# Supplementary material for: Sustainable Myrcene-Based Elastomers via a Convenient Anionic Polymerization
Source: PubMed Central journal article supplement (PMC7967150; doi:10.3390/polym13050838), 2021-03-09
Supplement: polymers-13-00838-s001.pdf [file polymers-13-00838-s001.pdf]

David Hermann Lamparelli,  
Magdalena Maria Kleybolte, Malte  
Winnacker and Carmine Capacchione

Sustainable myrcene-based  
elastomers via a convenient  
anionic polymerization

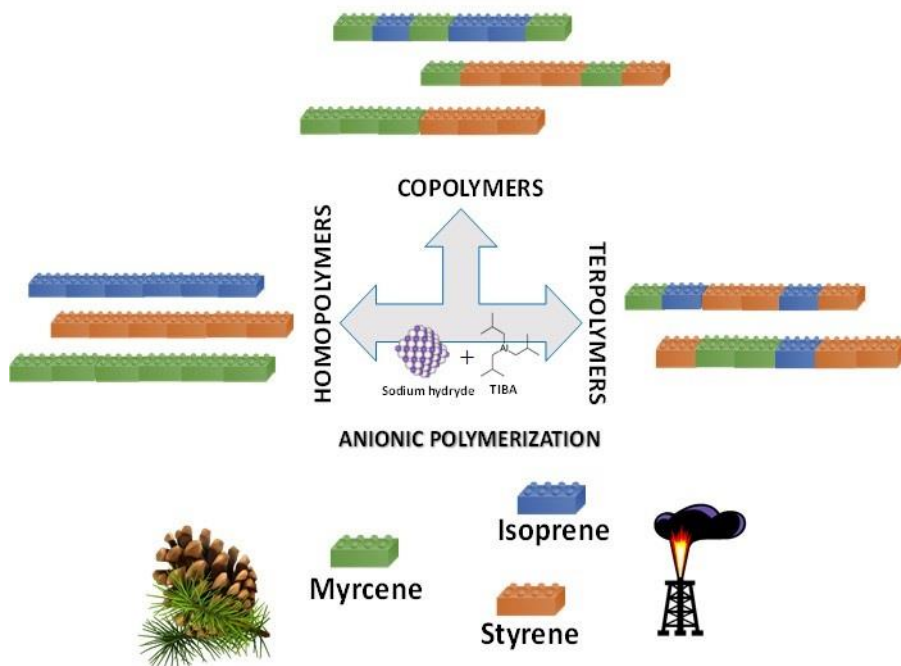

# Sustainable myrcene-based elastomers via a convenient anionic polymerization

David Hermann Lamparelli<sup>a</sup>, Magdalena Maria Kleybolte,<sup>b</sup> Malte Winnacker,<sup>\*b,c</sup> and Carmine Capacchione<sup>\*b</sup>

**Abstract:** Soluble heterocomplexes consisting of sodium hydride in combination with trialkylaluminum derivatives have been used as anionic initiating systems at 100 °C in toluene for convenient homo-, co- and ter-polymerization of myrcene with styrene and isoprene. In this way it has been possible to obtain elastomeric materials in a wide range of compositions with interesting thermal profiles and different polymeric architectures by simply modulating the alimentation feed and the [monomers]/[initiator systems] ratio. Especially, a complete study of the myrcene-styrene copolymers (PMS) was carried out, highlighting their tapered microstructures with high molecular weights (up to 159.8 KDa) and a single glass transition temperature. For PMS copolymer reactivity ratios,  $r_{myr} = 0.12 \pm 0.003$  and  $r_{sty} = 3.18 \pm 0.65$  and  $r_{myr} = 0.10 \pm 0.004$  and  $r_{sty} = 3.32 \pm 0.68$  were determined according to the Kelen-Tudos (KT) and extended Kelen-Tudos (exKT) methods, respectively. Finally, this study showed an economic and alternative approach for the production of various elastomers by anionic copolymerization of renewable terpenes, such as myrcene, with commodities.

---

<sup>a</sup> Department of Chemistry and Biology "Adolfo Zambelli", University of Salerno, Giovanni Paolo II Str., 84084 Fisciano, Italy.

E-mail: ccapacchione@unisa.it

<sup>b</sup> WACKER-Chair of Macromolecular Chemistry, Technische Universität München Lichtenbergstraße 4 Str., 85747 Garching bei München, Germany.

<sup>c</sup> Catalysis Research Center (CRC) Ernst-Otto-Fischer-Straße 1, Garching bei München 85748, Germany.

E-mail: malte.winnacker@tum.de

---

## Contents

|                                                                                                                                                  |    |
|--------------------------------------------------------------------------------------------------------------------------------------------------|----|
| <b>1. Analysis of polymer compositions</b> <sup>1-6</sup> .....                                                                                  | 6  |
| <b>2 Determination of Reactivity Ratios</b> .....                                                                                                | 8  |
| <b>2.1 Fineman-Ross method</b> .....                                                                                                             | 8  |
| <b>2.2 Kelen-Tudos method</b> .....                                                                                                              | 8  |
| <b>2.3 Extended Kelen-Tudos method</b> .....                                                                                                     | 9  |
| <b>3. NMR Characterizations</b> .....                                                                                                            | 11 |
| Figure S1. <sup>1</sup> H NMR spectrum (CDCl <sub>3</sub> , 25 °C, 400 MHz) of PM from run 1 of Table 1 .....                                    | 11 |
| Figure S2. <sup>13</sup> C NMR spectrum (CDCl <sub>3</sub> , 25 °C, 400 MHz) of PM from run 1 of Table 1 .....                                   | 11 |
| Figure S3. Enlargement of aliphatic region of <sup>13</sup> C NMR spectrum (CDCl <sub>3</sub> , 25 °C, 400 MHz) of PM from run 1 of Table 1..... | 12 |
| Figure S4. <sup>1</sup> H NMR spectrum (TCDE, 25 °C, 400 MHz) of PM from run 4 of Table 1 .....                                                  | 12 |
| Figure S5. <sup>13</sup> C NMR spectrum (TCDE, 25 °C, 400 MHz) of PM from run 4 of Table 1 .....                                                 | 13 |
| Figure S6. <sup>1</sup> H NMR spectrum (TCDE, 25 °C, 400 MHz) of PS from run 5 of Table 1.....                                                   | 13 |
| Figure S7. <sup>13</sup> C NMR spectrum (TCDE, 25 °C, 400 MHz) of PS from run 5 of Table 1.....                                                  | 14 |
| Figure S8. <sup>1</sup> H NMR spectrum (TCDE, 25 °C, 400 MHz) of PI from run 7 of Table 1 .....                                                  | 14 |
| Figure S9. <sup>13</sup> C NMR spectrum (TCDE, 25 °C, 400 MHz) of PI from run 7 of Table 1 .....                                                 | 15 |
| Figure S10. <sup>1</sup> H NMR spectrum (TCDE, 25 °C, 400 MHz) of PMS from run 12 of Table 2.....                                                | 15 |
| Figure S11. <sup>13</sup> C NMR spectrum (TCDE, 25 °C, 400 MHz) of PMS from run 12 of Table 2.....                                               | 16 |
| Figure S12. <sup>1</sup> H NMR spectrum (TCDE, 25 °C, 400 MHz) of PMS from run 13 of Table 2.....                                                | 16 |
| Figure S13. <sup>1</sup> H NMR spectrum (TCDE, 25 °C, 400 MHz) of PMS from run 14 of Table 2.....                                                | 17 |
| Figure S14. <sup>13</sup> C NMR spectra (TCDE, 25 °C, 400 MHz) of PMS copolymer from run 13 (a) and PMS diblock from run 21 (b) of Table 2 ..... | 18 |
| Figure S15. <sup>1</sup> H NMR spectra (TCDE, 25 °C, 400 MHz) of PM (run 3), PI (run 7) and PMI (run 16) from Table 2 .....                      | 19 |
| Figure S16. <sup>1</sup> H NMR spectrum (TCDE, 25 °C, 400 MHz) of PMI from run 16 of Table 2.....                                                | 19 |
| Figure S17. <sup>13</sup> C NMR spectrum (TCDE, 25 °C, 400 MHz) of PMI from run 16 of Table 2 .....                                              | 20 |
| Figure S18. <sup>13</sup> C NMR spectrum (TCDE, 25 °C, 400 MHz) of PMI from run 17 of Table 2 .....                                              | 20 |
| Figure S19. <sup>13</sup> C NMR spectrum (TCDE, 25 °C, 400 MHz) of PMI from run 18 of Table 2 .....                                              | 21 |
| Figure S20. <sup>1</sup> H NMR spectrum (TCDE, 25 °C, 400 MHz) of PMSI from run 18 of Table 2 .....                                              | 21 |
| Figure S21. <sup>13</sup> C NMR spectrum (TCDE, 25 °C, 400 MHz) of PMSI from run 18 of Table 2 .....                                             | 22 |
| Figure S22. <sup>13</sup> C NMR spectrum (CDCl <sub>3</sub> , 25 °C, 400 MHz) of PMSI from run 19 of Table 2 .....                               | 23 |
| Figure S23. <sup>13</sup> C NMR spectrum (TCDE, 25 °C, 400 MHz) of PMSI from run 20 of Table 2 .....                                             | 23 |
| Figure S24. DOSY NMR spectrum (CDCl <sub>3</sub> , 25 °C, 600 MHz) of PMS copolymers from run 13 of Table 2.....                                 | 24 |
| Figure S25. DOSY NMR spectrum (CDCl <sub>3</sub> , 25 °C, 600 MHz) of PMS diblock copolymers from run of 21 Table 2 .....                        | 25 |
| <b>4. DSC Thermal Analysis</b> .....                                                                                                             | 26 |
| Figure S26. DSC thermogram of PM from run 1 of Table 1. ....                                                                                     | 26 |
| Figure S27. DSC thermogram of PM from run 4 of Table 1. ....                                                                                     | 26 |

## SUPPORTING INFORMATION

|                                                                        |    |
|------------------------------------------------------------------------|----|
| Figure S28. DSC thermogram of PS from run 5 of Table 1.....            | 27 |
| Figure S29. DSC thermogram of PI from run 8 of Table 1. ....           | 27 |
| Figure S30. DSC thermogram of PI from run 9 of Table 1. ....           | 28 |
| Figure S31. DSC thermogram of PMS from run 10 of Table 2.....          | 28 |
| Figure S32. DSC thermogram of PMS from run 12 of Table 2.....          | 29 |
| Figure S33. DSC thermogram of PMS from run 14 of Table 2.....          | 29 |
| Figure S34. DSC thermogram of PMI from run 16 of Table 2.....          | 30 |
| Figure S35. DSC thermogram of PMSI from run 18 of Table 2. ....        | 30 |
| Figure S36. DSC thermogram of PMSI from run 20 of Table 2. ....        | 31 |
| Figure S37. DSC thermogram of diblock PMS from run 21 of Table 2. .... | 31 |
| <b>5. TGA Analysis</b> .....                                           | 32 |
| Figure S38. TGA thermogram of PM from run 1 of Table 1.....            | 32 |
| Figure S39. TGA thermogram of PS from run 5 of Table 1. ....           | 32 |
| Figure S40. TGA thermogram of PI from run 8 of Table 1.....            | 33 |
| Figure S41. TGA thermogram of PMS from run 12 of Table 2. ....         | 33 |
| Figure S42. TGA thermogram of PMS from run 14 of Table 2. ....         | 34 |
| Figure S43. TGA thermogram of PMI from run 15 of Table 2.....          | 34 |
| Figure S44. TGA thermogram of PMI from run 16 of Table 2.....          | 35 |
| Figure S45. TGA thermogram of PMI from run 17 of Table 2.....          | 35 |
| Figure S46. TGA thermogram of PMSI from run 20 of Table 2.....         | 36 |
| Figure S47. TGA thermogram of diblock PMS from run 21 of Table 2.....  | 36 |
| <b>6. GPC Analysis</b> .....                                           | 37 |
| Figure S48. GPC curve of PM from run 1 of Table 1.....                 | 37 |
| Figure S49. GPC curve of PM from run 2 of Table 1.....                 | 37 |
| Figure S50. GPC curve of PM from run 3 of Table 1.....                 | 38 |
| Figure S51. GPC curve of PM from run 4 of Table 1.....                 | 38 |
| Figure S52. GPC curve of PS from run 5 of Table 1. ....                | 39 |
| Figure S53. GPC curve of PI from run 8 of Table 1.....                 | 39 |
| Figure S54. GPC curve of PI from run 9 of Table 1.....                 | 40 |
| Figure S55. GPC curve of PMS from run 10 of Table 2.....               | 40 |
| Figure S56. GPC curve of PMS from run 12 of Table 2.....               | 41 |
| Figure S57. GPC curve of PMS from run 13 of Table 2.....               | 41 |
| Figure S58. GPC curve of PMI from run 16 of Table 2. ....              | 42 |
| Figure S59. GPC curve of PMI from run 17 of Table 2. ....              | 42 |
| Figure S60. GPC curve of PMSI from run 20 of Table 2. ....             | 43 |
| Figure S61. GPC curve of diblock PMS from run 21 of Table 2.....       | 43 |
| <b>7. CAM Analysis</b> .....                                           | 44 |
| <b>8. SEM Analysis</b> .....                                           | 46 |

## SUPPORTING INFORMATION

---

|                                                                                                                                                                        |    |
|------------------------------------------------------------------------------------------------------------------------------------------------------------------------|----|
| <b>9. Kinetic studies</b> .....                                                                                                                                        | 47 |
| <b>Figure S61. Conversion vs. time plot for isoprene polymerization (on left); plots of <math>M_w</math> (and <math>\bar{D}</math>) vs conversion (on right)</b> ..... | 47 |
| <b>Figure S62. Conversion vs. time plot for myrcene polymerization (on left); plots of <math>M_w</math> (and <math>\bar{D}</math>) vs conversion (on right)</b> .....  | 47 |
| <b>10. References</b> .....                                                                                                                                            | 47 |
| <b>11. Author Contributions</b> .....                                                                                                                                  | 47 |

## SUPPORTING INFORMATION

### 1. Analysis of polymer compositions <sup>1-6</sup>

#### 1.1 Determination of M<sup>3,4</sup> and M<sup>1,4</sup> contents in PM and PMS copolymers by <sup>1</sup>H NMR (TCE-*d*<sub>2</sub>, 25 °C)

$$\bullet \quad M^{3,4}(\text{mol}\%) = \frac{A_B}{A_A + \frac{A_B}{2} + A_C} \cdot 100 \quad \text{Equation E1}$$

Where:  $A_A$  is the area of the signals  $M^{1,4}_3$ ,  $M^{1,4}_7$ ,  $M^{1,2}_7$  and  $M^{3,4}_7$  ( $\delta = 5.12$  ppm);  $A_B$  is the area of the signal  $M^{3,4}_1$  ( $\delta = 4.77$  ppm);  $A_C$  is the area of the signal  $M^{1,2}_3$  ( $\delta = 5.63$  ppm);

$$\bullet \quad M^{1,4}(\text{mol}\%) = \frac{A_A - (\frac{A_B}{2} + A_C)}{A_A + \frac{A_B}{2} + A_C} \cdot 100 \quad \text{Equations E2}$$

$$\bullet \quad M^{1,2}(\text{mol}\%) = 100 - (M^{3,4}(\text{mol}\%) + M^{1,4}(\text{mol}\%))$$

#### 1.2 Determination of M and S contents in PSM copolymers by <sup>1</sup>H NMR (TCE-*d*<sub>2</sub>, 25 °C)

$$\bullet \quad M(\text{mol}\%) = \frac{\frac{1}{2}(A_A + \frac{A_B}{2})}{\frac{1}{2}(A_A + \frac{A_B}{2}) + \frac{A_C}{5}} \cdot 100 \quad \text{Equation E3}$$

Where:  $A_A$  is the area of the signals  $M^{1,4}_3$ ,  $M^{1,4}_7$  and  $M^{3,4}_7$  ( $\delta = 5.12$  ppm);  $A_B$  is the area of the signal  $M^{3,4}_1$  ( $\delta = 4.77$  ppm);  $A_C$  is the area of the signals  $S_4$ ,  $S_5$  and  $S_6$  ( $\delta = 6.45-7.45$  ppm)

$$\bullet \quad S(\text{mol}\%) = 100 - M(\text{mol}\%) \quad \text{Equation E4}$$

#### 1.3 Determination of I<sup>3,4</sup>, I<sup>1,4</sup> and I<sup>1,2</sup> contents in PI by <sup>1</sup>H NMR (CDCl<sub>3</sub> or TCE-*d*<sub>2</sub>, 25 °C)

$$\bullet \quad I^{3,4}(\text{mol}\%) = \frac{\frac{B_A}{2}}{\frac{B_A}{2} + (B_B - 2B_C) + B_C} \cdot 100 \quad \text{Equation E5}$$

Where:  $B_A$  is the area of the signals  $I^{3,4}_1$  ( $\delta = 4.60-4.80$  ppm);  $B_B$  is the area of the signal  $I^{1,2}_4$  and  $I^{1,4(\text{cis+trans})}_3$  ( $\delta = 4.80-5.40$  ppm) and  $B_C$  is the area of the signal  $I^{1,2}_3$  ( $\delta = 5.75-5.90$  ppm)

$$\bullet \quad I^{1,4}(\text{mol}\%) = \frac{(B_B - 2B_C)}{\frac{B_A}{2} + (B_B - 2B_C) + B_C} \cdot 100 \quad \text{Equation E6}$$

$$\bullet \quad I^{1,2}(\text{mol}\%) = 100 - I^{3,4}(\text{mol}\%) - I^{1,4}(\text{mol}\%) \quad \text{Equation E7}$$

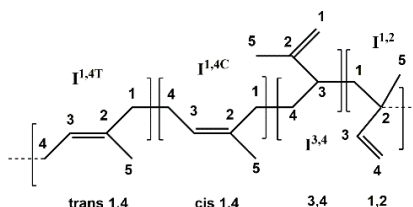

#### 1.4 Determination of I<sup>1,4 cis</sup> and I<sup>1,4 trans</sup> contents in PI by <sup>13</sup>C NMR (CDCl<sub>3</sub>, 25 °C)

$$\bullet \quad I^{1,4 \text{ cis}}(\text{mol}\%) = \frac{C_A}{C_A + C_B} \cdot 100 \quad \text{Equation E8}$$

## SUPPORTING INFORMATION

Where:  $C_A$  is the area of the signal  $I^{1,4 \text{ cis}}_5$  ( $\delta=23.5$  ppm);  $C_B$  is the area of the signal  $I^{1,4 \text{ TRANS}}_5$  ( $\delta=16.3$  ppm)

$$\bullet \quad I^{1,4 \text{ trans}}(\text{mol}\%) = 100 - I^{1,4 \text{ cis}}(\text{mol}\%) \quad \text{Equation E9}$$

### 1.5 Determination of M and I contents in PMI copolymers by $^{13}\text{C}$ NMR ( $\text{CDCl}_3$ , 25 °C)

$$\bullet \quad M(\text{mol}\%) = \frac{C_A}{C_A+C_B+C_C} \cdot 100 \quad \text{Equation E10}$$

where:  $C_A$  is the sum of the areas related to the signals  $M^{1,4 \text{ (cis+trans)}}_2$  ( $\delta=139.3$  ppm) and  $M^{3,4}_2$  ( $\delta=151.6$  ppm);  $C_B$  is the area of the signals  $I^{3,4}_1$  and  $I^{1,2}_4$  ( $\delta=111.4$  ppm);  $C_C$  is the area of the signals  $I^{1,4}_2$  ( $\delta=135.6$  ppm)

$$\bullet \quad I(\text{mol}\%) = 100 - M(\text{mol}\%) \quad \text{Equation E11}$$

### 1.6 Determination of $M^{3,4}$ and $M^{1,4}$ contents in PMI copolymers by $^{13}\text{C}$ NMR ( $\text{CDCl}_3$ , 25 °C)

$$\bullet \quad M^{3,4}(\text{mol}\%) = \frac{C_D}{C_A} \cdot 100 \quad \text{Equation E12}$$

where:  $C_A$  is the sum of the areas related to the signals  $M^{1,4 \text{ (cis+trans)}}_2$  ( $\delta=139.3$  ppm) and  $M^{3,4}_2$  ( $\delta=151.6$  ppm);  $C_D$  is the area of the signals  $M^{3,4}_2$  ( $\delta=151.6$  ppm)

$$\bullet \quad M^{1,4}(\text{mol}\%) = 100 - M^{3,4}(\text{mol}\%) \quad \text{Equation S13}$$

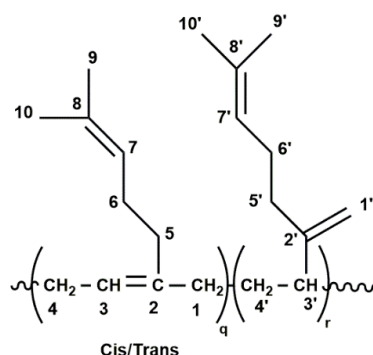

### 1.5 Determination of M and I contents in PMI copolymers by $^{13}\text{C}$ NMR ( $\text{TCE-d}_2$ , 25 °C)

$$\bullet \quad M(\text{mol}\%) = \frac{C_A}{C_A+C_B+C_C+C_E} \cdot 100 \quad \text{Equation E14}$$

where:  $C_A$  is the sum of the areas related to the signals  $M^{1,4 \text{ (cis+trans)}}_2$  ( $\delta=139.3$  ppm) and  $M^{3,4}_2$  ( $\delta=151.6$  ppm);  $C_B$  is the area of the signals  $I^{3,4}_1$  and  $I^{1,2}_4$  ( $\delta=111.4$  ppm);  $C_C$  is the area of the signals  $I^{1,4}_2$  ( $\delta=135.6$  ppm);  $C_E$  is the area of the signals  $S_{3''}$  ( $\delta=145.5$  ppm) (see Fig. S6)

$$\bullet \quad I(\text{mol}\%) = \frac{C_B+C_C}{C_A+C_B+C_C+C_E} \cdot 100 \quad \text{Equation E15}$$

$$\bullet \quad S(\text{mol}\%) = \frac{C_E}{C_A+C_B+C_C+C_E} \cdot 100 \quad \text{Equation E16}$$

## 2 Determination of Reactivity Ratios

### 2.1 Fineman-Ross method

Fineman-Ross equation:  $[(f-1)/f]F = r_1 - r_2 F^2/f$

where:  $f$  = myrcene/styrene molar ratios in the polymer (by  $^1\text{H}$  NMR analysis)

$F$  = myrcene/styrene molar ratios in the feed

$r_1, r_2$  = reactivity ratios

**Table T1.** Copolymerization of M and S with  $i\text{-Bu}_3\text{Al}/\text{NaH}$ .

| Run <sup>a</sup> | Feed composition |       | Yield<br>% | Copolymer composition |        | M/S (molar ratio) |                  | $F^2/f$ | $(f-1/f)F$ |
|------------------|------------------|-------|------------|-----------------------|--------|-------------------|------------------|---------|------------|
|                  | M                | S     |            | M                     | S      | in feed (F)       | in copolymer (f) |         |            |
|                  | (mol)            | (mol) |            | (mol%)                | (mol%) |                   |                  |         |            |
| 1                | 0.42             | 0.42  | 9.1        | 21                    | 79     | 1,00              | 0,26             | 3,76    | -2,76      |
| 2                | 0.42             | 0,13  | 8,4        | 42                    | 58     | 3,24              | 0,72             | 14,47   | -1,23      |
| 3                | 0.42             | 0,11  | 9,5        | 45                    | 55     | 3,81              | 0,82             | 17,72   | -0,85      |
| 4                | 0.42             | 0,07  | 6,8        | 49                    | 51     | 5,99              | 0,96             | 37,38   | 0,24       |
| 5                | 0.42             | 0,04  | 8,6        | 66                    | 34     | 10,5              | 1,94             | 56,73   | 5,09       |

<sup>a</sup> Reaction conditions: 88  $\mu\text{L}$ , toluene 0.5 mL, tetrahydrofuran 25  $\mu\text{L}$ , 100  $^\circ\text{C}$ , 30 min.

**Table T2.** Reactivity ratio for copolymerization of M and S.

| Initiator                           | $r_1$            | $r_2$           | $r_1 \cdot r_2$ |
|-------------------------------------|------------------|-----------------|-----------------|
| $i\text{-Bu}_3\text{Al}/\text{NaH}$ | $0.13 \pm 0.002$ | $3.47 \pm 0.91$ | 0.45            |

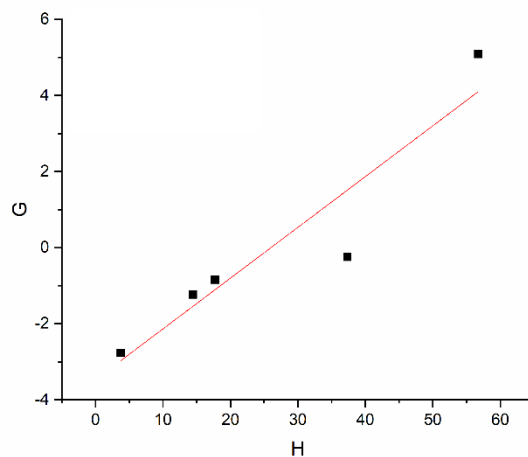

**Figure A1.** Fineman-Ross plot for copolymerization of myrcene and styrene with  $i\text{-Bu}_3\text{Al}/\text{NaH}$  as initiating system at 100  $^\circ\text{C}$  in toluene and in the presence of THF ( $F = [\text{Myr}]/[\text{Sty}]$  in feed,  $f = [\text{Myr}]/[\text{Sty}]$  in copolymers,  $r_{\text{Myr}} = 0.13 \pm 0.002$  and  $r_{\text{Sty}} = 3.47 \pm 0.91$ ).

### 2.2 Kelen-Tudos method

The reactivity ratio can also be estimated with Kelen-Tudos equation ( $\eta = (r_1 + r_2/\alpha)\xi - r_2/\alpha$ ) which variables are expressed as:

$$G = (f-1)/f$$

$$H = F^2/f$$

$$\eta = G/(\alpha + H)$$



## SUPPORTING INFORMATION

$$\xi = H/(\alpha+H)$$

Where  $\eta$  and  $\xi$  are the functions of the parameters G and H, and  $\alpha$  is a constant equal to  $(H_{\max} \times H_{\min})^{1/2}$ ,  $H_{\max}$  and  $H_{\min}$  being the lowest and highest H values, respectively.

The intercepts at  $\xi = 0$  and  $\xi = 1$  of the  $\eta$  versus  $\xi$  plot gives  $-r_1/\alpha$  and  $r_2$

**Table T3.** FR and KT parameters for PMS copolymers

| Sample | F = M <sub>1</sub> /M <sub>2</sub> | f = m <sub>1</sub> /m <sub>2</sub> | H    | G     | $\xi$ | $\eta$ |
|--------|------------------------------------|------------------------------------|------|-------|-------|--------|
| RR1    | 1,00                               | 0,26                               | 3,76 | -2,76 | 0,20  | -0,150 |
| RR2    | 3,24                               | 0,72                               | 14,4 | -1,23 | 0,50  | -0,042 |
| RR3    | 3,81                               | 0,82                               | 17,7 | -0,85 | 0,55  | -0,026 |
| RR4    | 5,99                               | 0,96                               | 37,4 | -0,24 | 0,72  | -0,004 |
| RR5    | 10,4                               | 1,94                               | 56,7 | 5,09  | 0,80  | 0,071  |

$$\alpha = (H_{\min} \times H_{\max})^{1/2} = 14,60.$$

**Table T4.** Reactivity ratio for copolymerization of M and S.

| Iniziator                | r <sub>1</sub> | r <sub>2</sub> | r <sub>1</sub> •r <sub>1</sub> |
|--------------------------|----------------|----------------|--------------------------------|
| i-Bu <sub>3</sub> Al/NaH | 0.12 ± 0.003   | 3.18 ± 0.65    | 0.38                           |

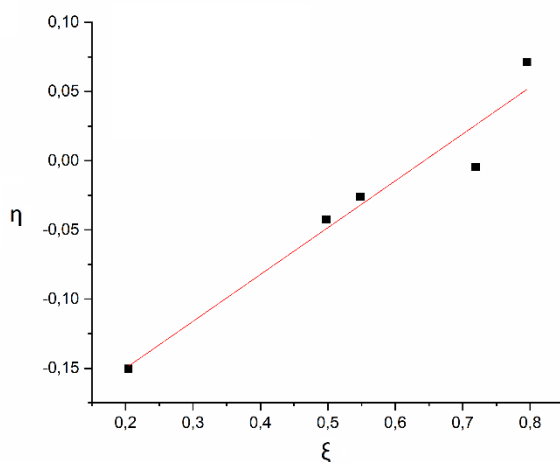

**Figure A2.** Determination of reactivity ratios using Kelen-Tudos method for PMS copolymers ( $r_{M_1} = 0.12 \pm 0.003$  and  $r_{S_1} = 3.18 \pm 0.65$ ).

### 2.3 Extended Kelen-Tudos method

$Z = \log(1 - S_1)/\log(1 - S_2)$  where  $S_1$  and  $S_2$  are the partial molar conversions:

$$S_2 = w(\mu + F)/(\mu + f) \times 100, w = \text{percentage of conversions}, \mu = M_{wt\ 2}/M_{wt\ 1}$$

$$S_1 = S_2f/F;$$

They derived an expression,  $H = F2/f$  and  $G = F(f - 1)/f$ . In this method also,  $r_2$  and  $r_1$  can be readily obtained either graphically or computation using the least square methods by plotting 1 versus 0. The 1 versus 0 plot gives a straight line between 0 and 1 provided the system can be adequately described by the conventional copolymerization composition equation.

**Table T5.** exKT parameters for PMS copolymers

| Sample | S <sub>1</sub> | S <sub>2</sub> | Z     | H    | G     | $\xi$ | $\eta$ |
|--------|----------------|----------------|-------|------|-------|-------|--------|
| RR1    | 0,041          | 0,155          | 0,249 | 4,26 | -2,93 | 0,186 | -0,129 |
| RR2    | 0,050          | 0,225          | 0,202 | 17,6 | -1,36 | 0,486 | -0,038 |
| RR3    | 0,059          | 0,274          | 0,189 | 22,8 | -0,95 | 0,550 | -0,023 |
| RR4    | 0,043          | 0,266          | 0,140 | 48,4 | -0,28 | 0,722 | -0,004 |
| RR5    | 0,066          | 0,358          | 0,154 | 81,2 | 6,09  | 0,814 | 0,061  |

$$\alpha = (H_{\min} \times H_{\max})^{1/2} = 18,60, \mu = 0,765.$$

## SUPPORTING INFORMATION

**Table T6.** Reactivity ratio for copolymerization of M and S.

| Iniator                  | $r_1$            | $r_2$           | $r_1 \bullet r_2$ |
|--------------------------|------------------|-----------------|-------------------|
| i-Bu <sub>3</sub> Al/NaH | $0.10 \pm 0.004$ | $3.32 \pm 0.68$ | 0.33              |

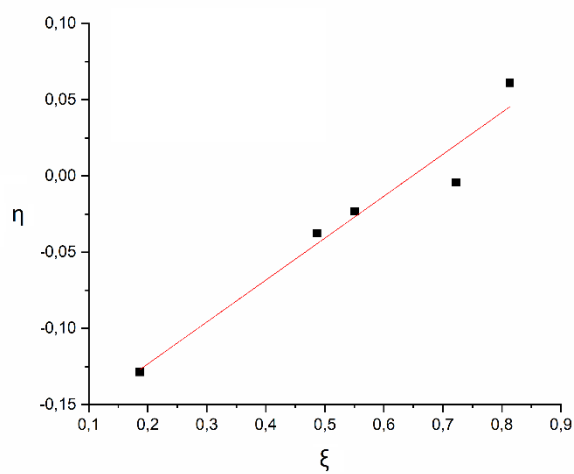

**Figure A3.** Determination of reactivity ratios using extended Kelen-Tudos method for PMS copolymers ( $r_{Myr} = 0.10 \pm 0.004$  and  $r_{Sty} = 3.32 \pm 0.68$ ).

## 3. NMR Characterizations

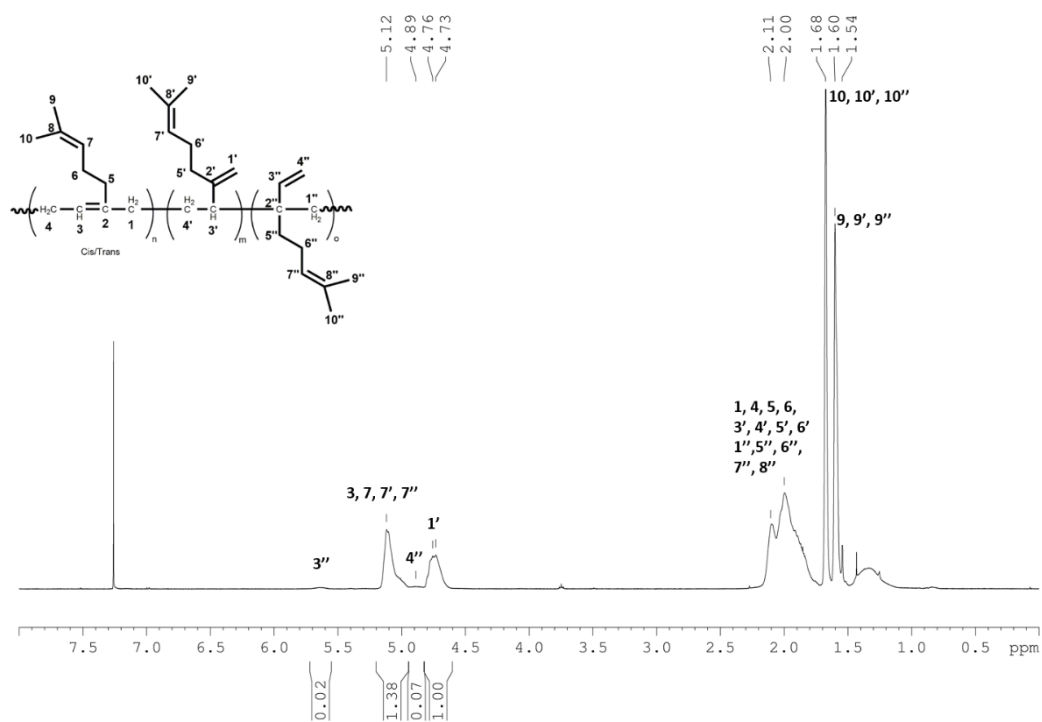Figure S1. <sup>1</sup>H NMR spectrum (CDCl<sub>3</sub>, 25 °C, 400 MHz) of PM from run 1 of Table 1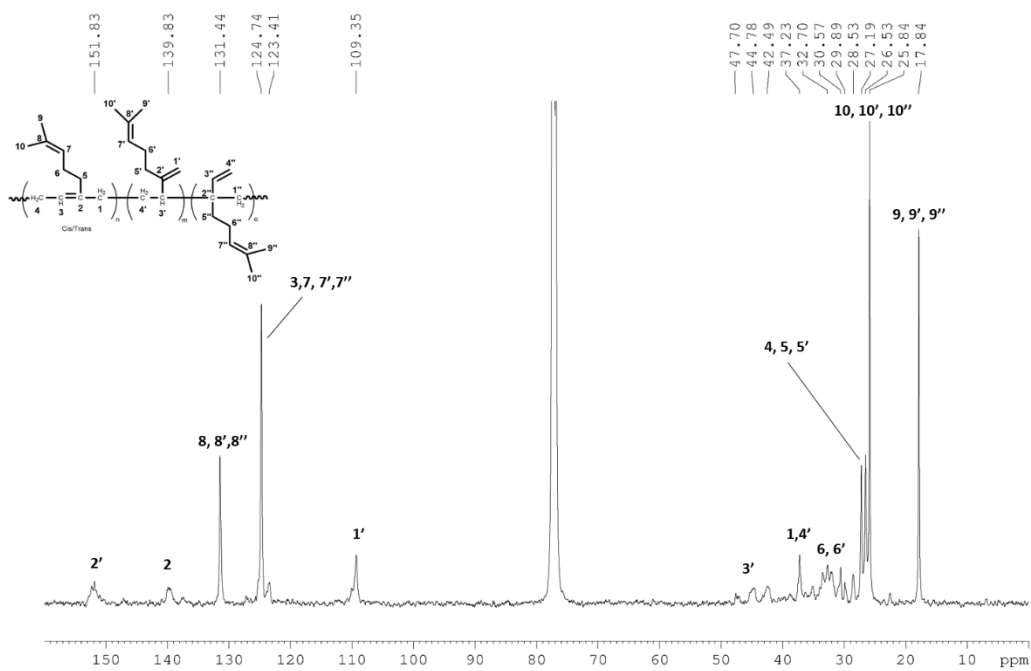Figure S2. <sup>13</sup>C NMR spectrum (CDCl<sub>3</sub>, 25 °C, 400 MHz) of PM from run 1 of Table 1

# SUPPORTING INFORMATION

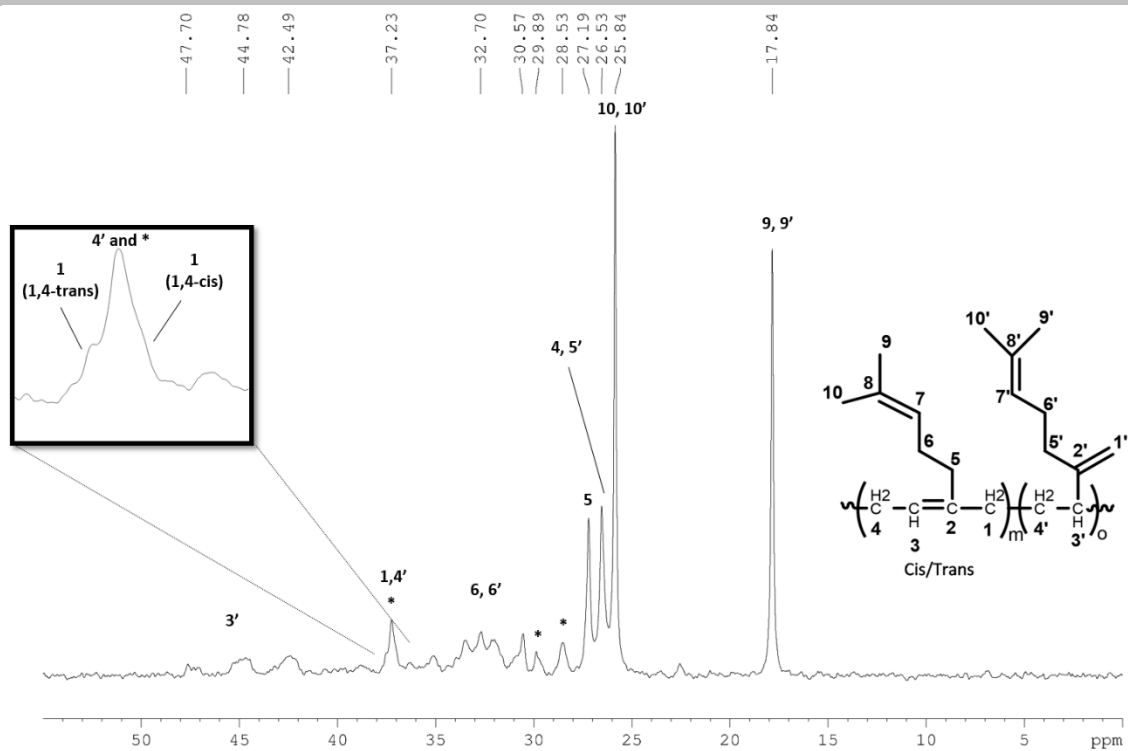

**Figure S3.** Enlargement of aliphatic region of  $^{13}\text{C}$  NMR spectrum ( $\text{CDCl}_3$ , 25 °C, 400 MHz) of PM from run 1 of **Table 1**

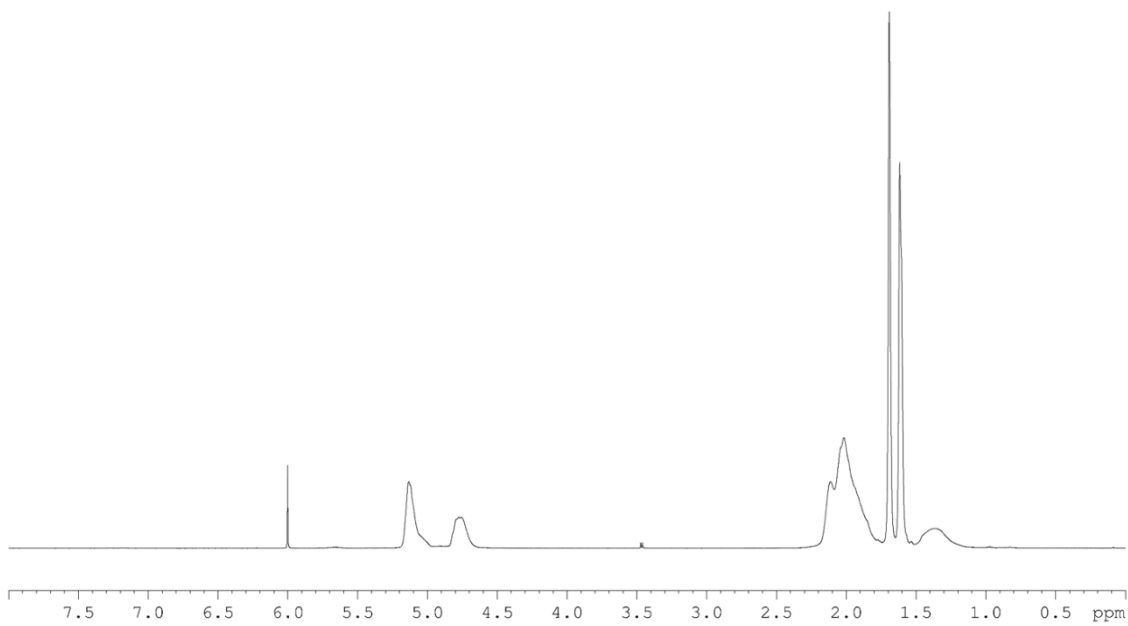

**Figure S4.**  $^1\text{H}$  NMR spectrum (TCDE, 25 °C, 400 MHz) of PM from run 4 of **Table 1**

# SUPPORTING INFORMATION

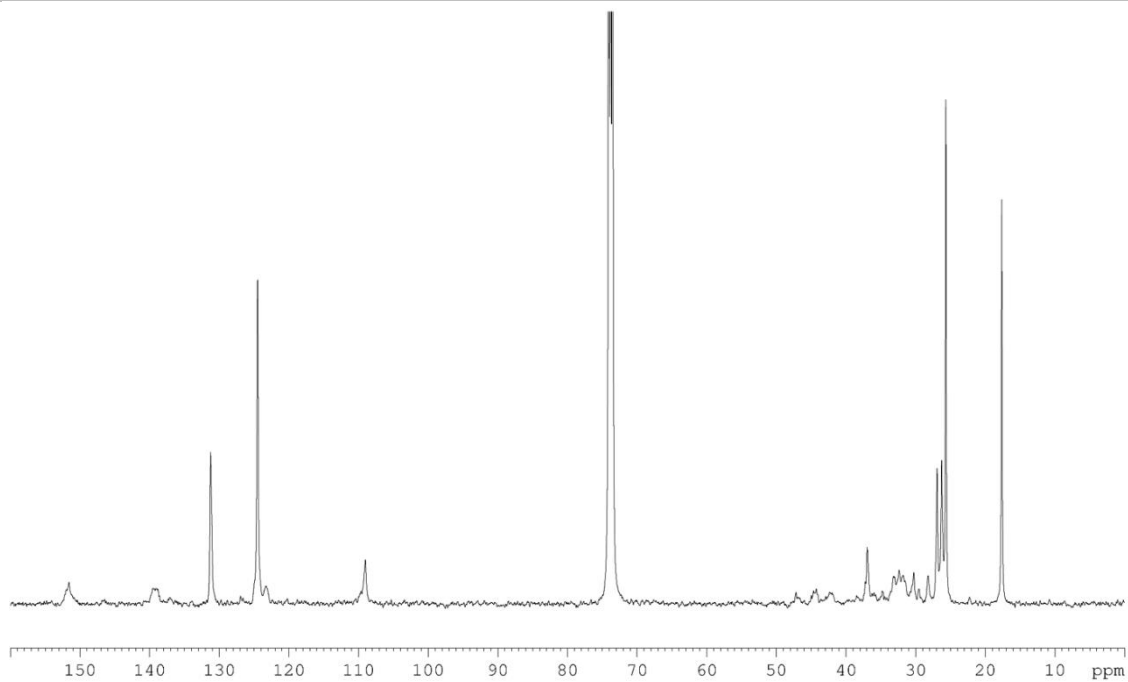

**Figure S5.**  $^{13}\text{C}$  NMR spectrum (TCDE, 25 °C, 400 MHz) of PM from run 4 of **Table 1**

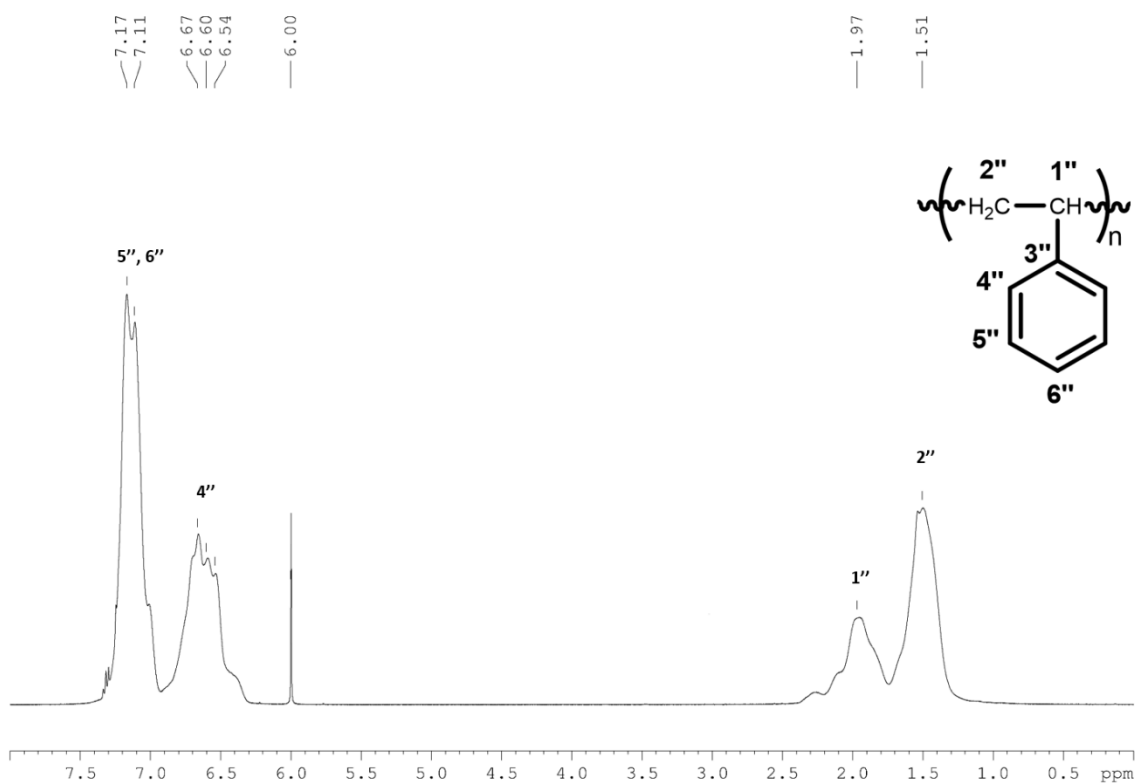

**Figure S6.**  $^1\text{H}$  NMR spectrum (TCDE, 25 °C, 400 MHz) of PS from run 5 of **Table 1**

# SUPPORTING INFORMATION

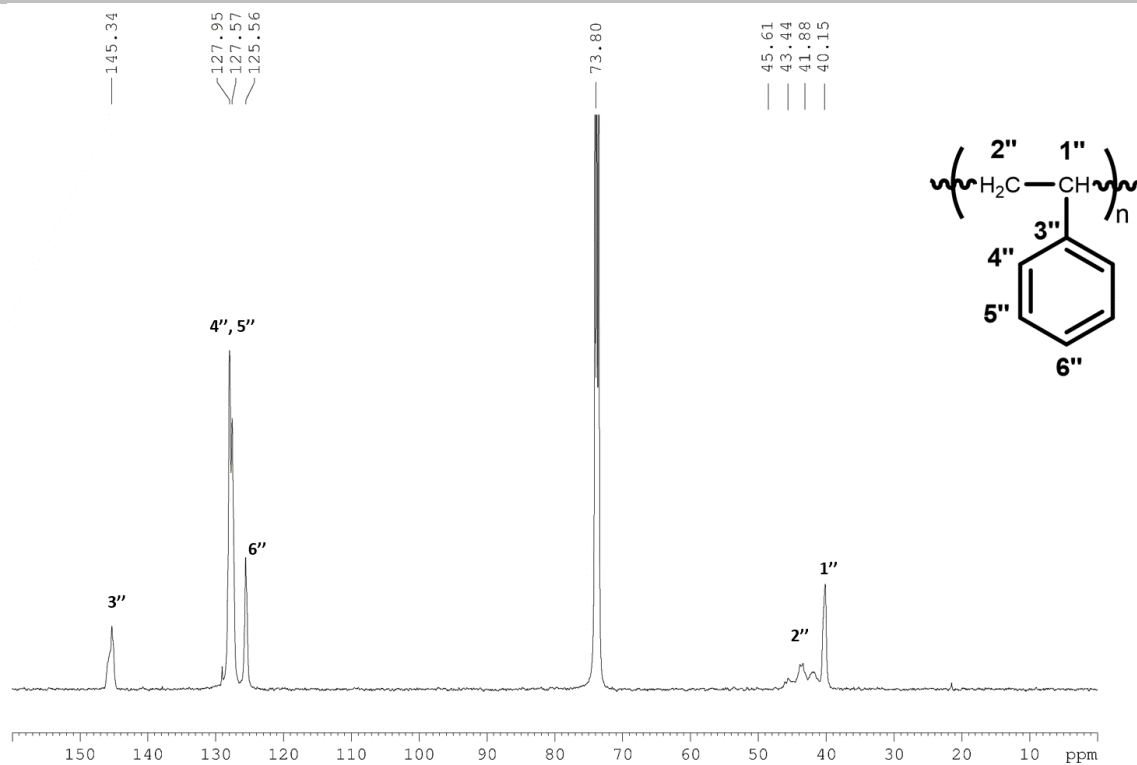

Figure S7.  $^{13}\text{C}$  NMR spectrum (TCDE, 25 °C, 400 MHz) of PS from run 5 of Table 1

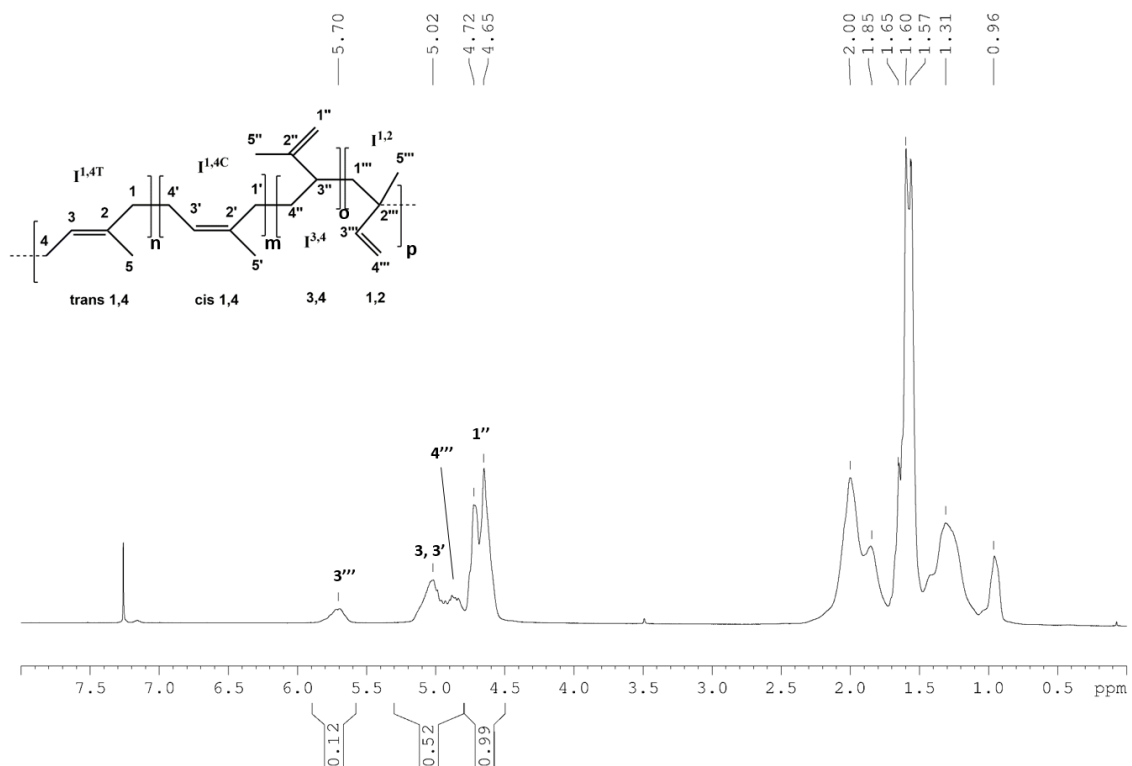

Figure S8.  $^1\text{H}$  NMR spectrum (TCDE, 25 °C, 400 MHz) of PI from run 7 of Table 1

# SUPPORTING INFORMATION

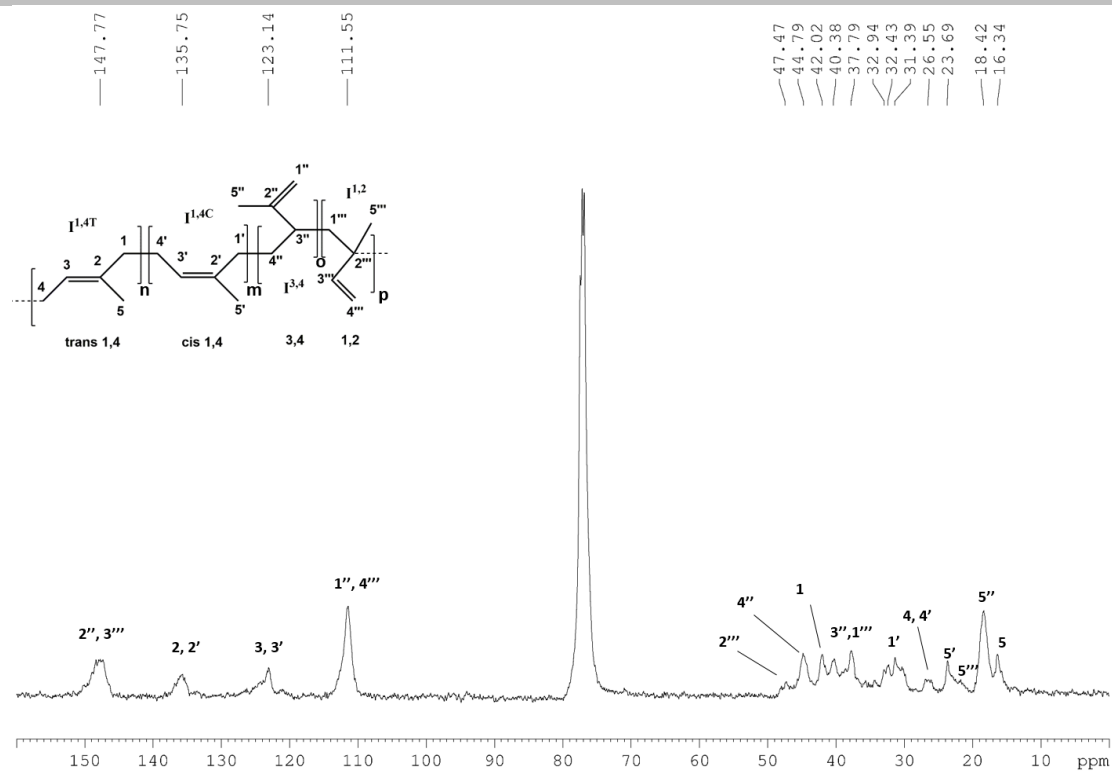

Figure S9.  $^{13}\text{C}$  NMR spectrum (TCDE, 25 °C, 400 MHz) of PI from run 7 of Table 1

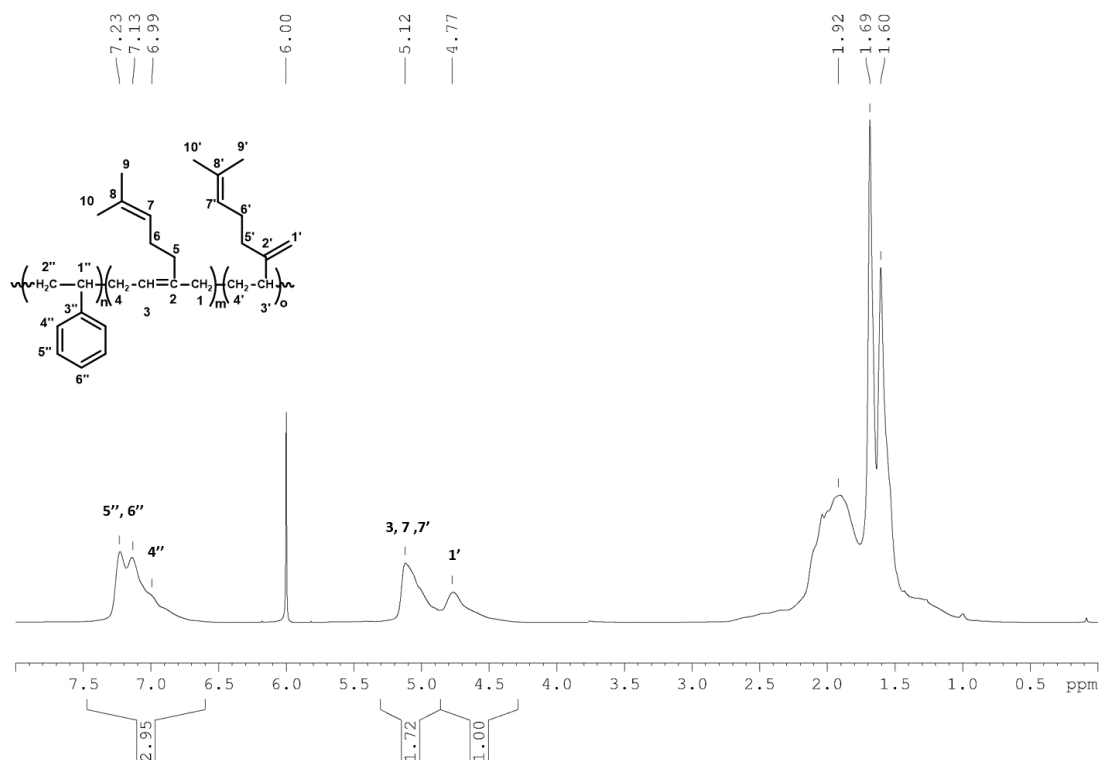

Figure S10.  $^1\text{H}$  NMR spectrum (TCDE, 25 °C, 400 MHz) of PMS from run 12 of Table 2

## SUPPORTING INFORMATION

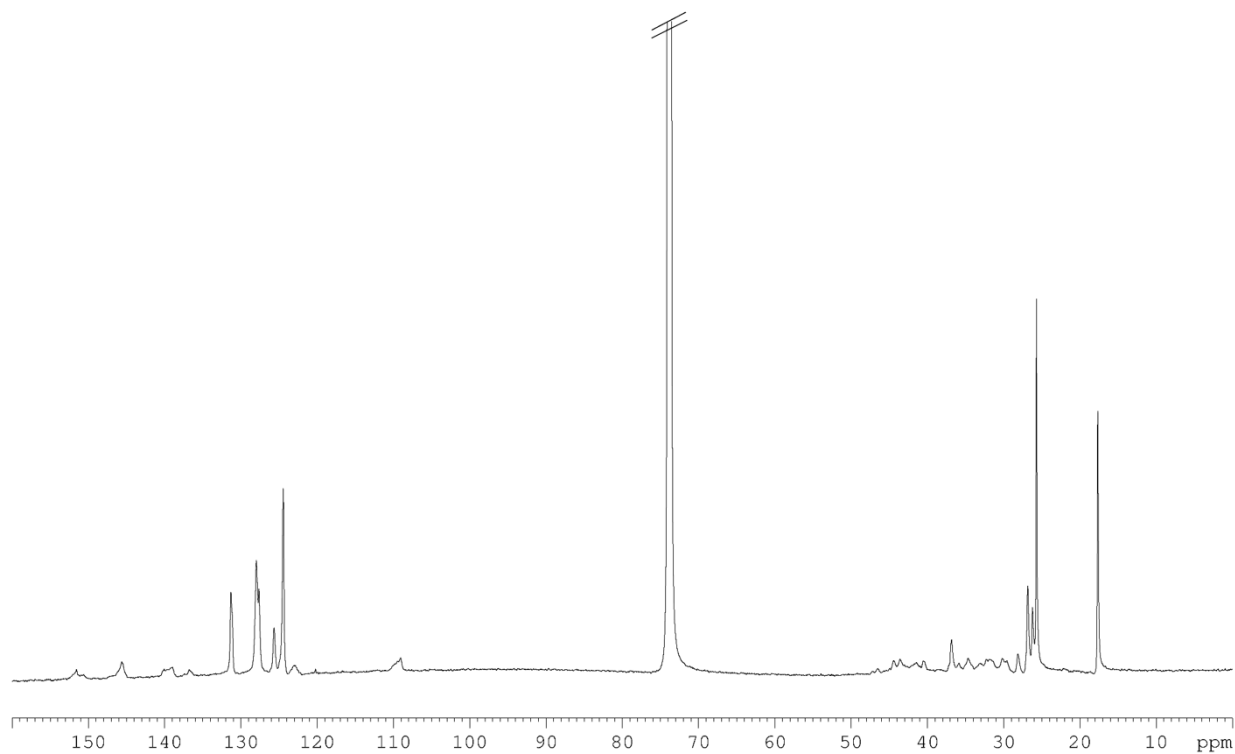

**Figure S11.**  $^{13}\text{C}$  NMR spectrum (TCDE, 25 °C, 400 MHz) of PMS from run 12 of **Table 2**

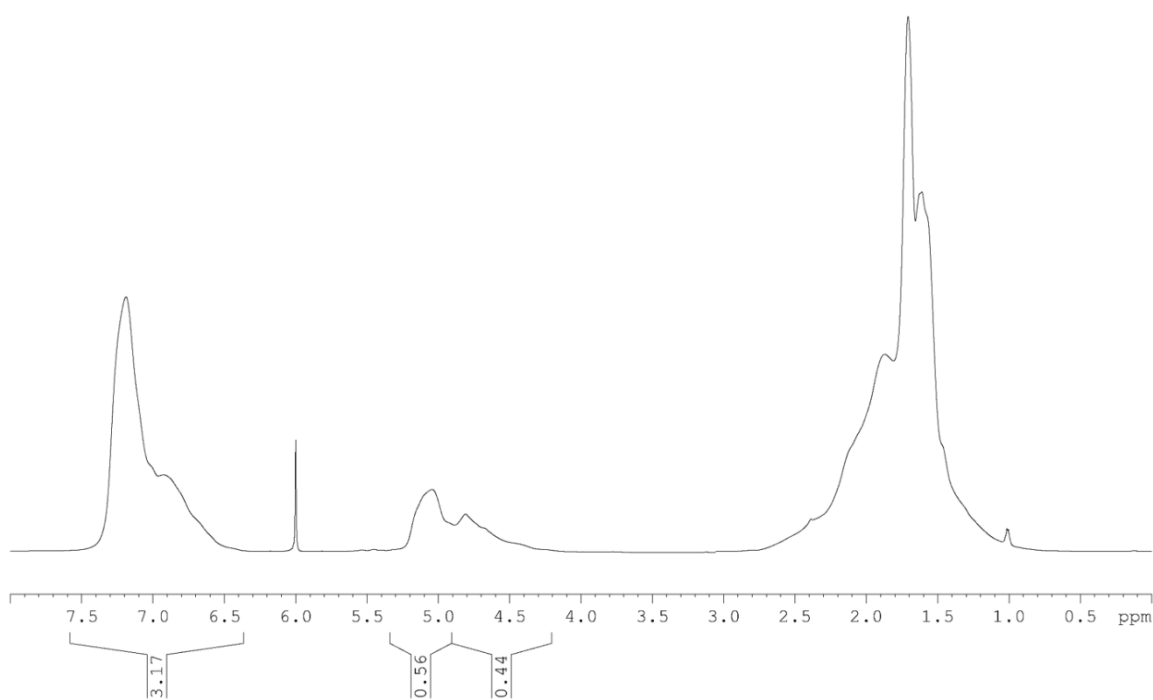

**Figure S12.**  $^1\text{H}$  NMR spectrum (TCDE, 25 °C, 400 MHz) of PMS from run 13 of **Table 2**



## SUPPORTING INFORMATION

---

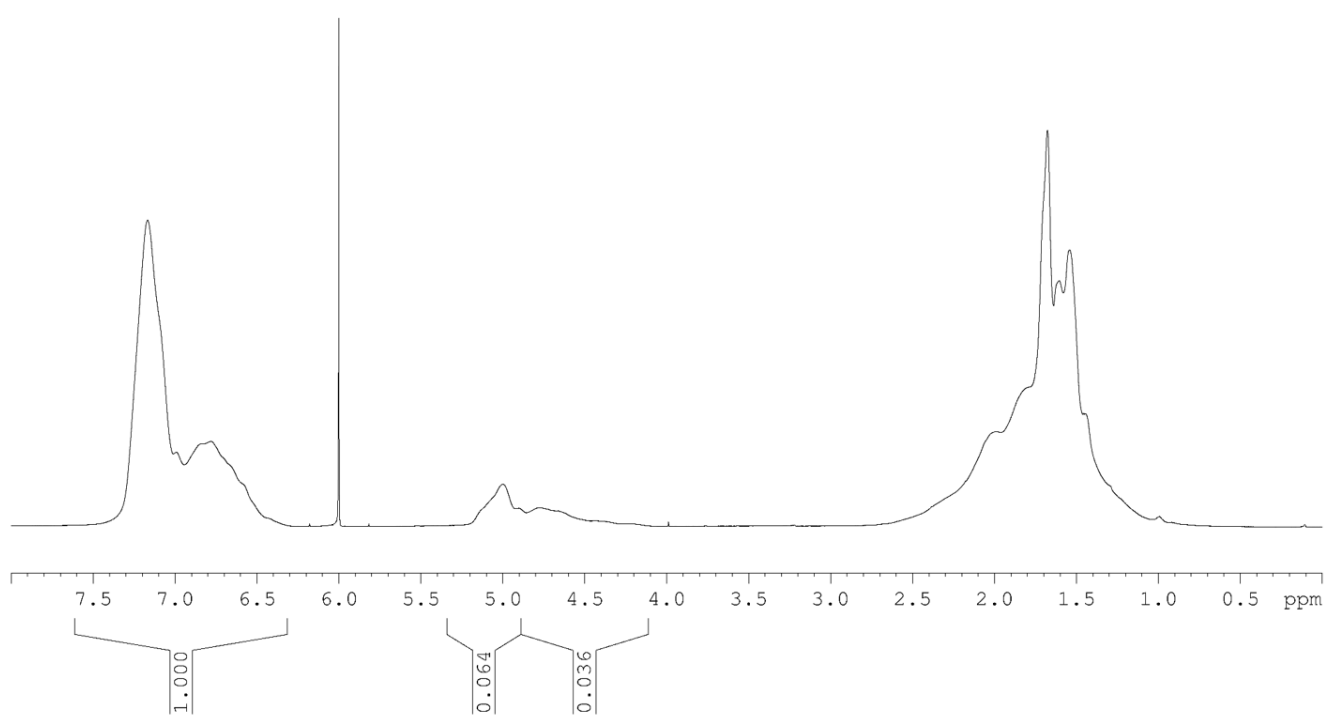

**Figure S13.**  $^1\text{H}$  NMR spectrum (TCDE, 25  $^\circ\text{C}$ , 400 MHz) of PMS from run 14 of **Table 2**

# SUPPORTING INFORMATION

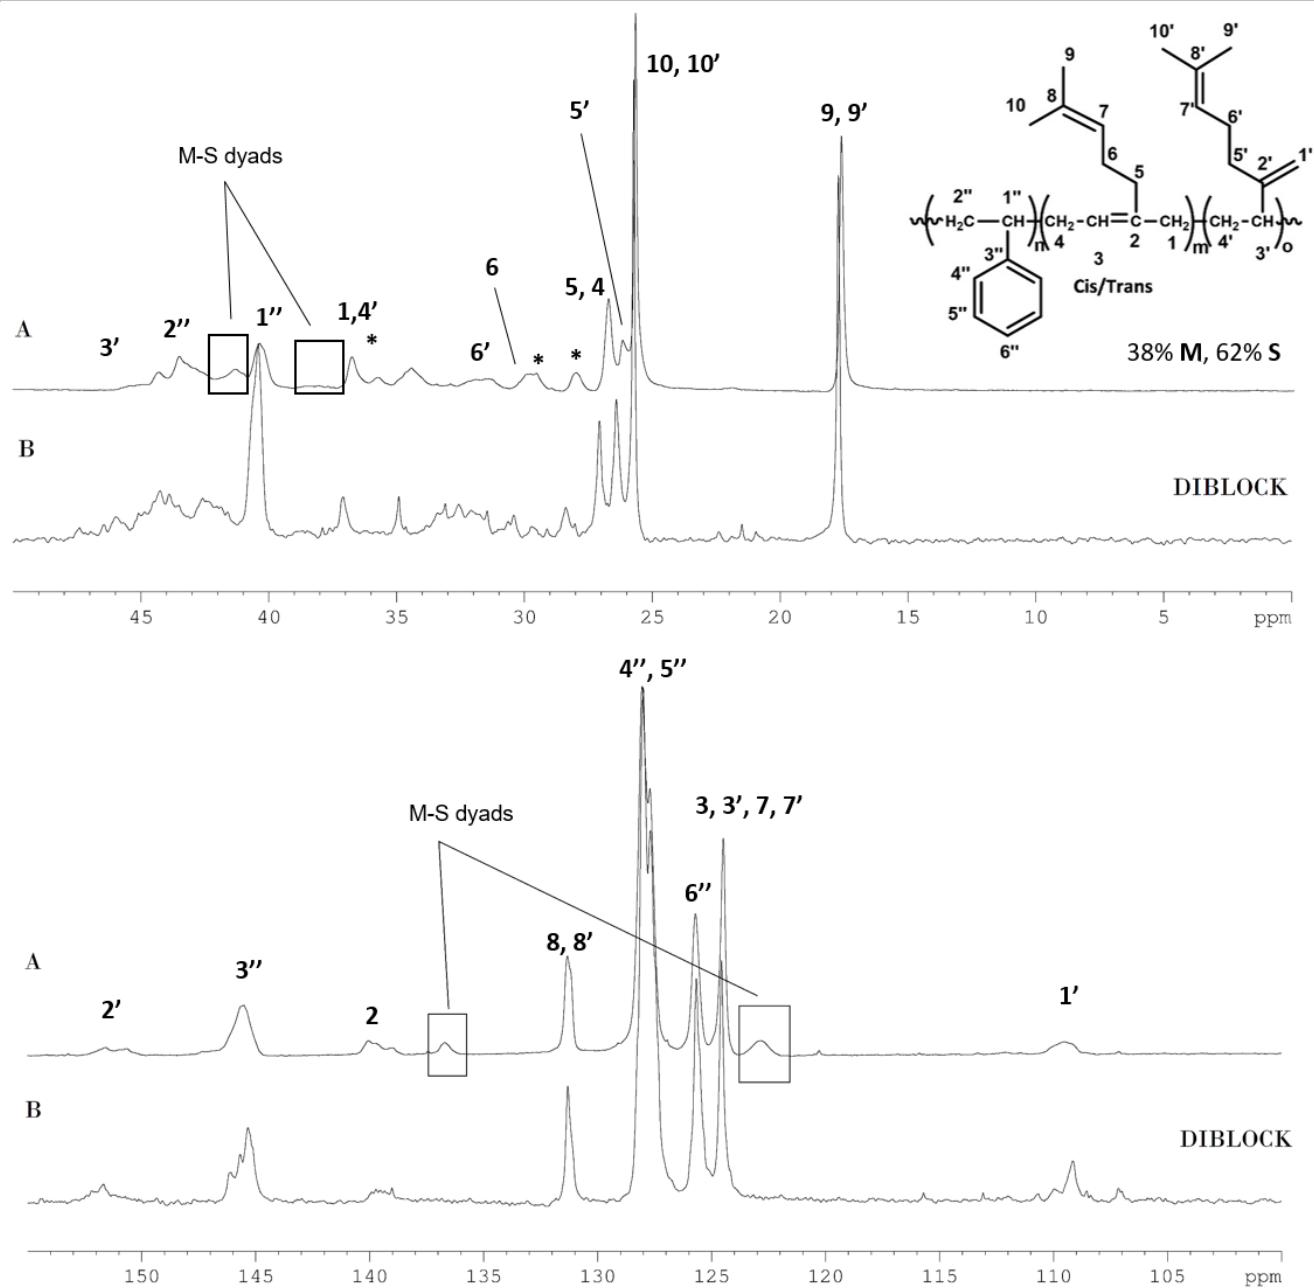

**Figure S14.**  $^{13}\text{C}$  NMR spectra (TCDE, 25 °C, 400 MHz) of PMS copolymer from run 13 (a) and PMS diblock from run 21 (b) of **Table 2**

## SUPPORTING INFORMATION

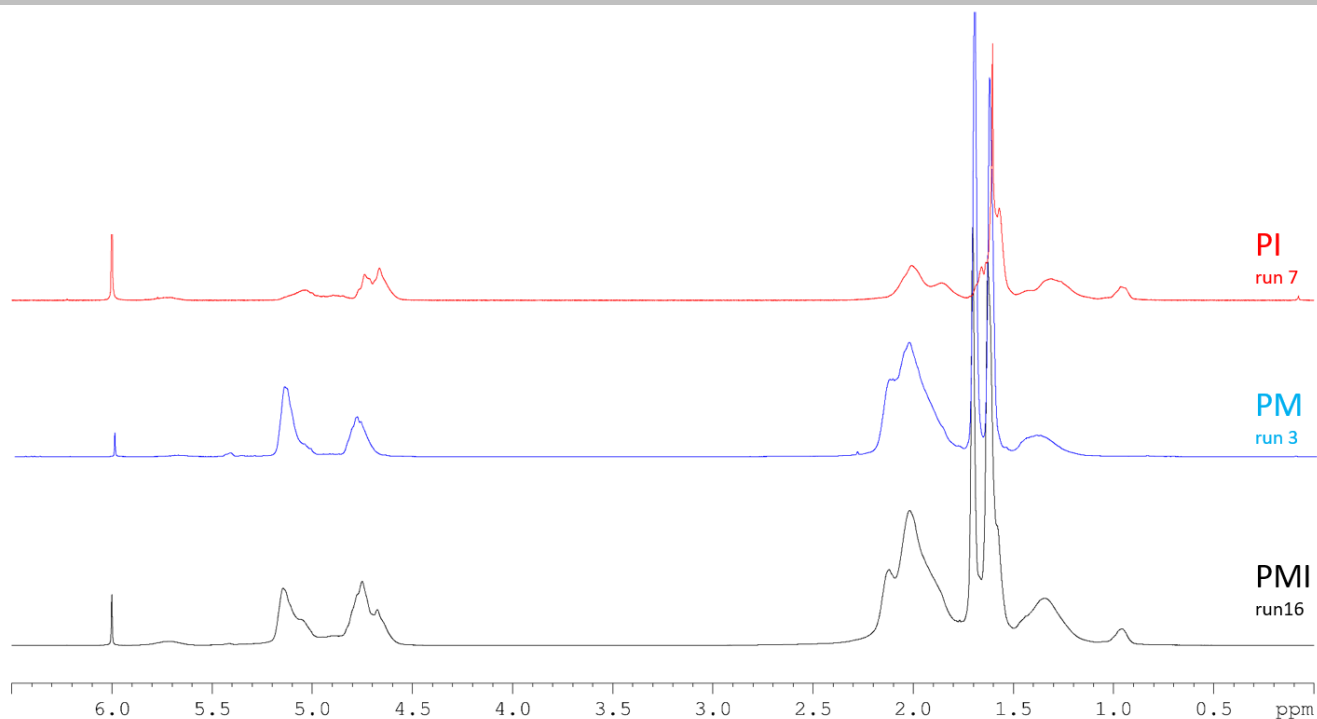

Figure S15. <sup>1</sup>H NMR spectra (TCDE, 25 °C, 400 MHz) of PM (run 3), PI (run 7) and PMI (run 16) from Table 2

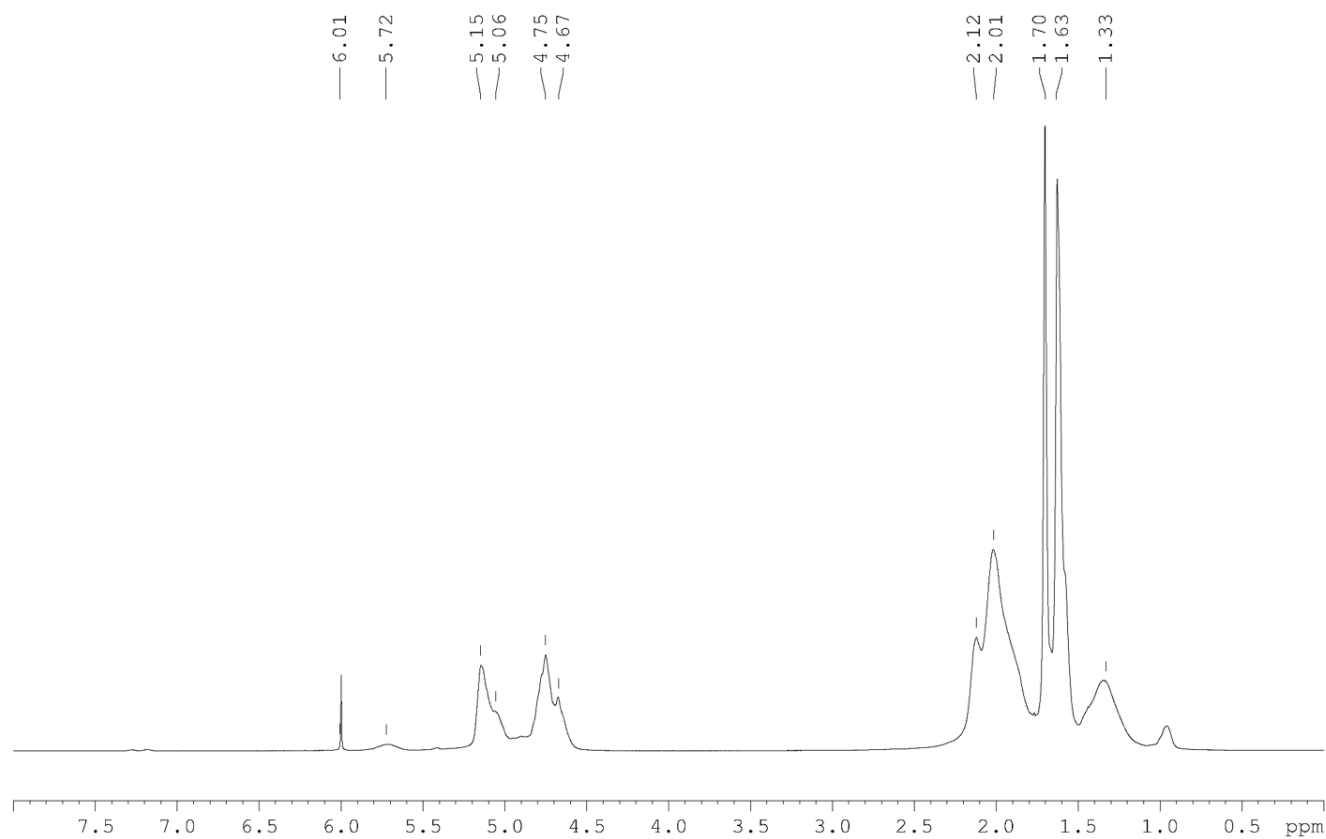

Figure S16. <sup>1</sup>H NMR spectrum (TCDE, 25 °C, 400 MHz) of PMI from run 16 of Table 2

# SUPPORTING INFORMATION

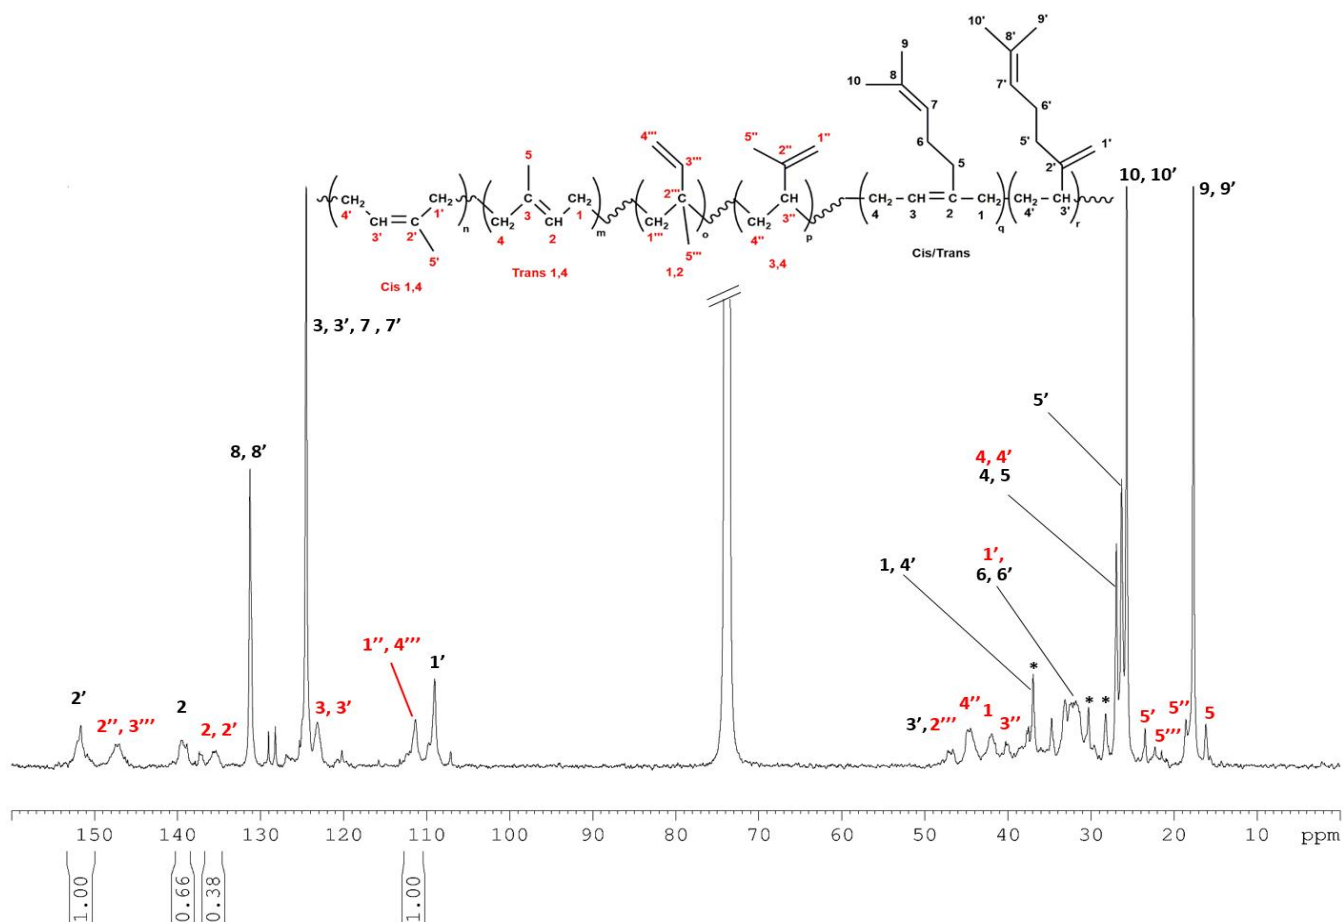

**Figure S17.**  $^{13}\text{C}$  NMR spectrum (TCDE, 25 °C, 400 MHz) of PMI from run 16 of Table 2

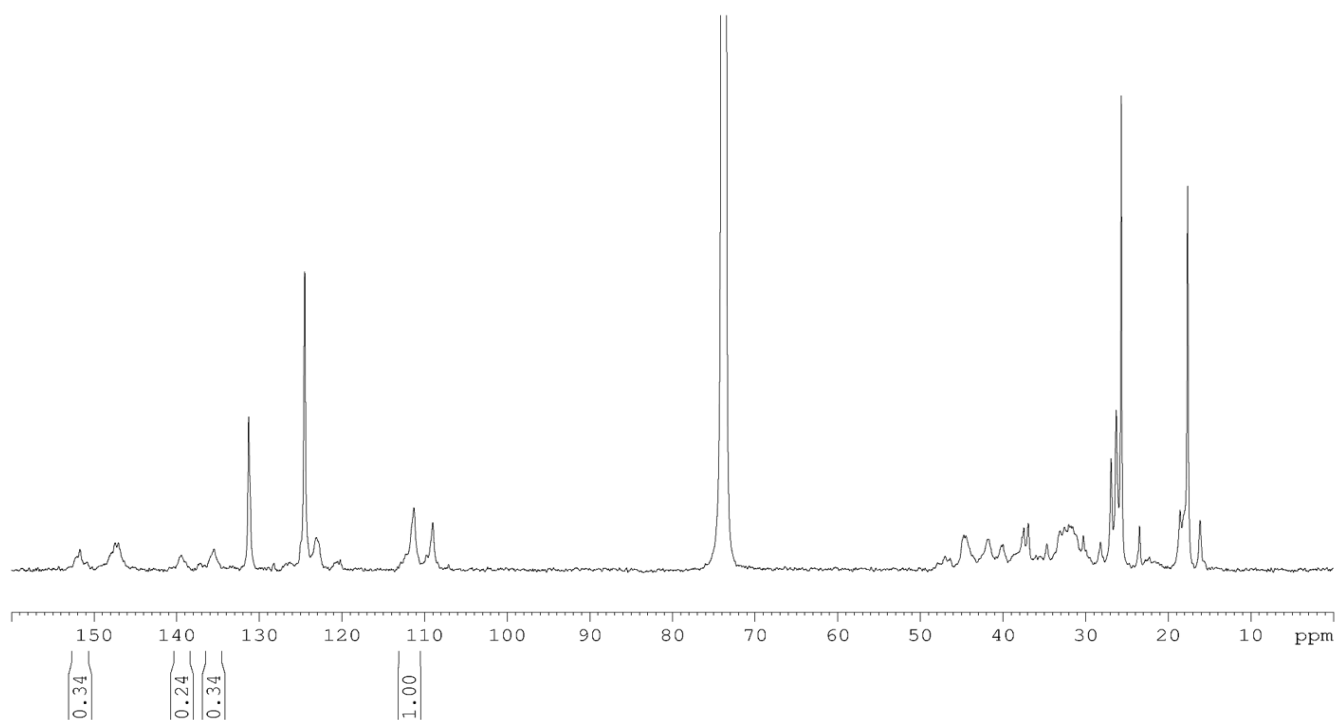

**Figure S18.**  $^{13}\text{C}$  NMR spectrum (TCDE, 25 °C, 400 MHz) of PMI from run 17 of Table 2

## SUPPORTING INFORMATION

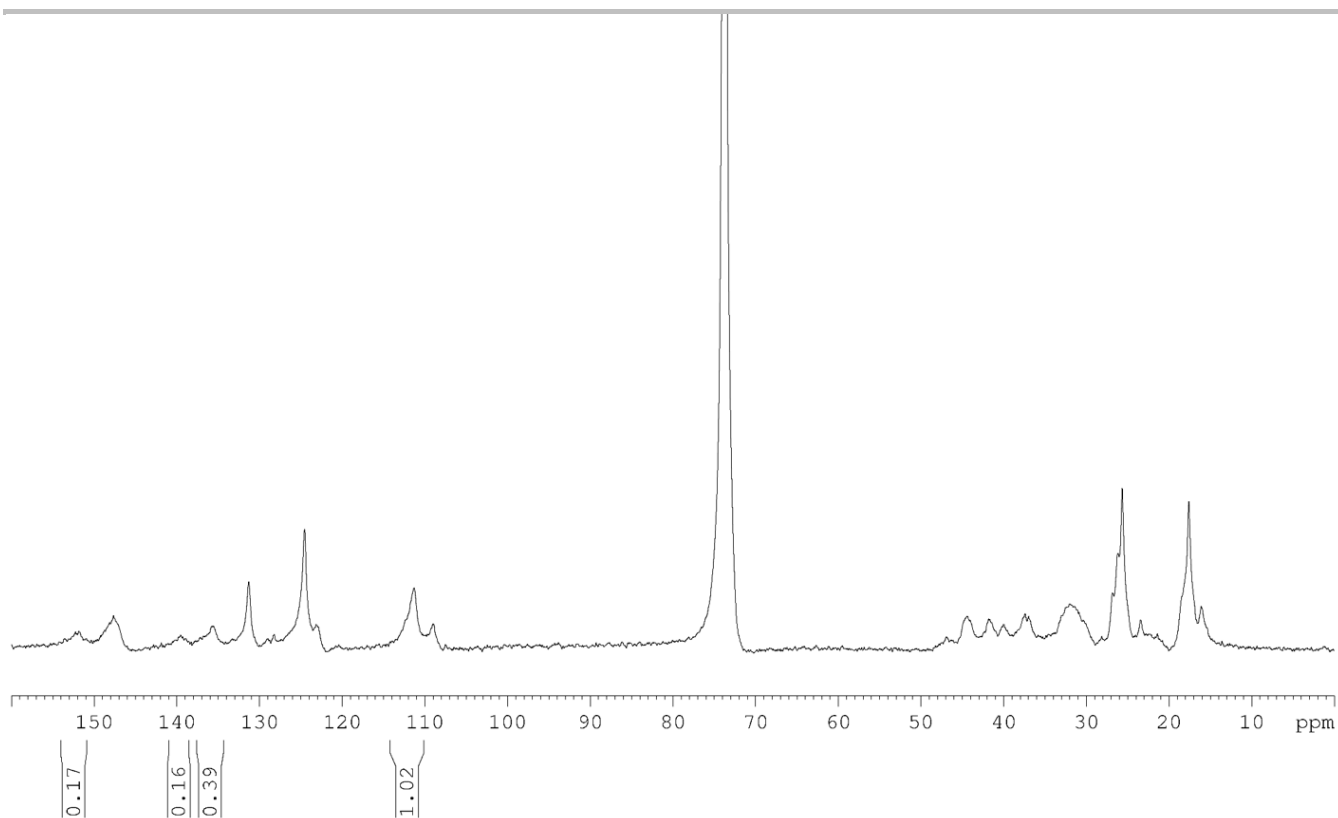

**Figure S19.** <sup>13</sup>C NMR spectrum (TCDE, 25 °C, 400 MHz) of PMI from run 18 of Table 2

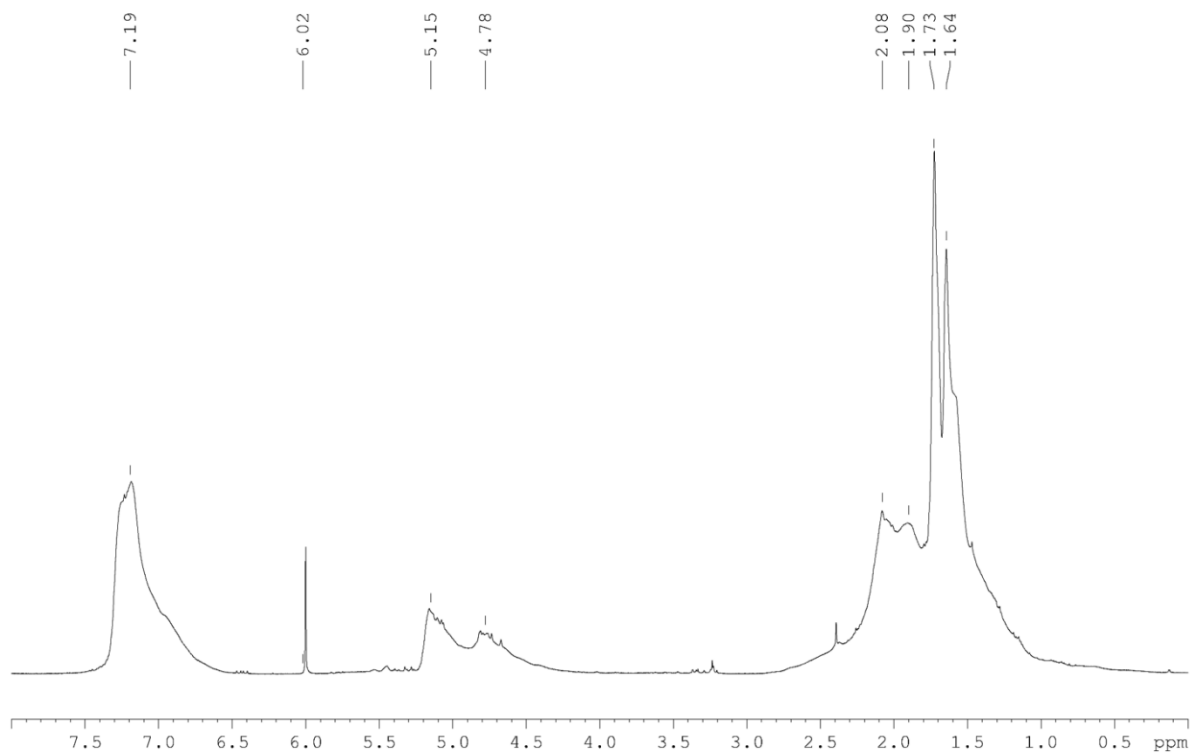

**Figure S20.** <sup>1</sup>H NMR spectrum (TCDE, 25 °C, 400 MHz) of PMSI from run 18 of Table 2

# SUPPORTING INFORMATION

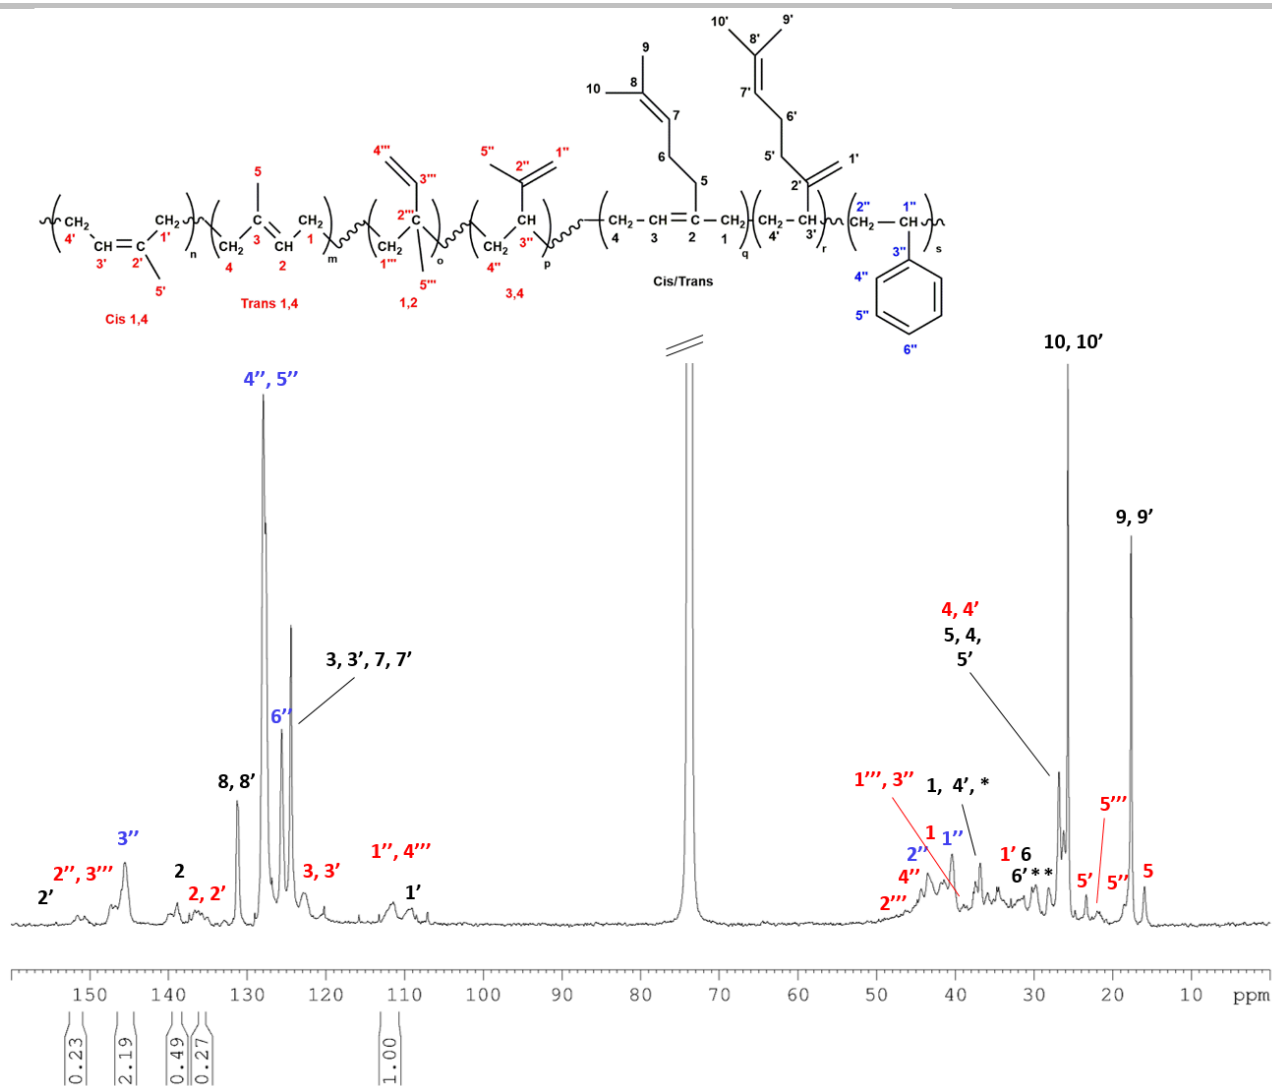

Figure S21.  $^{13}\text{C}$  NMR spectrum (TCDE, 25 °C, 400 MHz) of PMSI from run 18 of Table 2

## SUPPORTING INFORMATION

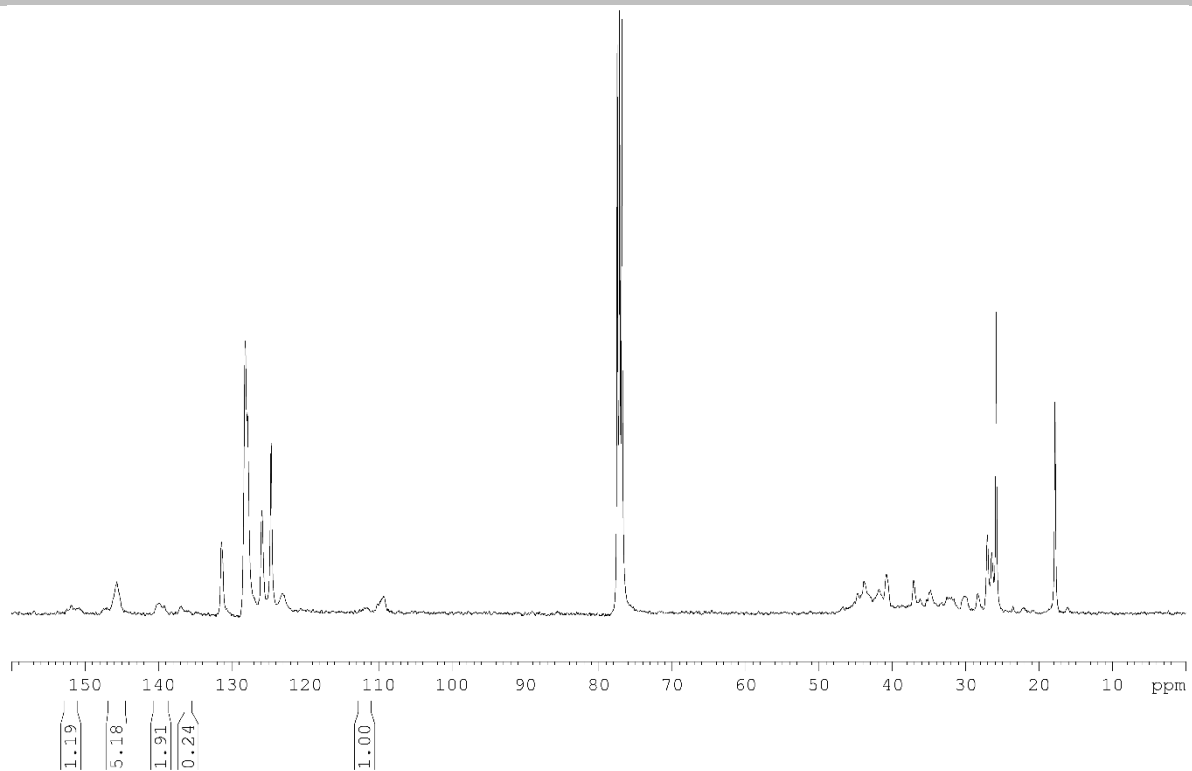

**Figure S22.**  $^{13}\text{C}$  NMR spectrum ( $\text{CDCl}_3$ , 25 °C, 400 MHz) of PMSI from run 19 of **Table 2**

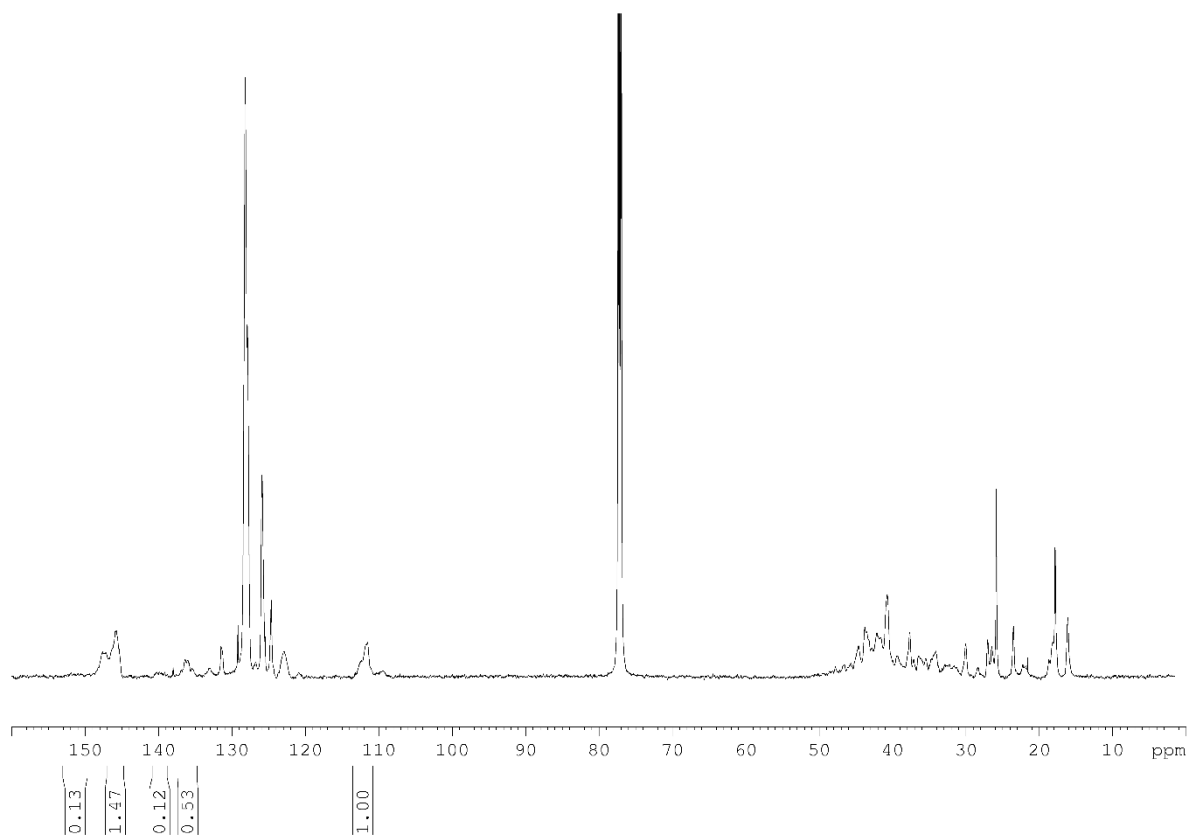

**Figure S23.**  $^{13}\text{C}$  NMR spectrum (TCDE, 25 °C, 400 MHz) of PMSI from run 20 of **Table 2**

## SUPPORTING INFORMATION

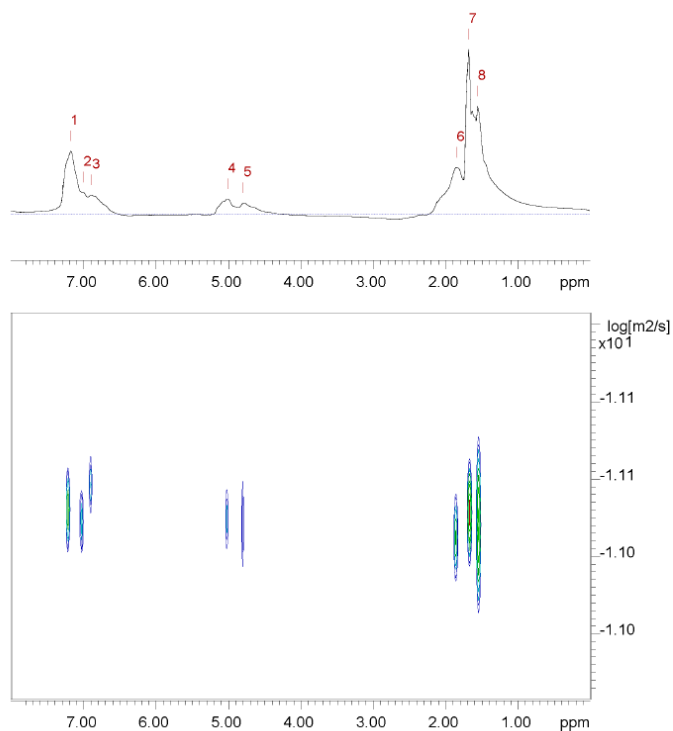

|                                        |                                                                                                                 |
|----------------------------------------|-----------------------------------------------------------------------------------------------------------------|
| Fitted function:                       | $f(x) = A * \exp(-D * x^2 * \gamma^2 * \text{littleDelta}^2 / (\text{bigDelta} - \text{littleDelta}/3) * 10^4)$ |
| used gamma:                            | 26752 rad/(s*Gauss)                                                                                             |
| used little delta:                     | 0.0050000 s                                                                                                     |
| used big delta:                        | 0.14990 s                                                                                                       |
| used gradient strength:                | variable                                                                                                        |
| Random error estimation of data:       | RMS per spectrum (or trace/plane)                                                                               |
| Systematic error estimation of data:   | worst case per peak scenario                                                                                    |
| Fit parameter Error estimation method: | from fit using arbitrary y uncertainties                                                                        |
| Confidence level:                      | 95%                                                                                                             |
| Used peaks:                            | automatically picked peaks                                                                                      |
| Used integrals:                        | peak intensities                                                                                                |
| Used Gradient strength:                | all values (including replicates) used                                                                          |

| Peak name | F2 [ppm] | D [m2/s] | error     |
|-----------|----------|----------|-----------|
| 1         | 7.190    | 8.09e-12 | 3.034e-13 |
| 2         | 7.008    | 8.28e-12 | 3.385e-13 |
| 3         | 6.889    | 7.89e-12 | 2.786e-13 |
| 4         | 5.013    | 8.62e-12 | 3.627e-13 |
| 5         | 4.795    | 9.39e-12 | 7.118e-13 |
| 6         | 1.854    | 8.84e-12 | 3.726e-13 |
| 7         | 1.683    | 8.57e-12 | 3.458e-13 |
| 8         | 1.558    | 8.74e-12 | 6.227e-13 |

**Figure S24.** DOSY NMR spectrum (CDCl<sub>3</sub>, 25 °C, 600 MHz) of PMS copolymers from run 13 of **Table 2**



# SUPPORTING INFORMATION

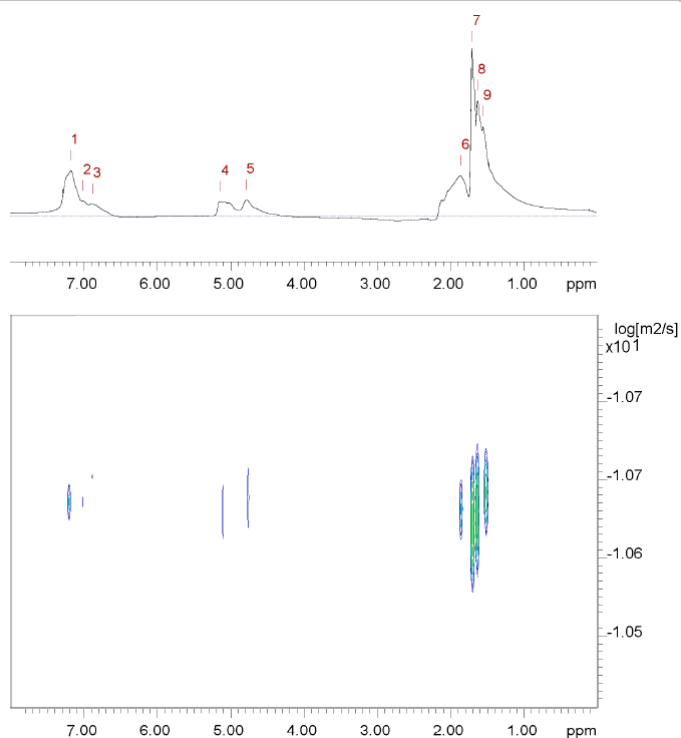

|                                        |                                                                                                                   |
|----------------------------------------|-------------------------------------------------------------------------------------------------------------------|
| Fitted function:                       | $f(x) = A * \exp(-D * x^2 * \gamma^2 * \text{littleDelta}^2 / (\text{bigDelta} - \text{littleDelta} / 3) * 10^4)$ |
| used gamma:                            | 26752 rad/(s*Gauss)                                                                                               |
| used little delta:                     | 0.0050000 s                                                                                                       |
| used big delta:                        | 0.14990 s                                                                                                         |
| used gradient strength:                | variable                                                                                                          |
| Random error estimation of data:       | RMS per spectrum (or trace/plane)                                                                                 |
| Systematic error estimation of data:   | worst case per peak scenario                                                                                      |
| Fit parameter Error estimation method: | from fit using arbitray y uncertainties                                                                           |
| Confidence level:                      | 95%                                                                                                               |
| Used peaks:                            | automatically picked peaks                                                                                        |
| Used integrals:                        | peak intensities                                                                                                  |
| Used Gradient strength:                | all values (including replicates) used                                                                            |

| Peak name | F2 [ppm] | D [m2/s] | error     |
|-----------|----------|----------|-----------|
| 1         | 7.190    | 2.05e-11 | 6.259e-13 |
| 2         | 7.018    | 2.05e-11 | 5.955e-13 |
| 3         | 6.883    | 1.97e-11 | 3.899e-13 |
| 4         | 5.138    | 2.97e-11 | 3.340e-12 |
| 5         | 4.790    | 2.79e-11 | 2.901e-12 |
| 6         | 1.859    | 2.29e-11 | 1.212e-12 |
| 7         | 1.709    | 2.62e-11 | 2.167e-12 |
| 8         | 1.636    | 2.59e-11 | 2.299e-12 |
| 9         | 1.558    | 2.20e-11 | 1.393e-12 |

**Figure S25.** DOSY NMR spectrum (CDCl<sub>3</sub>, 25 °C, 600 MHz) of PMS diblock copolymers from run of 21 **Table 2**

## SUPPORTING INFORMATION

### 4. DSC Thermal Analysis

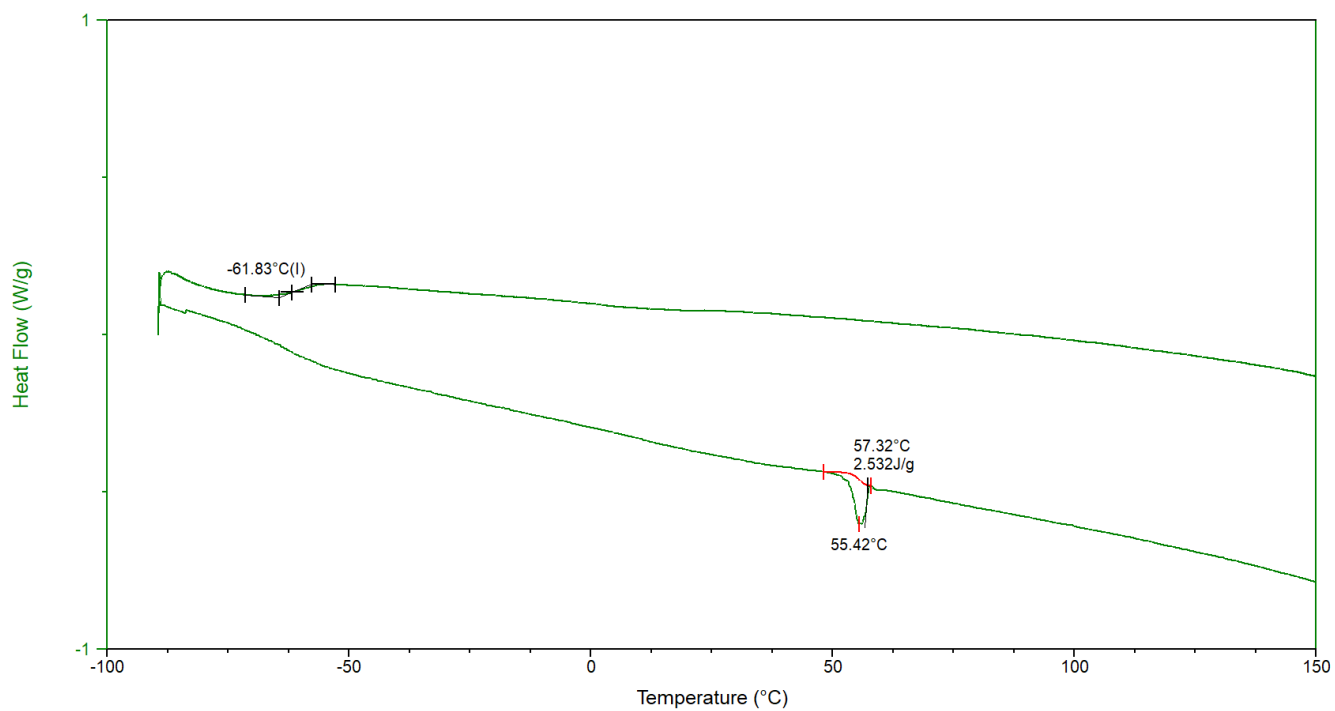

Figure S26. DSC thermogram of PM from run 1 of Table 1.

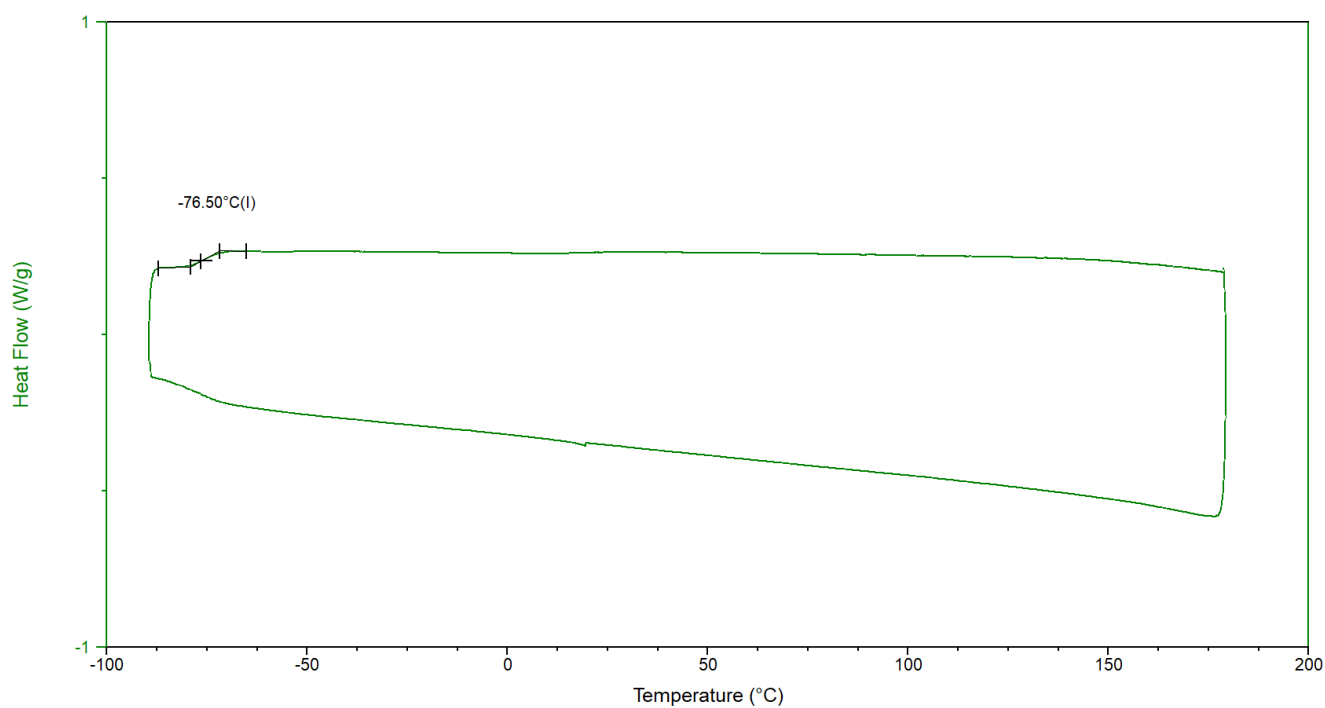

Figure S27. DSC thermogram of PM from run 4 of Table 1.

## SUPPORTING INFORMATION

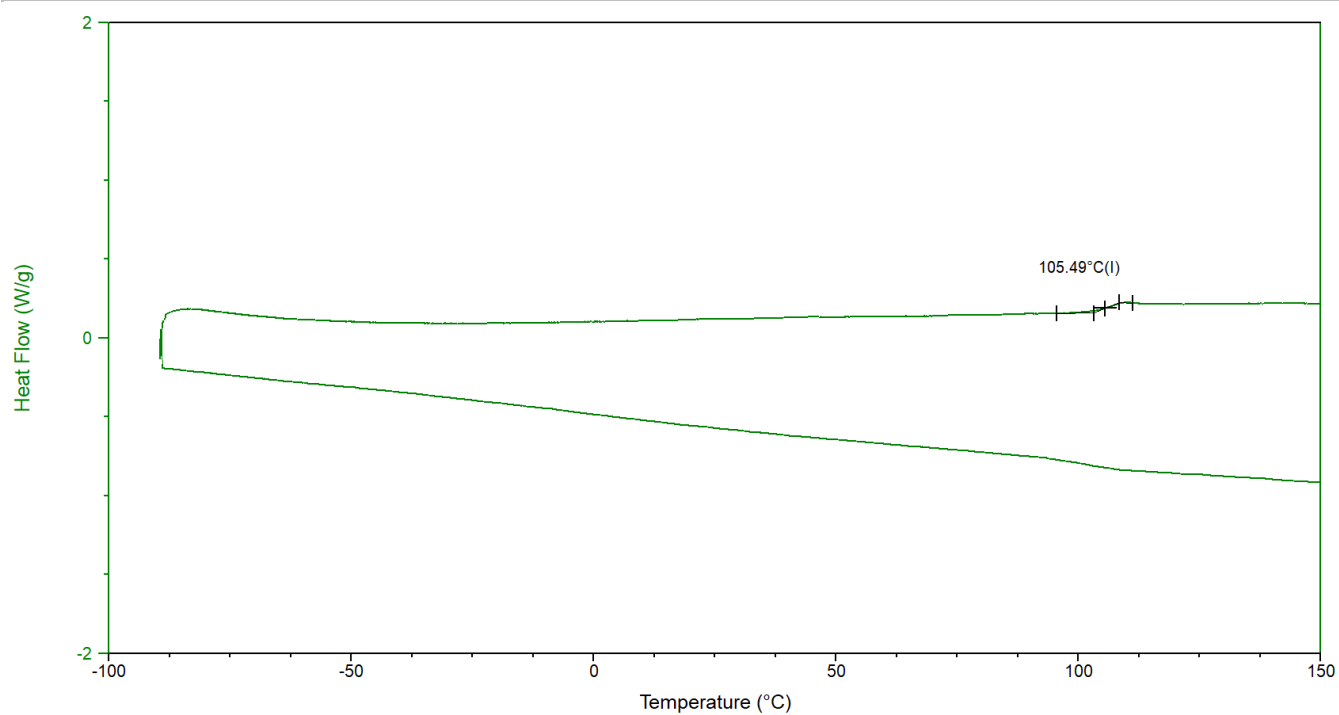

**Figure S28.** DSC thermogram of PS from run 5 of **Table 1**.

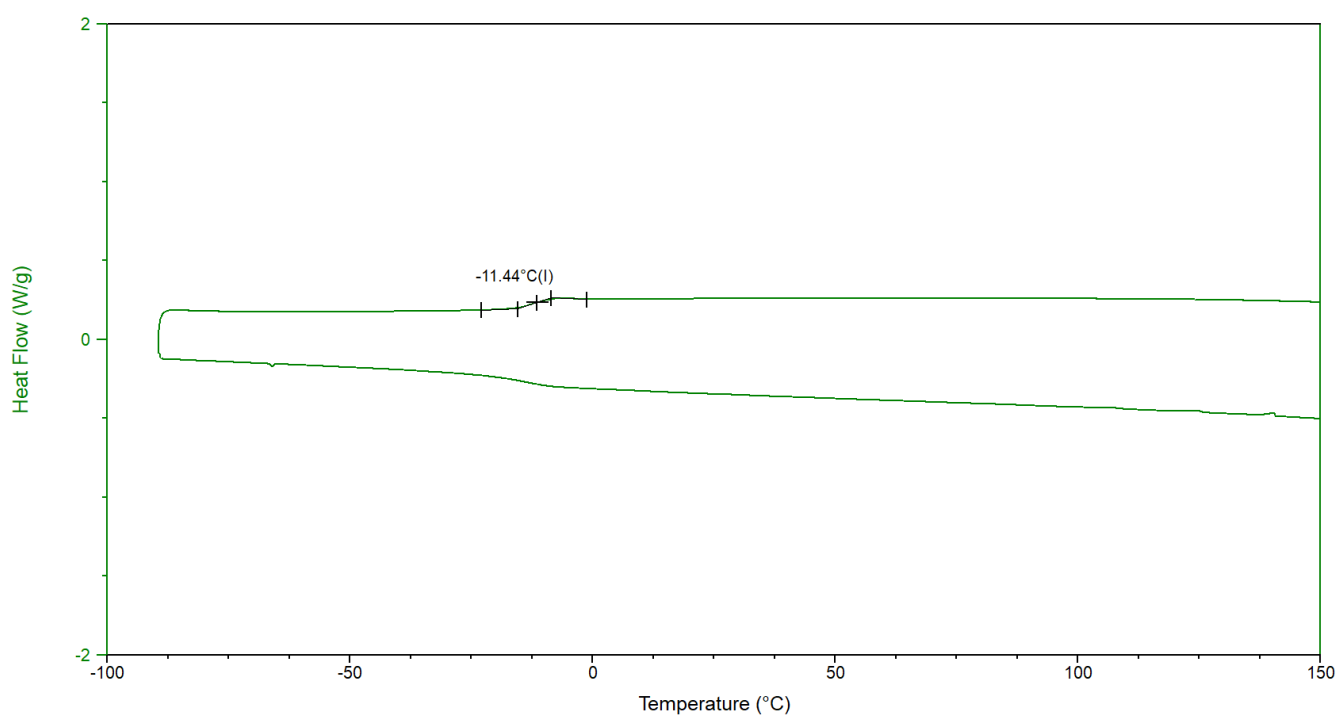

**Figure S29.** DSC thermogram of PI from run 8 of **Table 1**.

## SUPPORTING INFORMATION

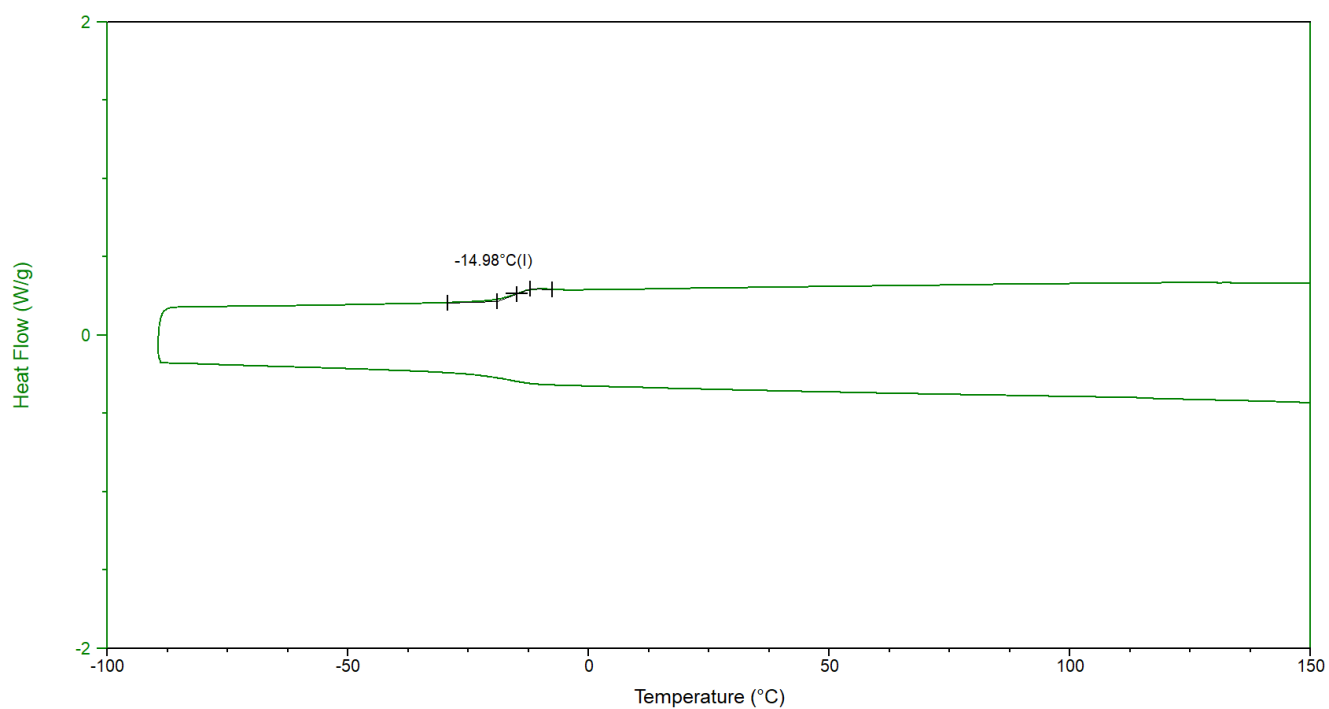

**Figure S30.** DSC thermogram of PI from run 9 of **Table 1**.

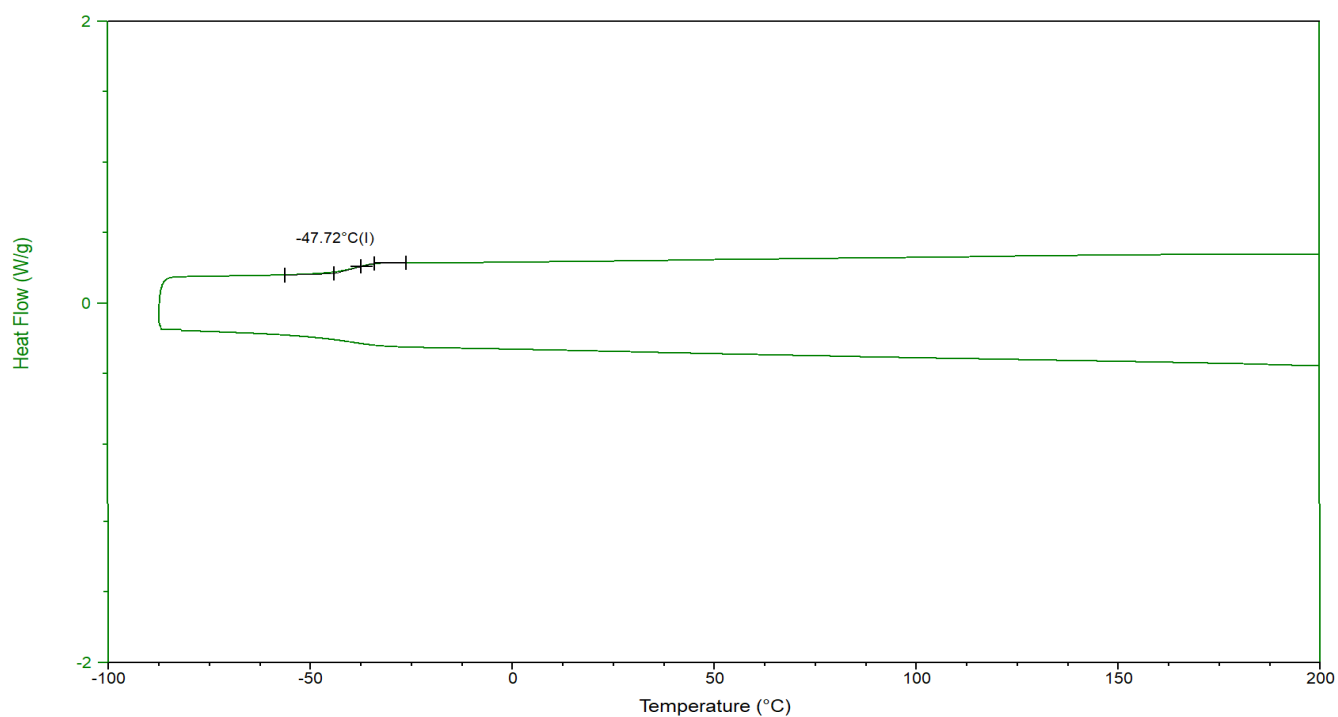

**Figure S31.** DSC thermogram of PMS from run 10 of **Table 2**.

## SUPPORTING INFORMATION

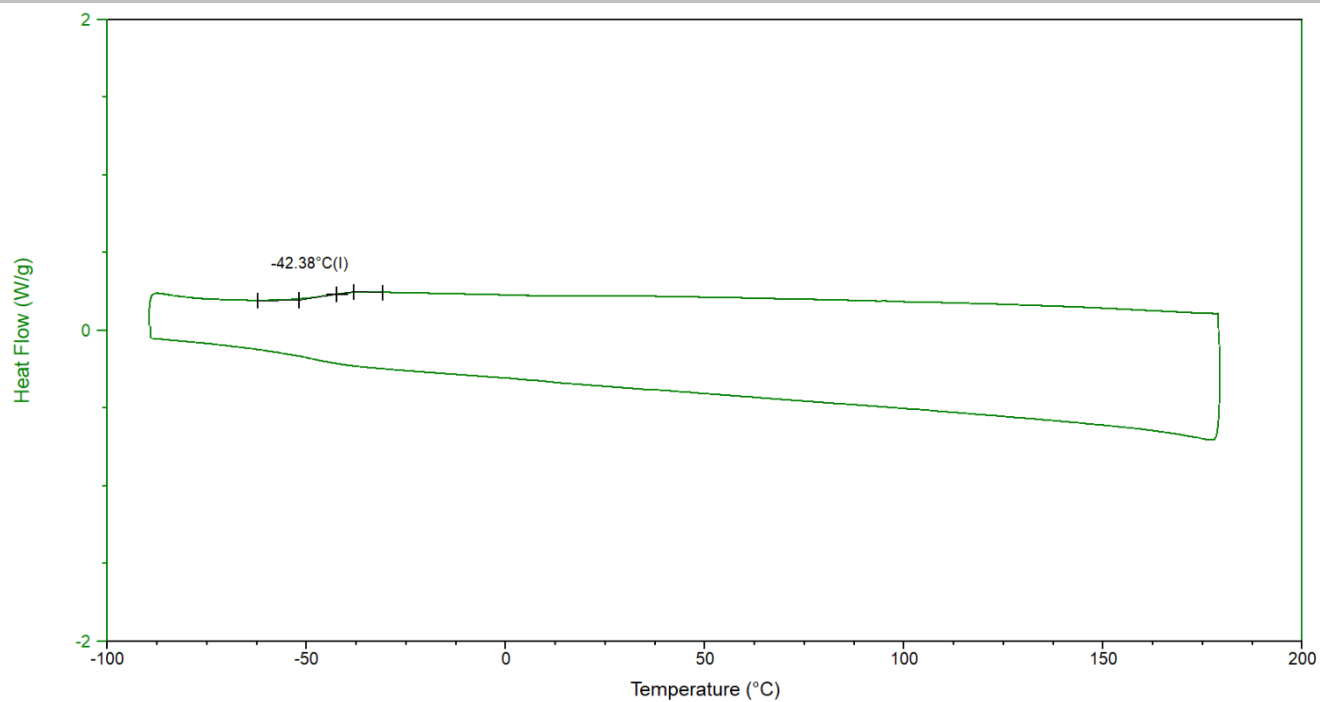

**Figure S32.** DSC thermogram of PMS from run 12 of **Table 2**.

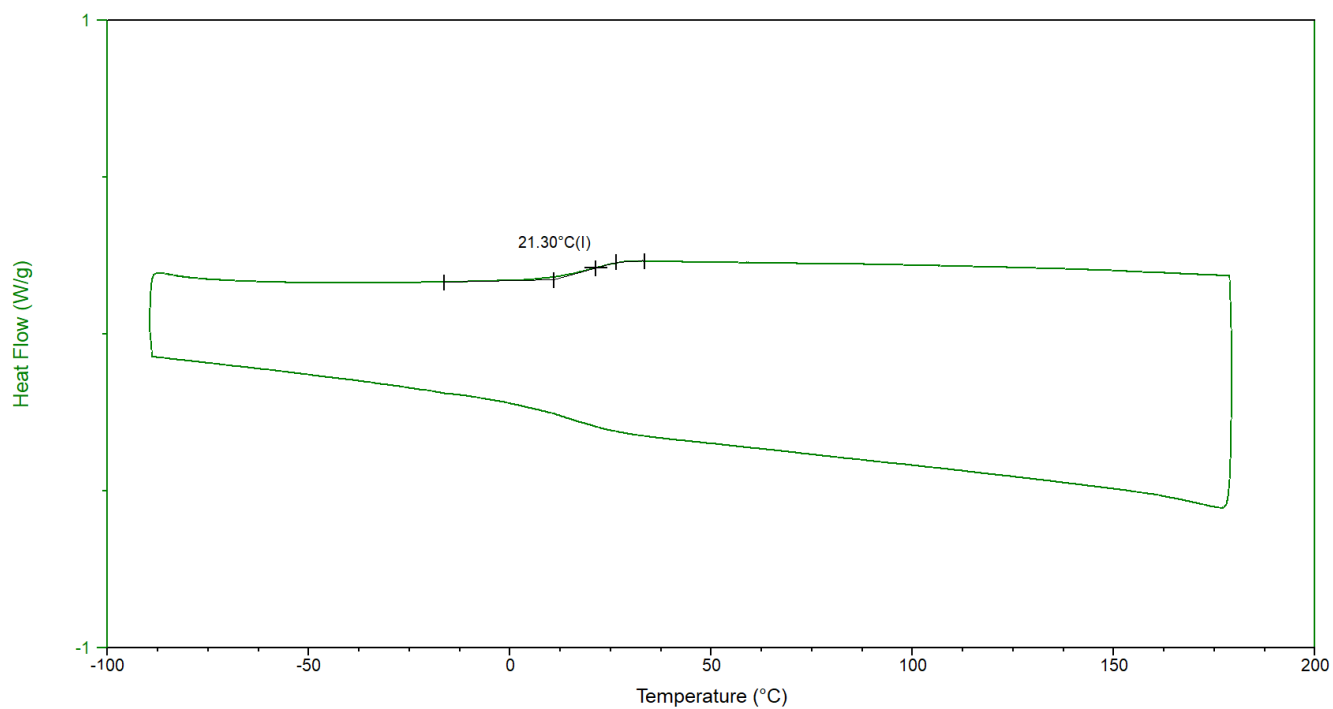

**Figure S33.** DSC thermogram of PMS from run 14 of **Table 2**.

## SUPPORTING INFORMATION

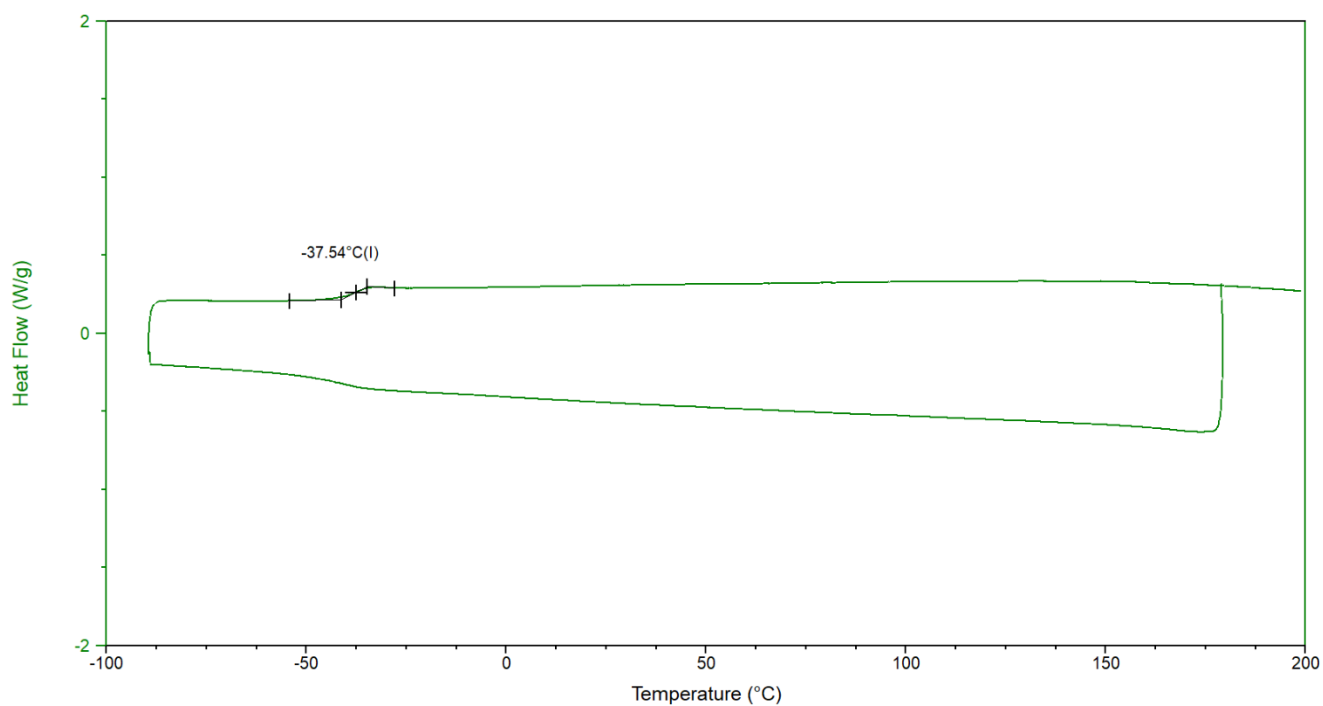

**Figure S34.** DSC thermogram of PMI from run 16 of Table 2.

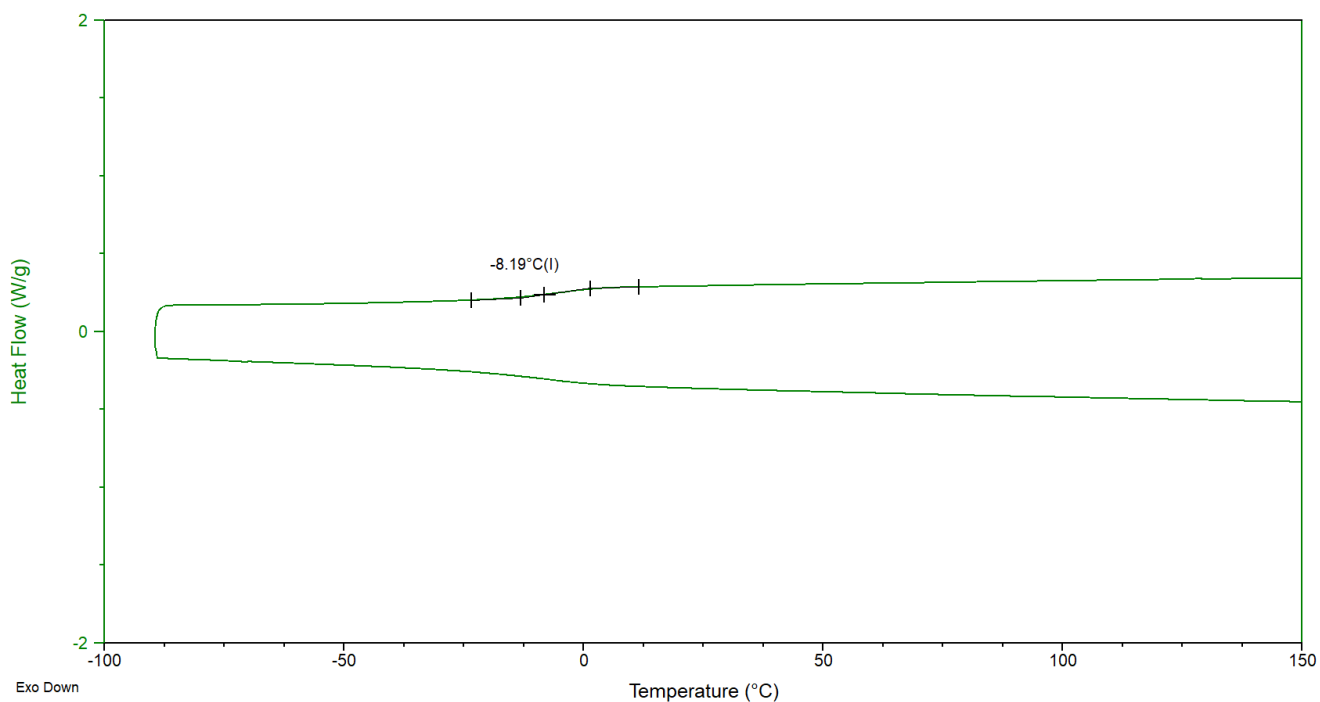

**Figure S35.** DSC thermogram of PMSI from run 18 of Table 2.

## SUPPORTING INFORMATION

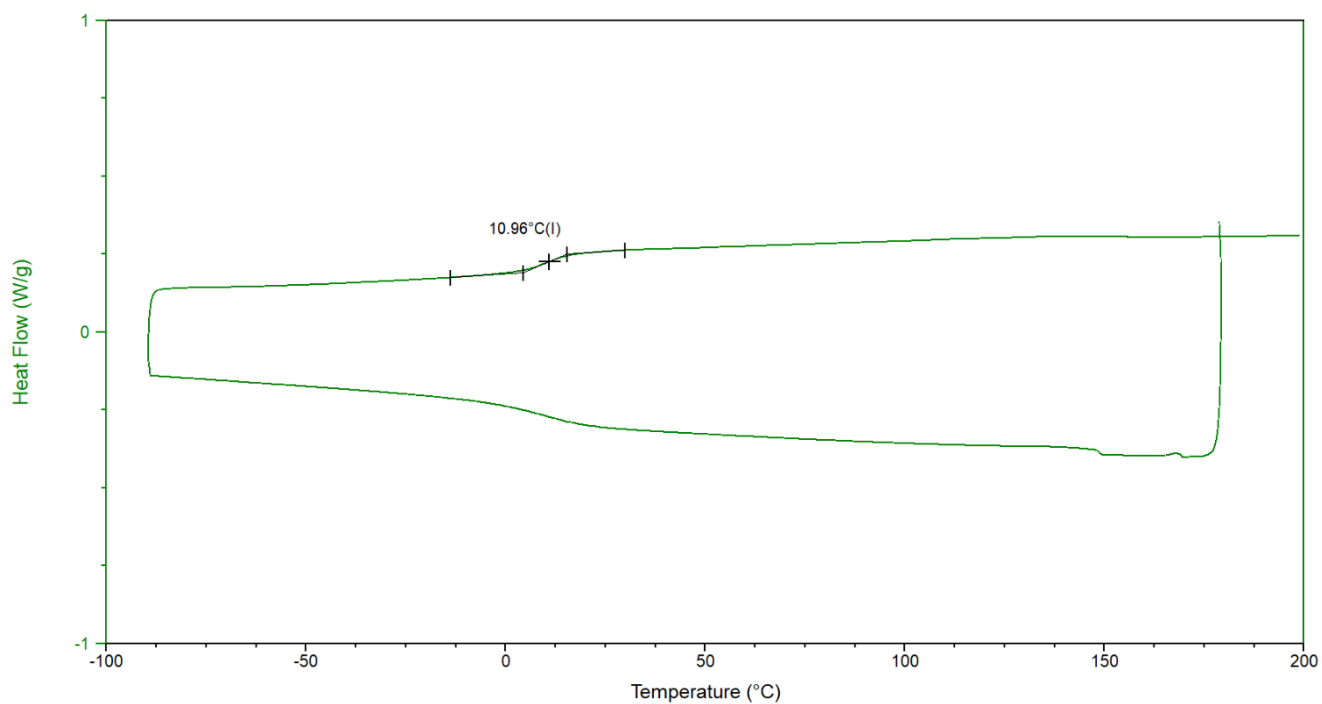

**Figure S36.** DSC thermogram of PMSI from run 20 of Table 2.

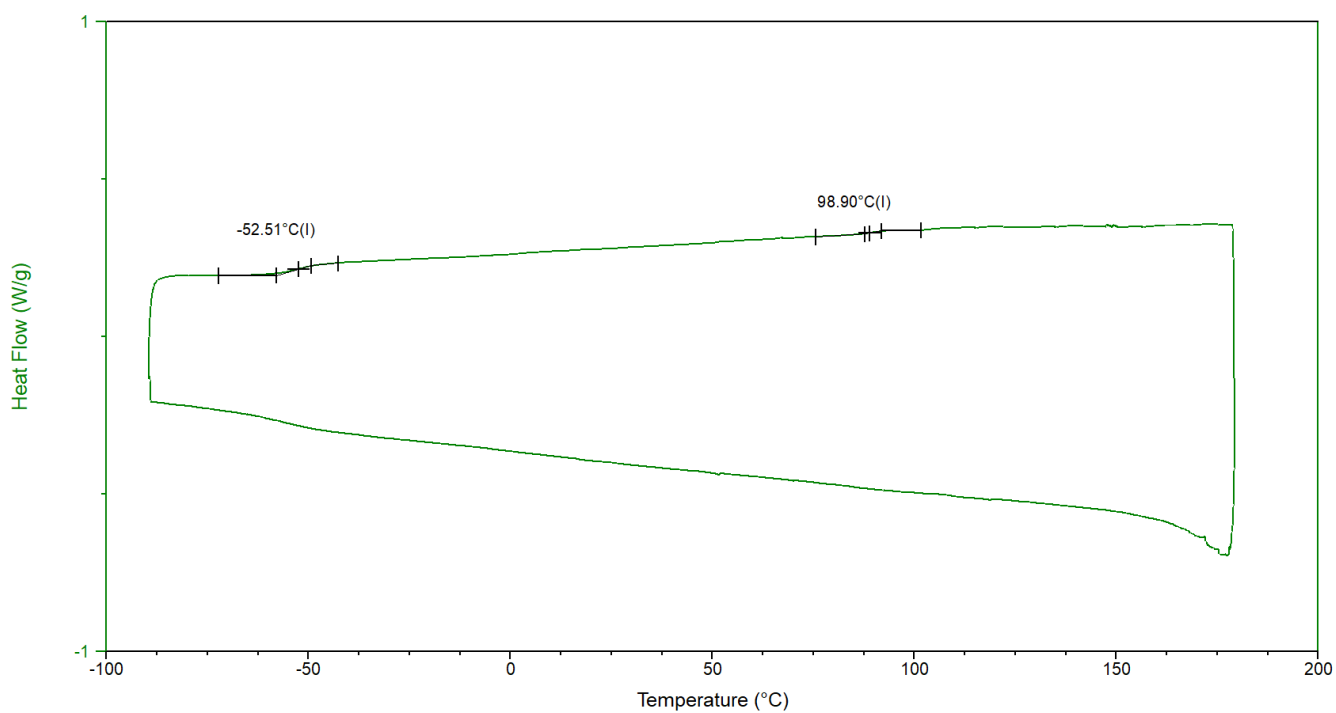

**Figure S37.** DSC thermogram of diblock PMS from run 21 of Table 2.

## 5. TGA Analysis

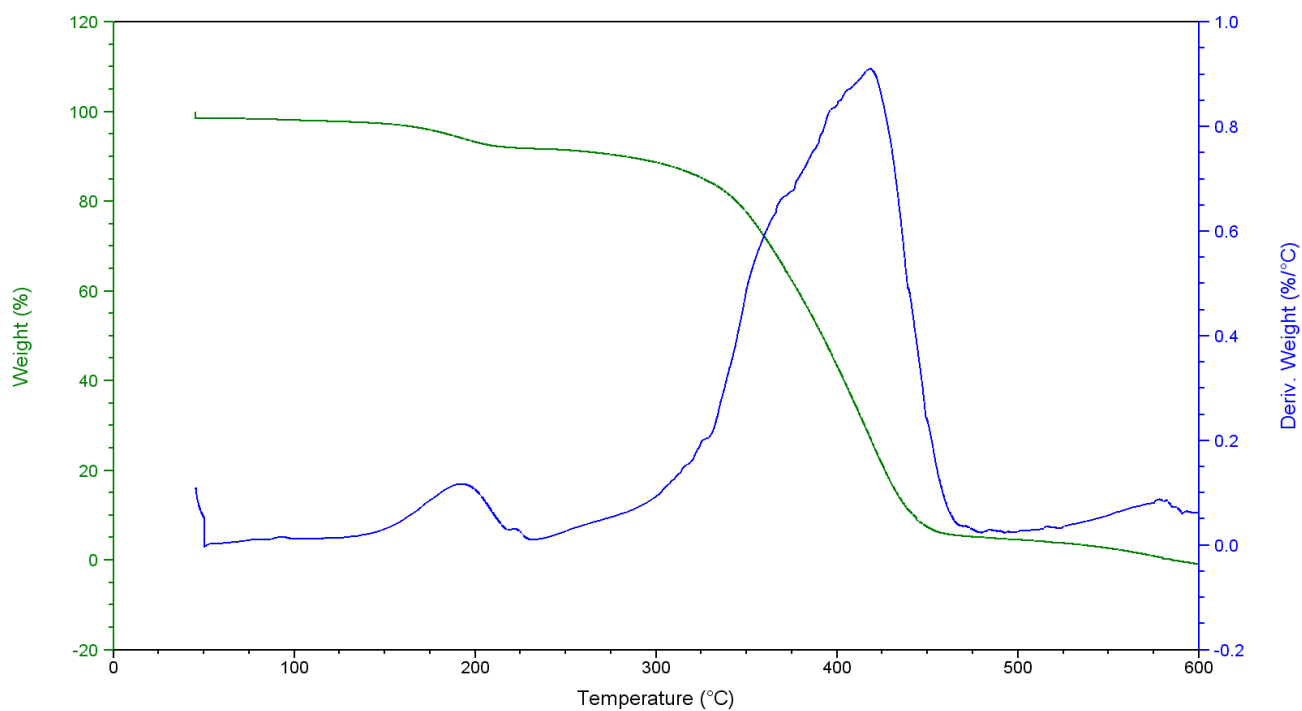

Figure S38. TGA thermogram of PM from run 1 of Table 1.

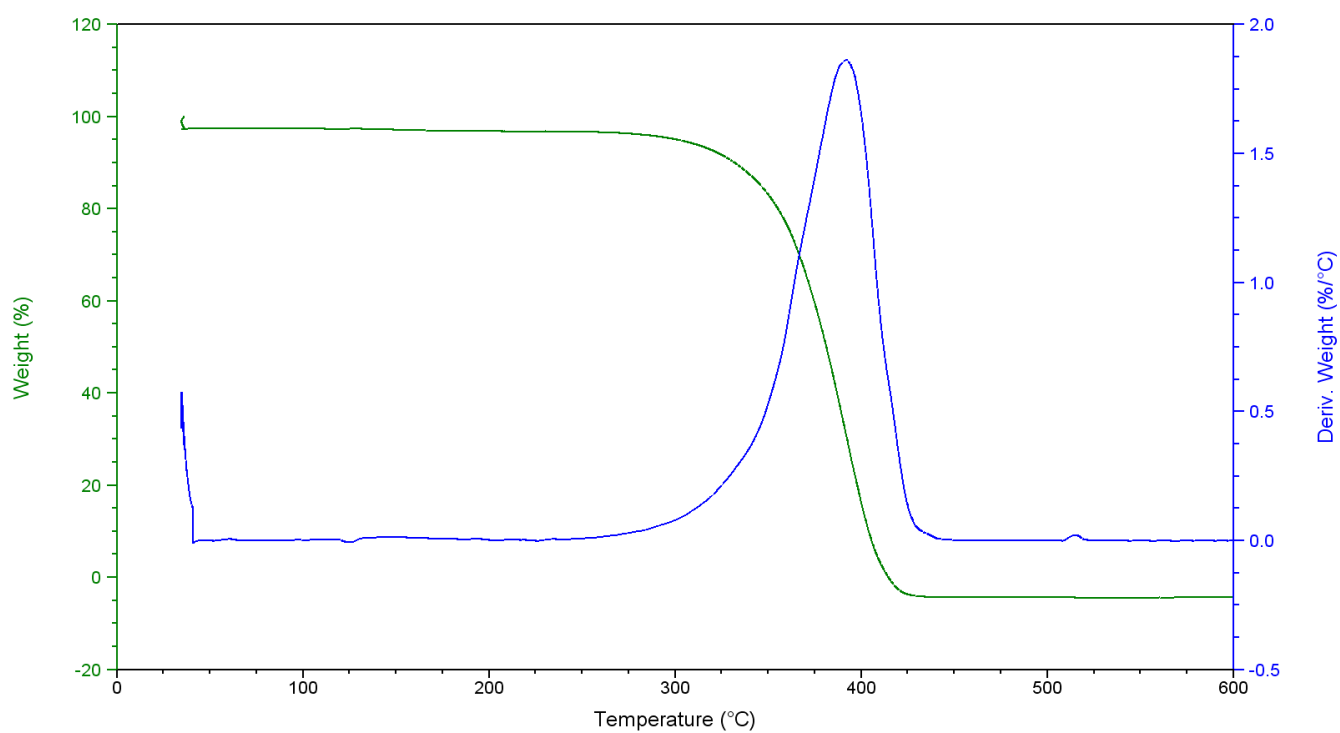

Figure S39. TGA thermogram of PS from run 5 of Table 1.



## SUPPORTING INFORMATION

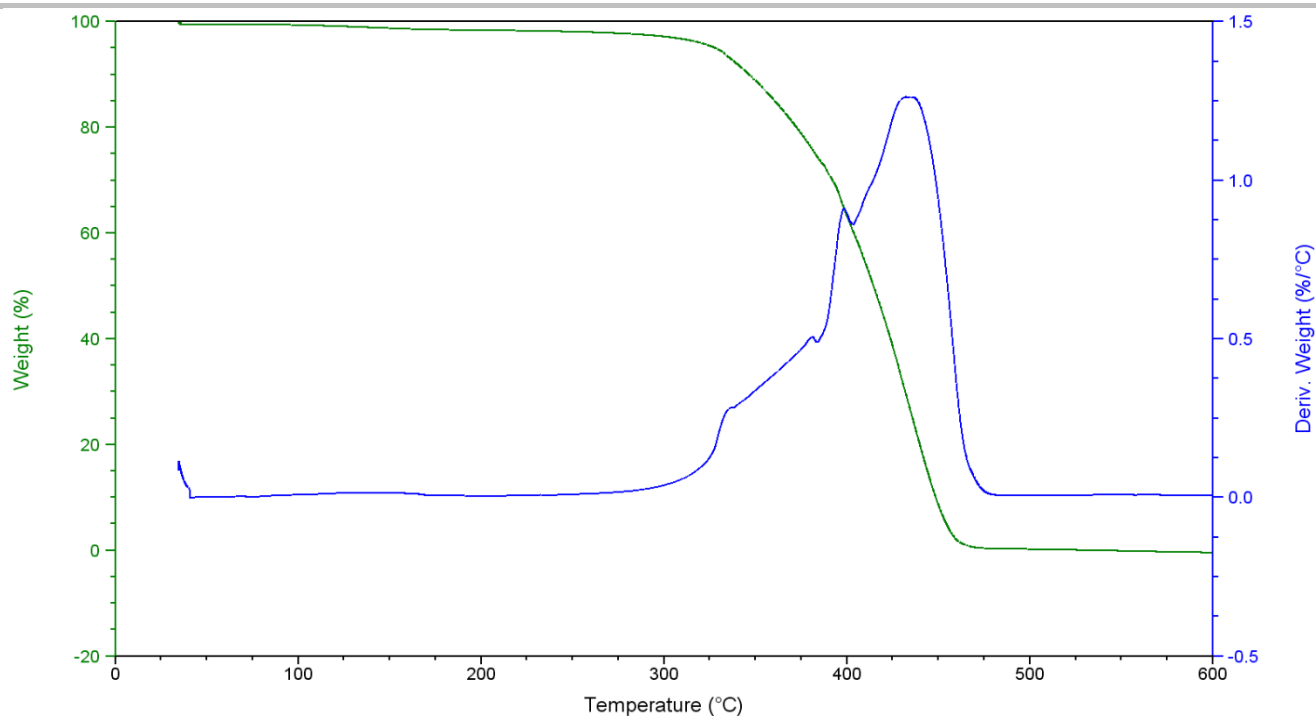

**Figure S40.** TGA thermogram of PI from run 8 of **Table 1**.

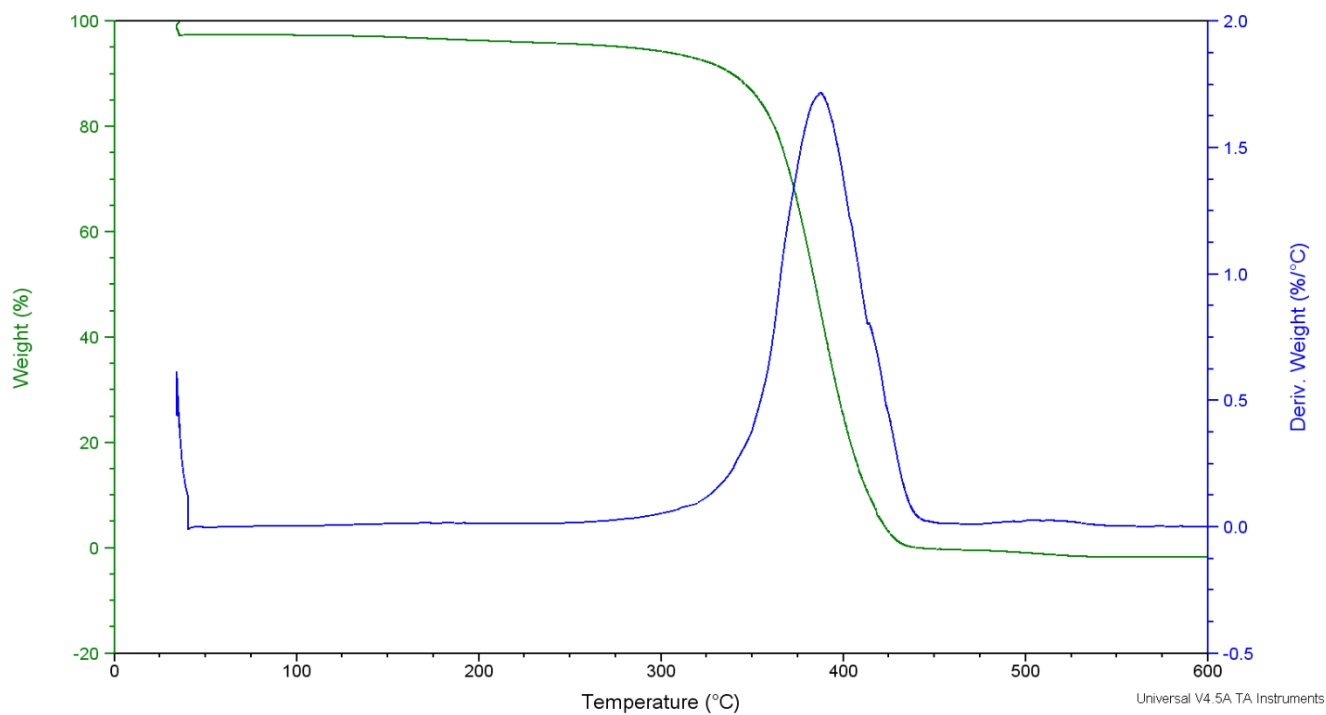

**Figure S41.** TGA thermogram of PMS from run 12 of **Table 2**.

## SUPPORTING INFORMATION

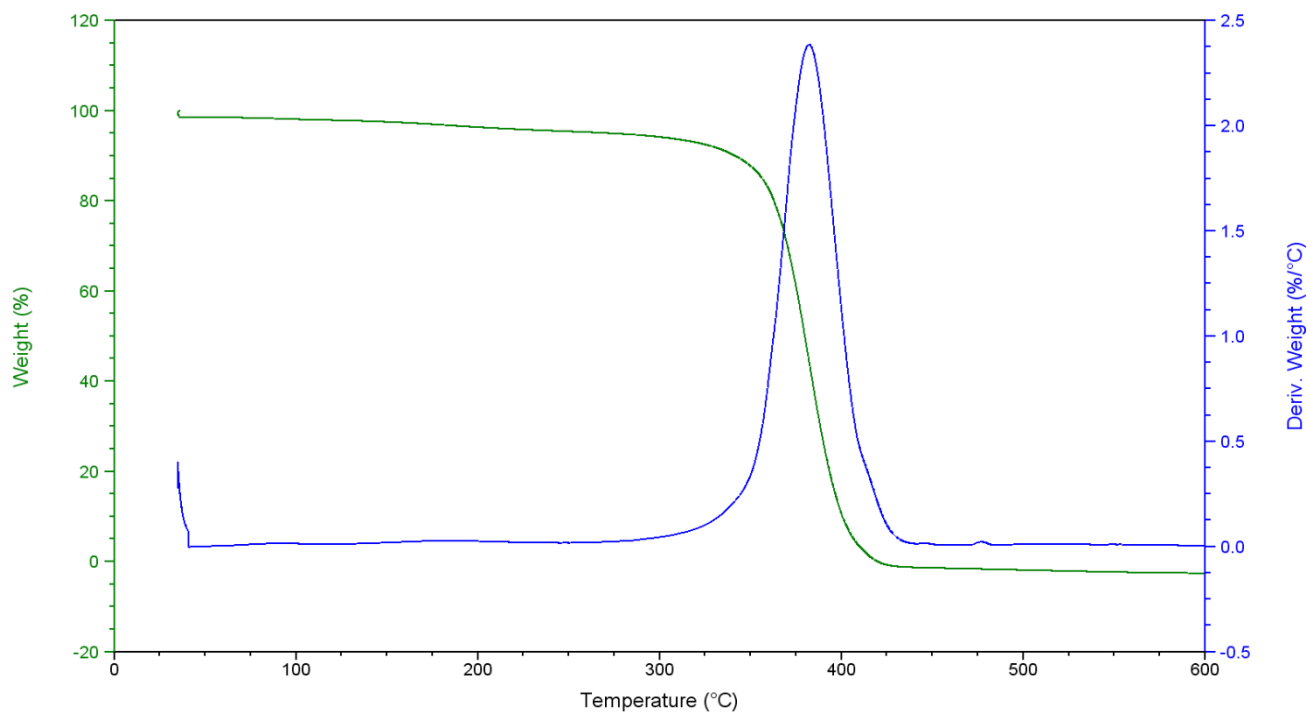

Figure S42. TGA thermogram of PMS from run 14 of Table 2.

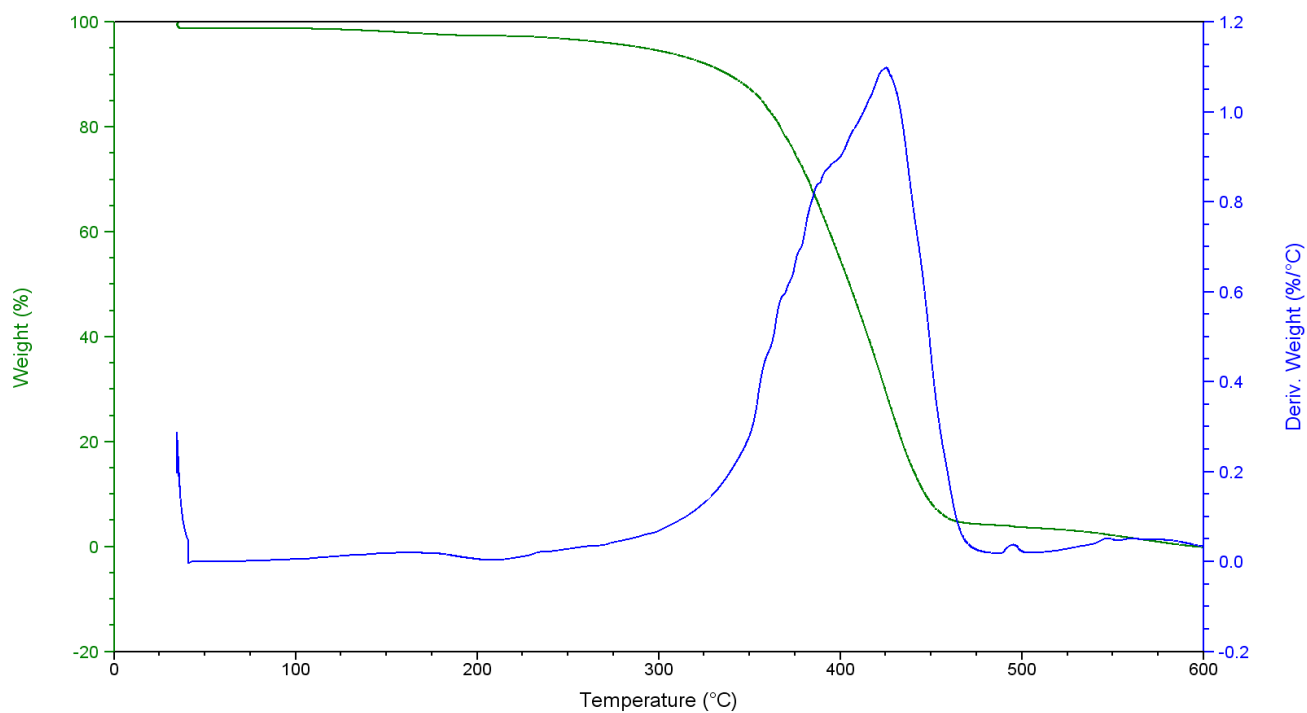

Figure S43. TGA thermogram of PMI from run 15 of Table 2.

## SUPPORTING INFORMATION

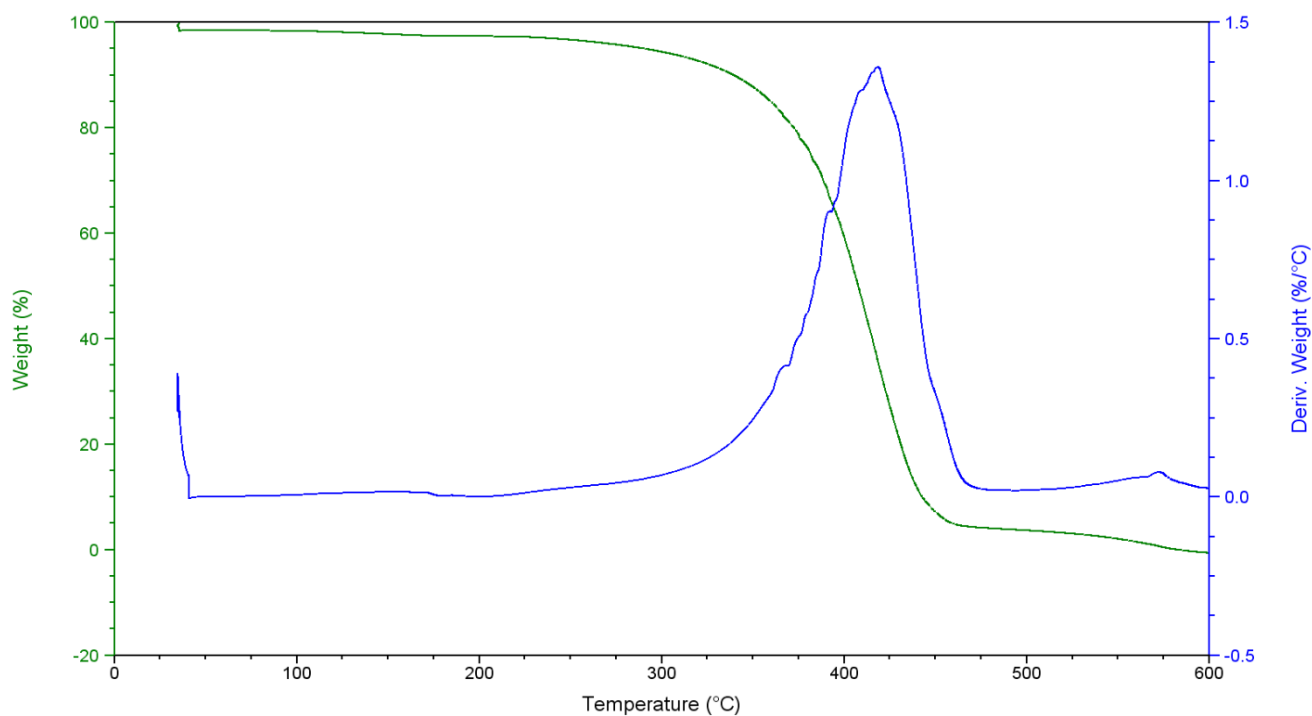

**Figure S44.** TGA thermogram of PMI from run 16 of Table 2.

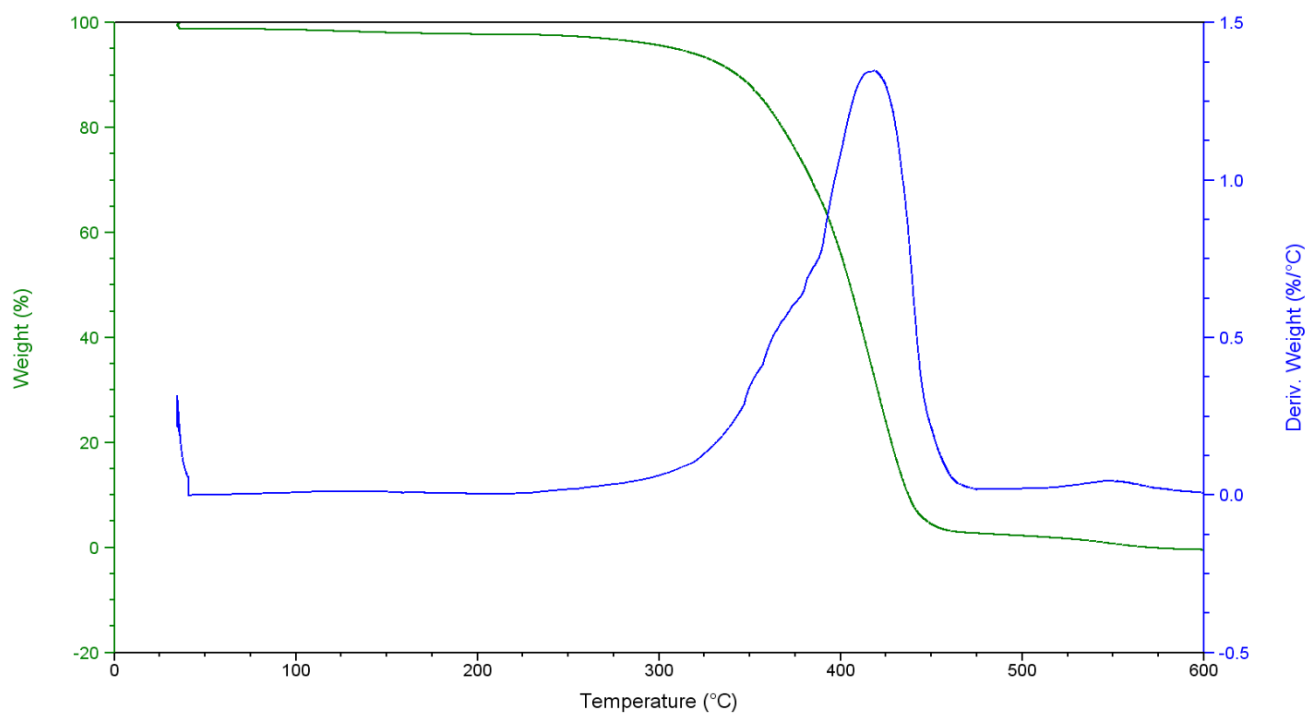

**Figure S45.** TGA thermogram of PMI from run 17 of Table 2.

## SUPPORTING INFORMATION

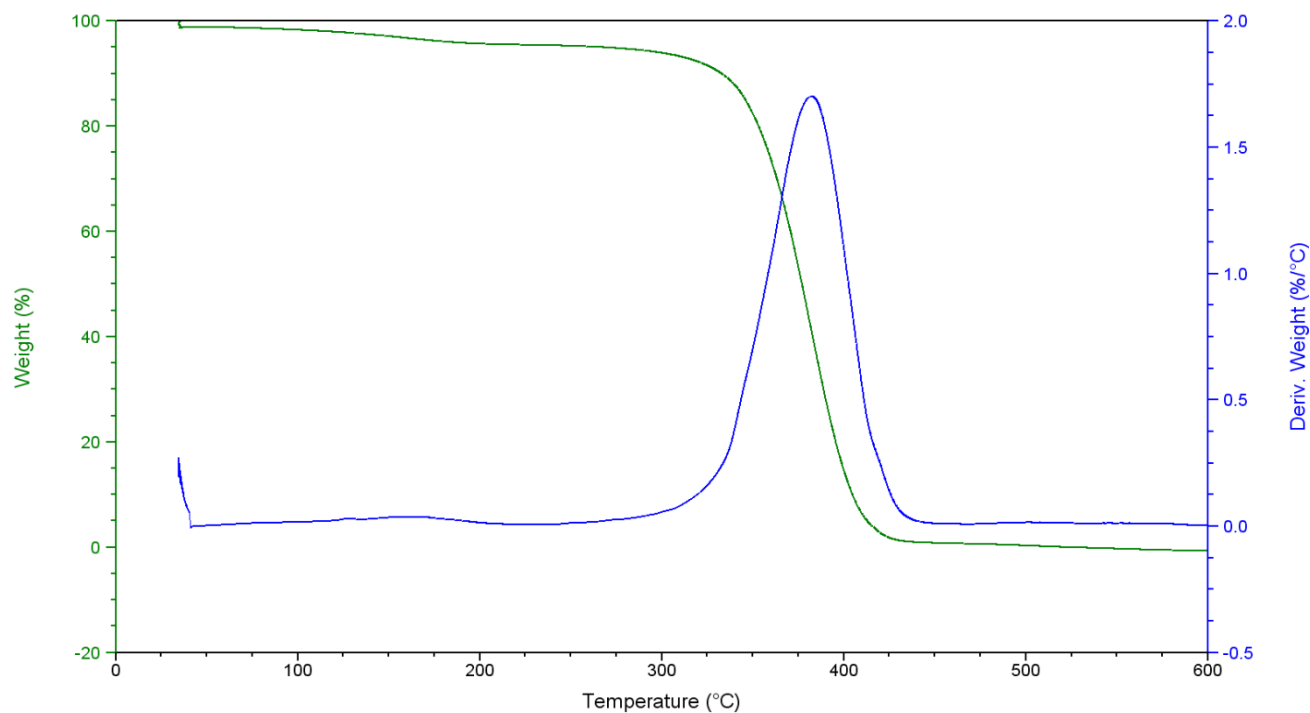

**Figure S46.** TGA thermogram of PMSI from run 20 of Table 2.

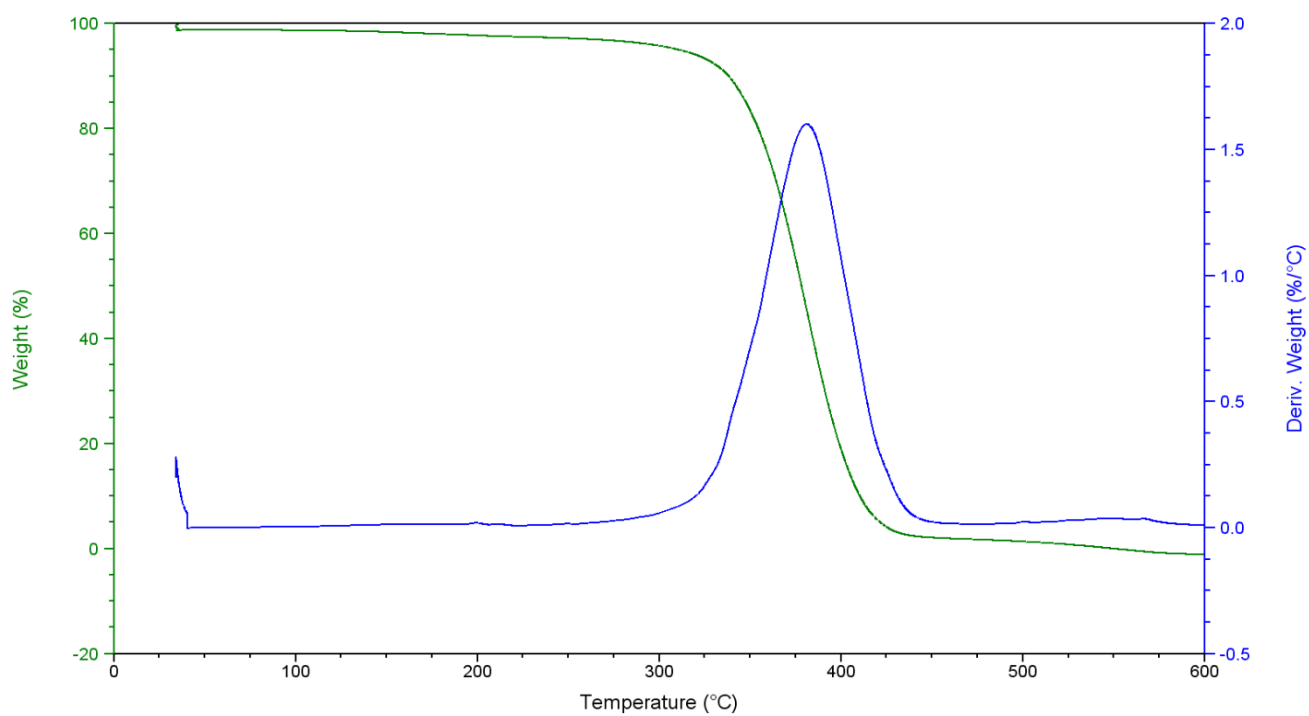

**Figure S47.** TGA thermogram of diblock PMS from run 21 of Table 2.

## SUPPORTING INFORMATION

### 6. GPC Analysis

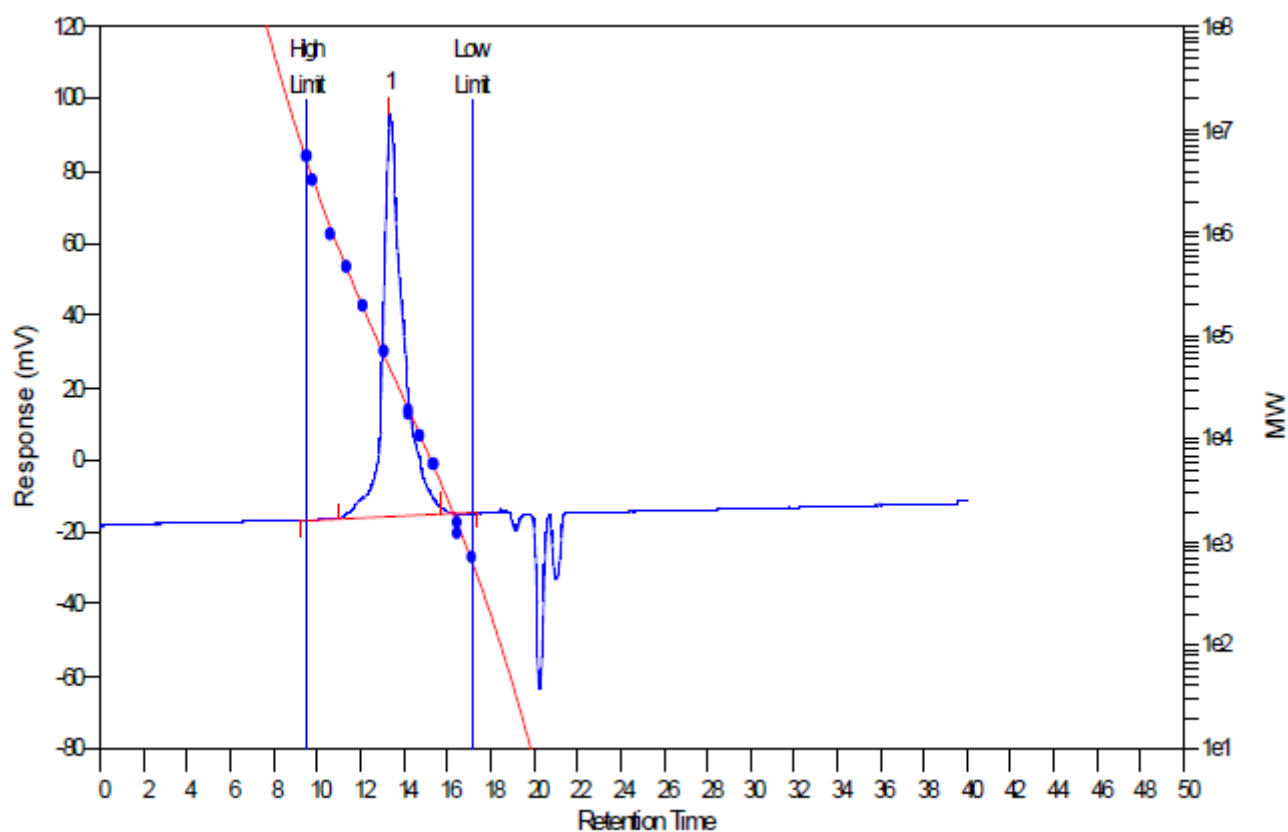

Figure S48. GPC curve of PM from run 1 of Table 1.

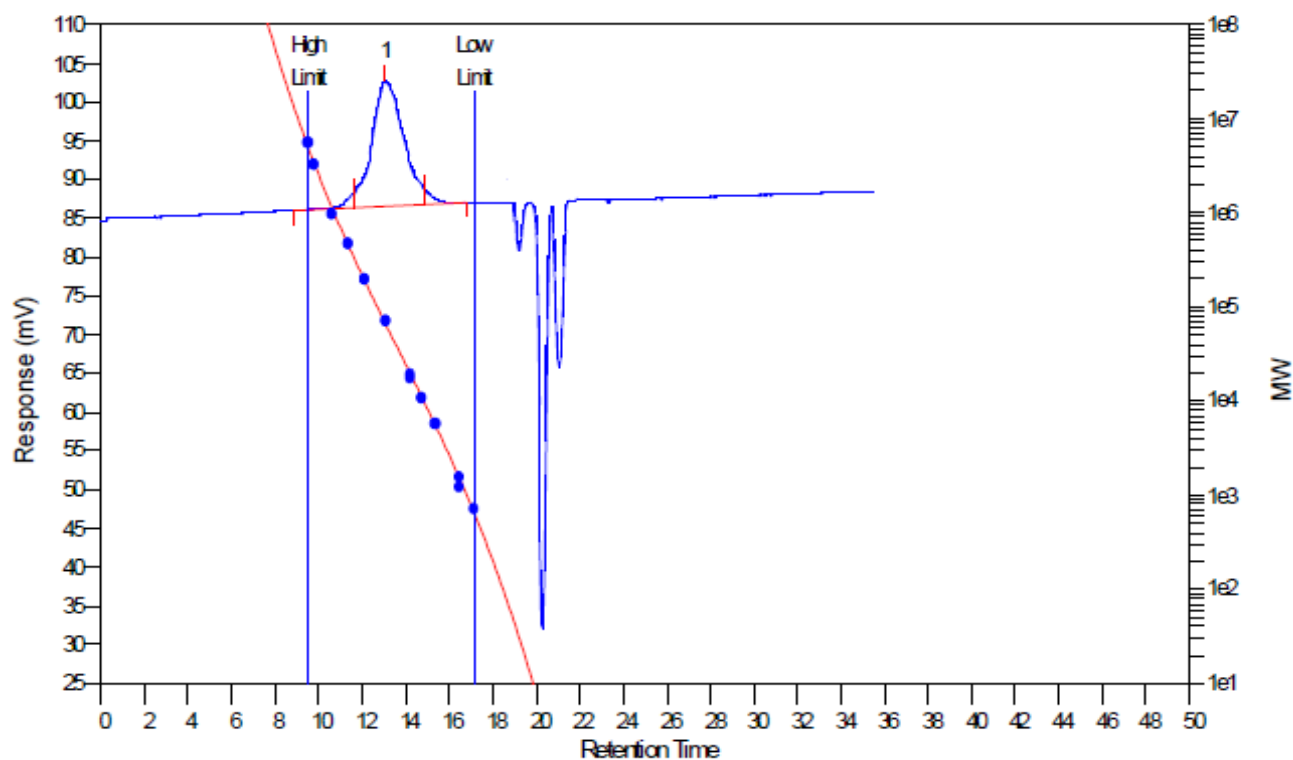

Figure S49. GPC curve of PM from run 2 of Table 1.

## SUPPORTING INFORMATION

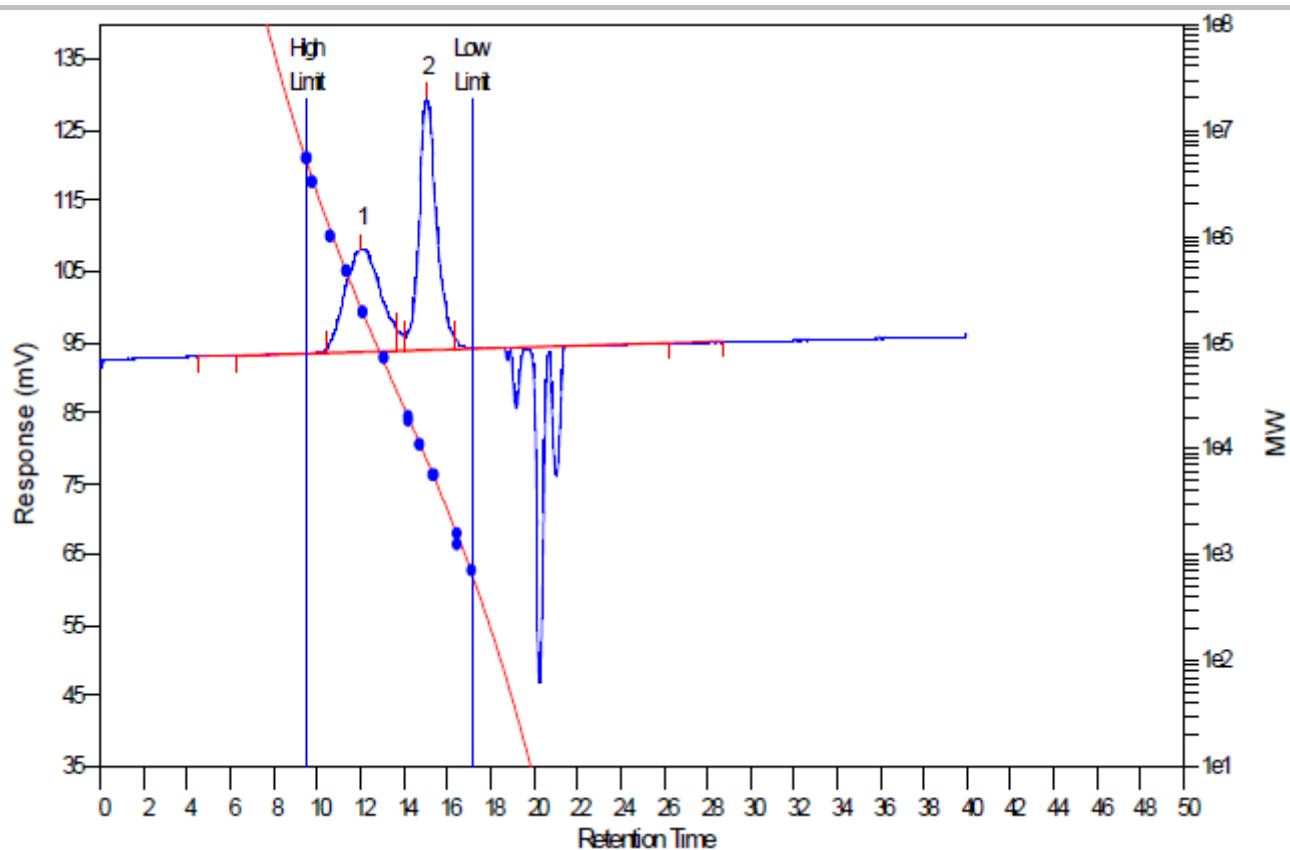

Figure S50. GPC curve of PM from run 3 of Table 1.

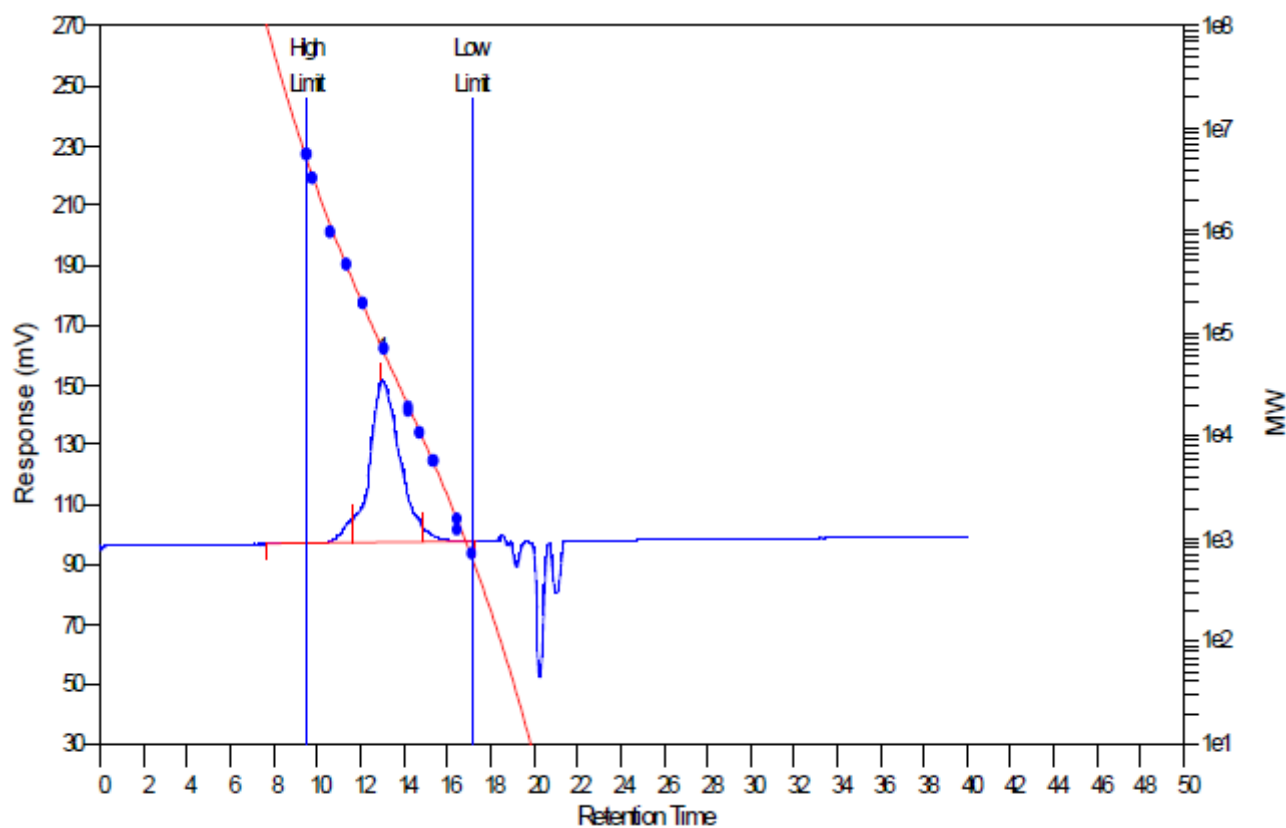

Figure S51. GPC curve of PM from run 4 of Table 1.

## SUPPORTING INFORMATION

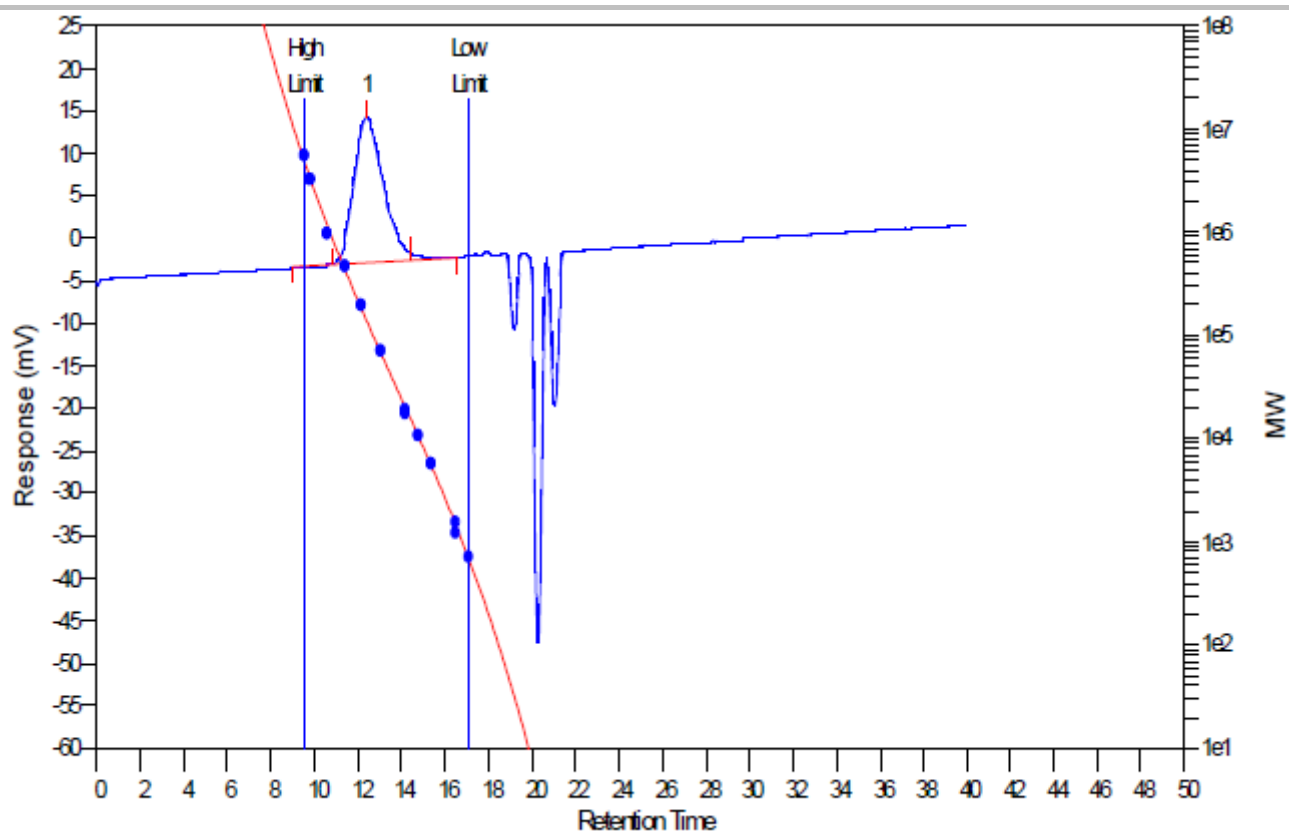

Figure S52. GPC curve of PS from run 5 of Table 1.

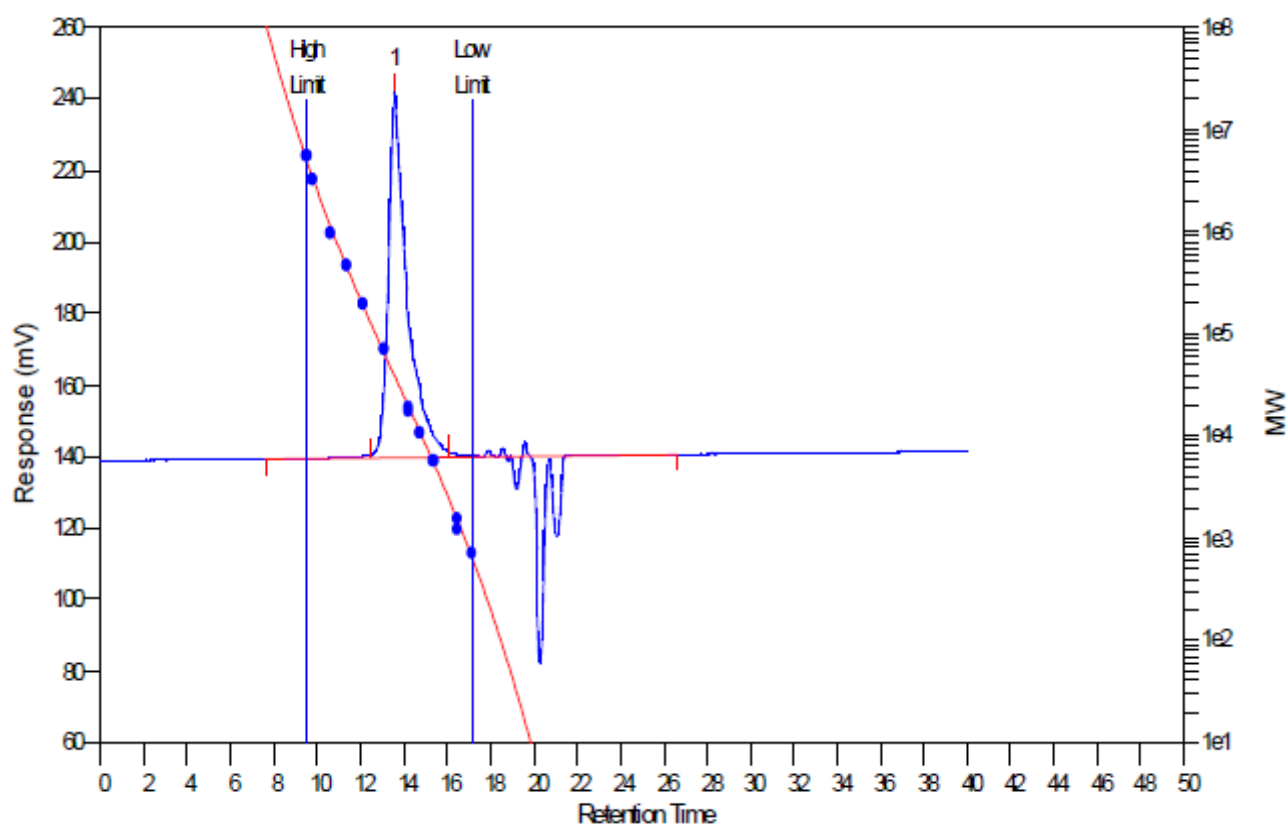

Figure S53. GPC curve of PI from run 8 of Table 1.

## SUPPORTING INFORMATION

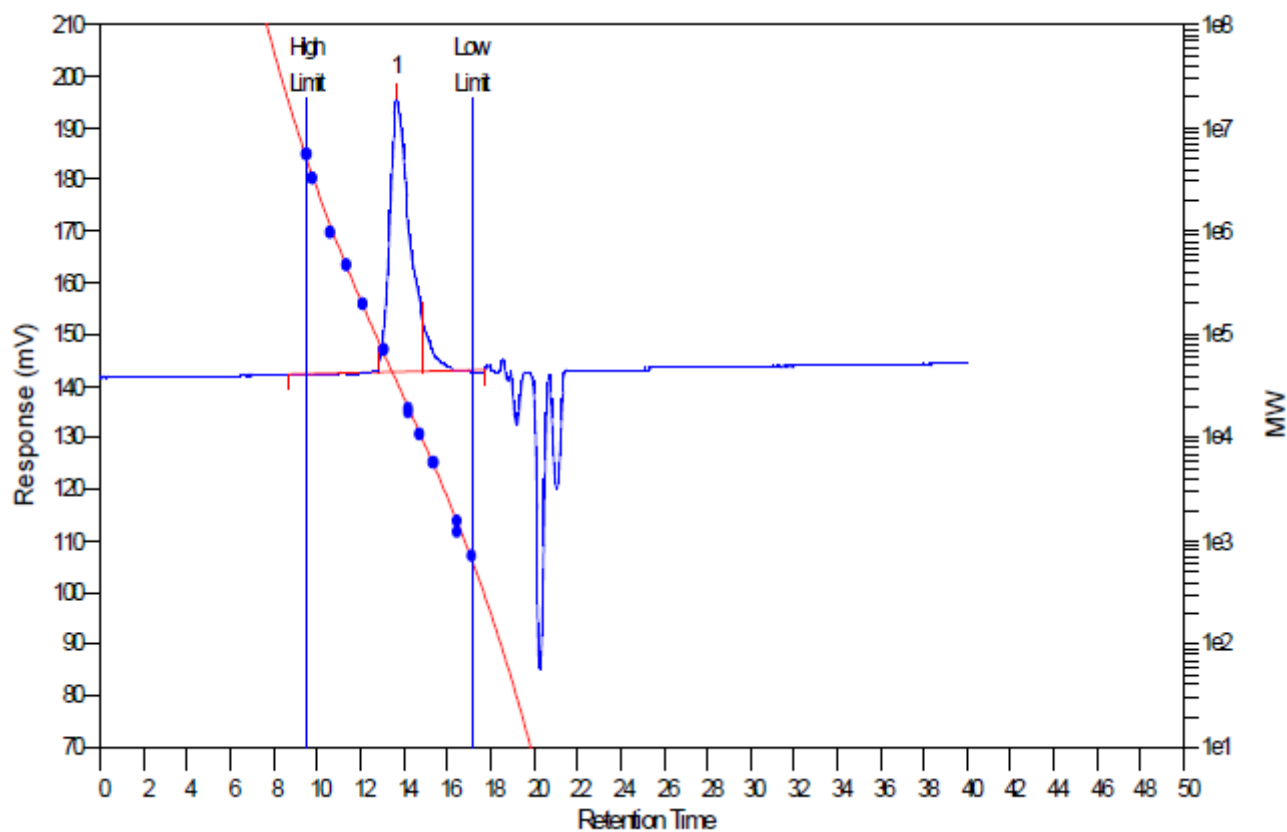

Figure S54. GPC curve of PI from run 9 of Table 1.

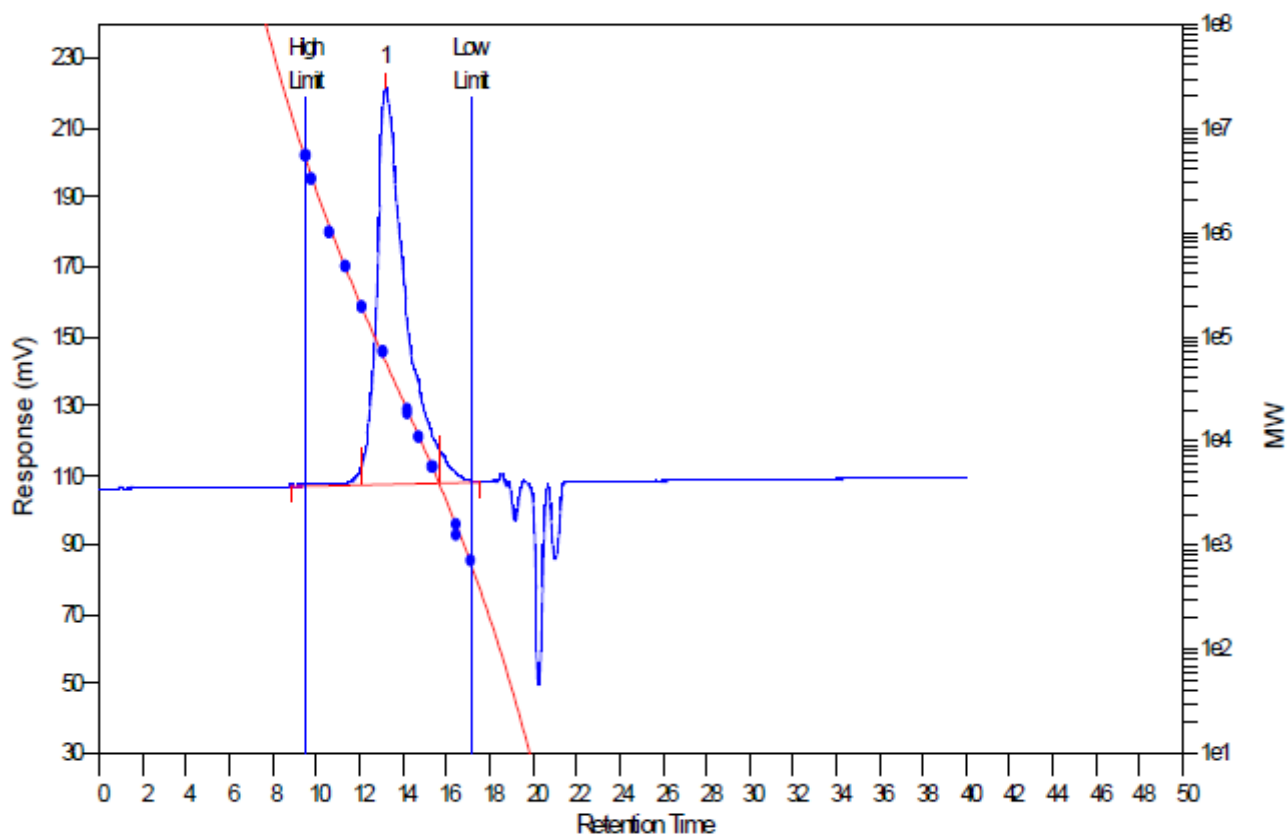

Figure S55. GPC curve of PMS from run 10 of Table 2.



## SUPPORTING INFORMATION

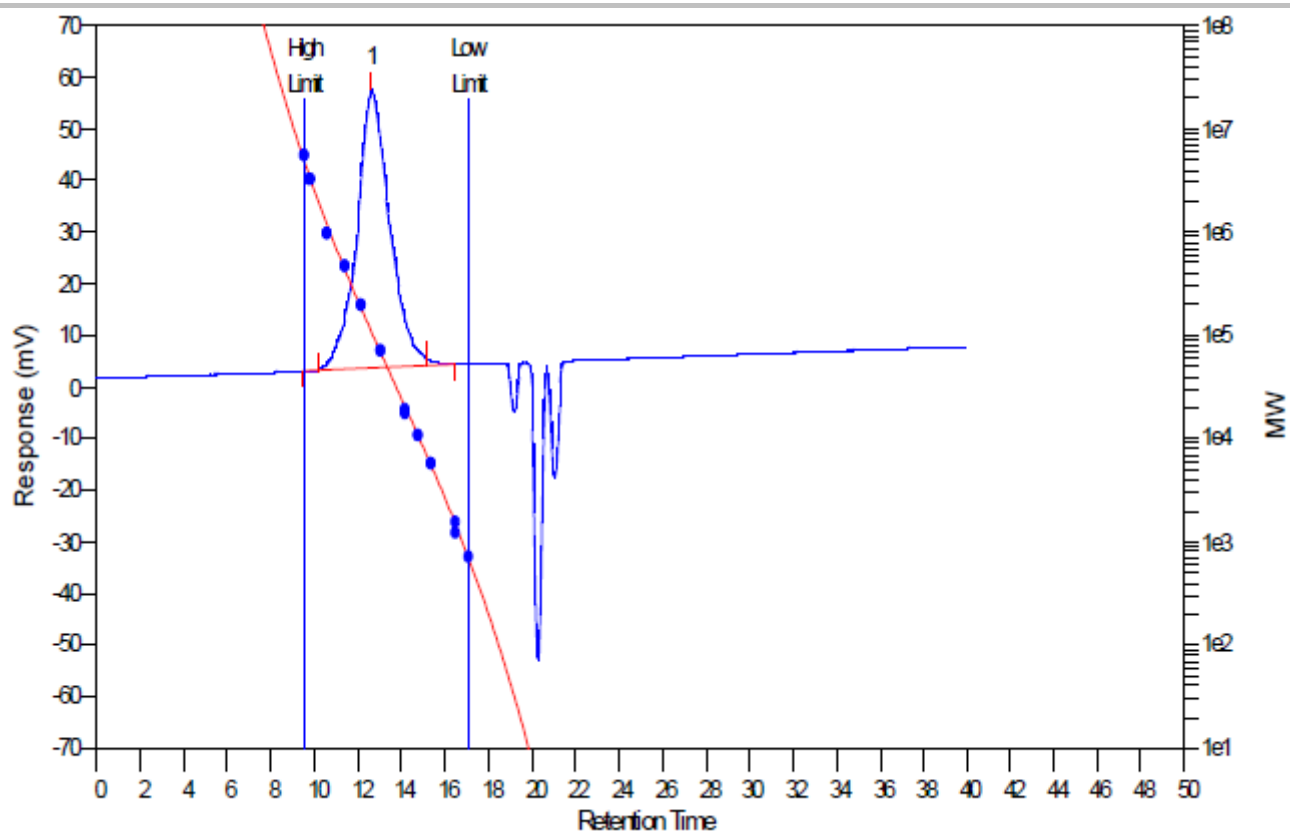

Figure S56. GPC curve of PMS from run 12 of Table 2.

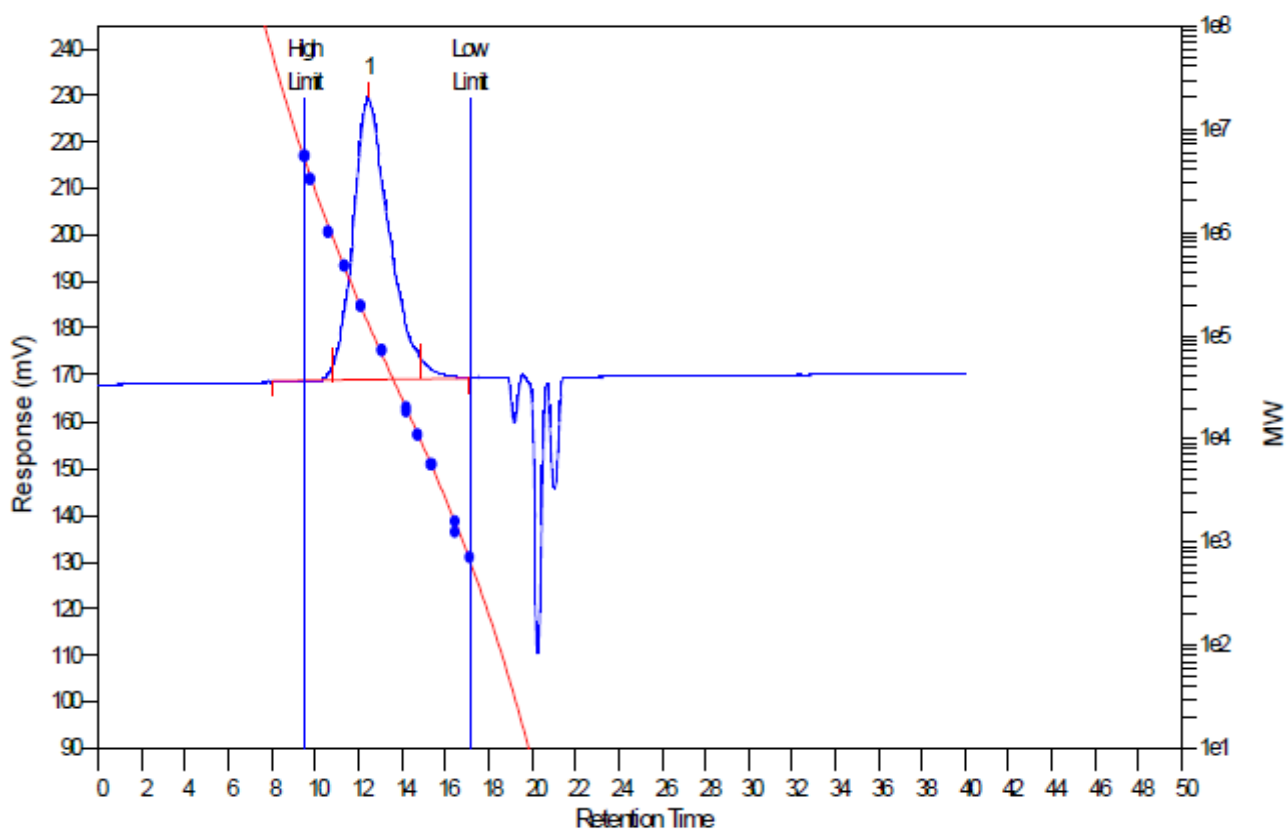

Figure S57. GPC curve of PMS from run 13 of Table 2.

## SUPPORTING INFORMATION

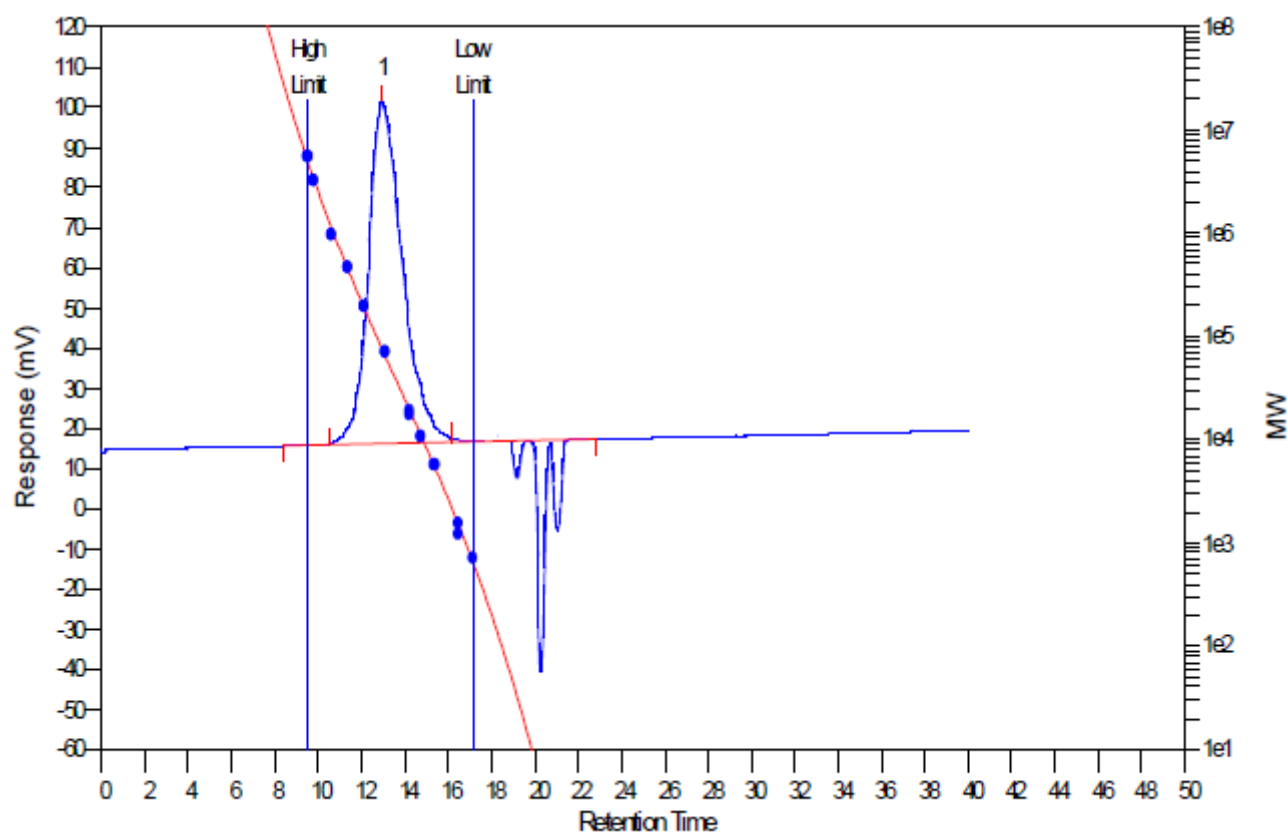

Figure S58. GPC curve of PMI from run 16 of Table 2.

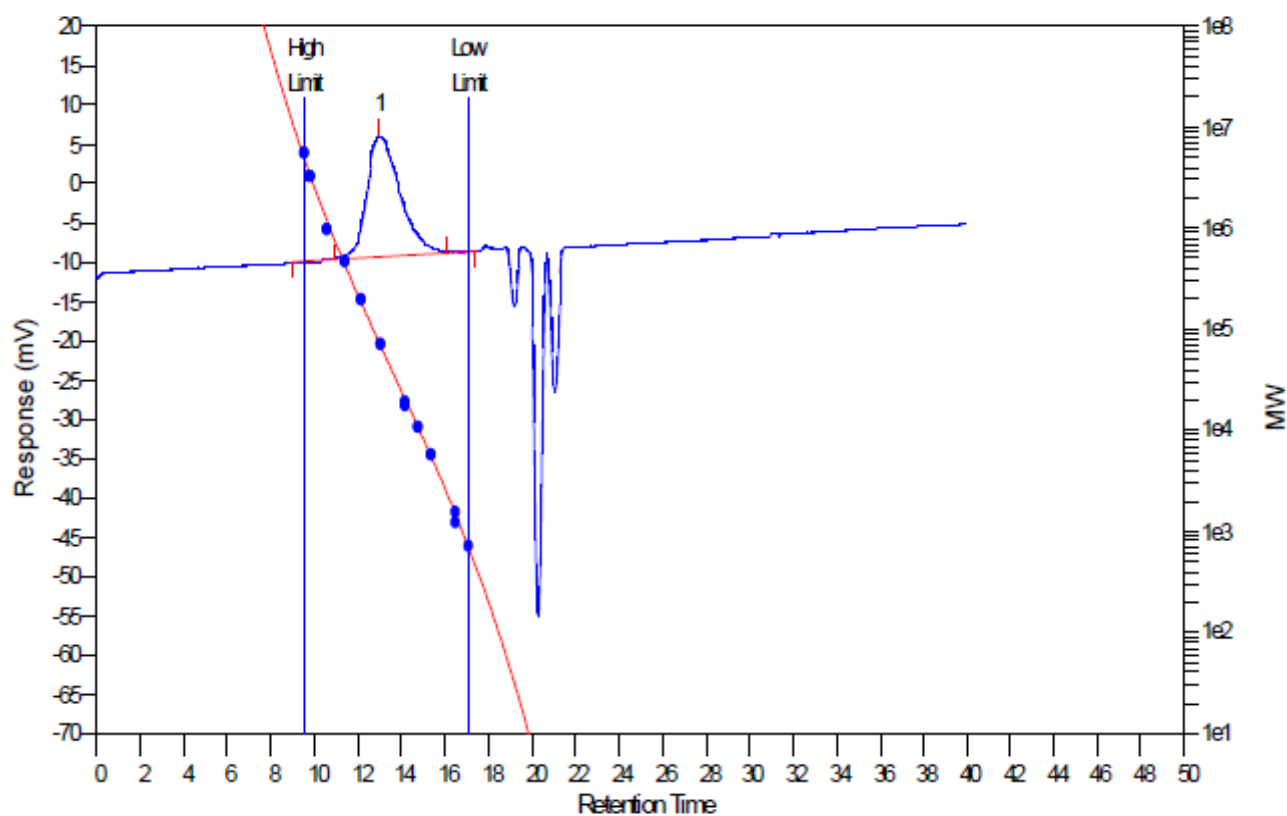

Figure S59. GPC curve of PMI from run 17 of Table 2.

## SUPPORTING INFORMATION

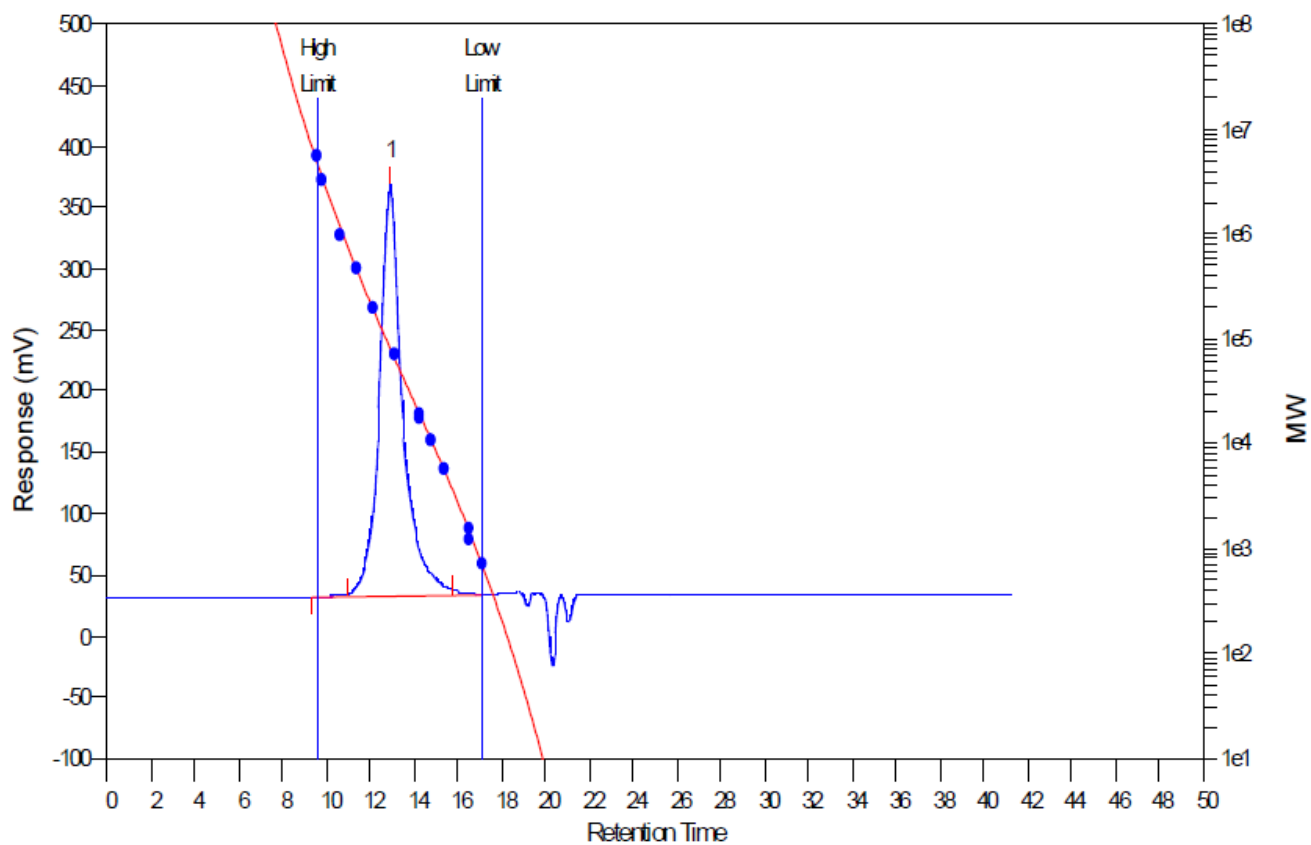

Figure S60. GPC curve of PMSI from run 20 of Table 2.

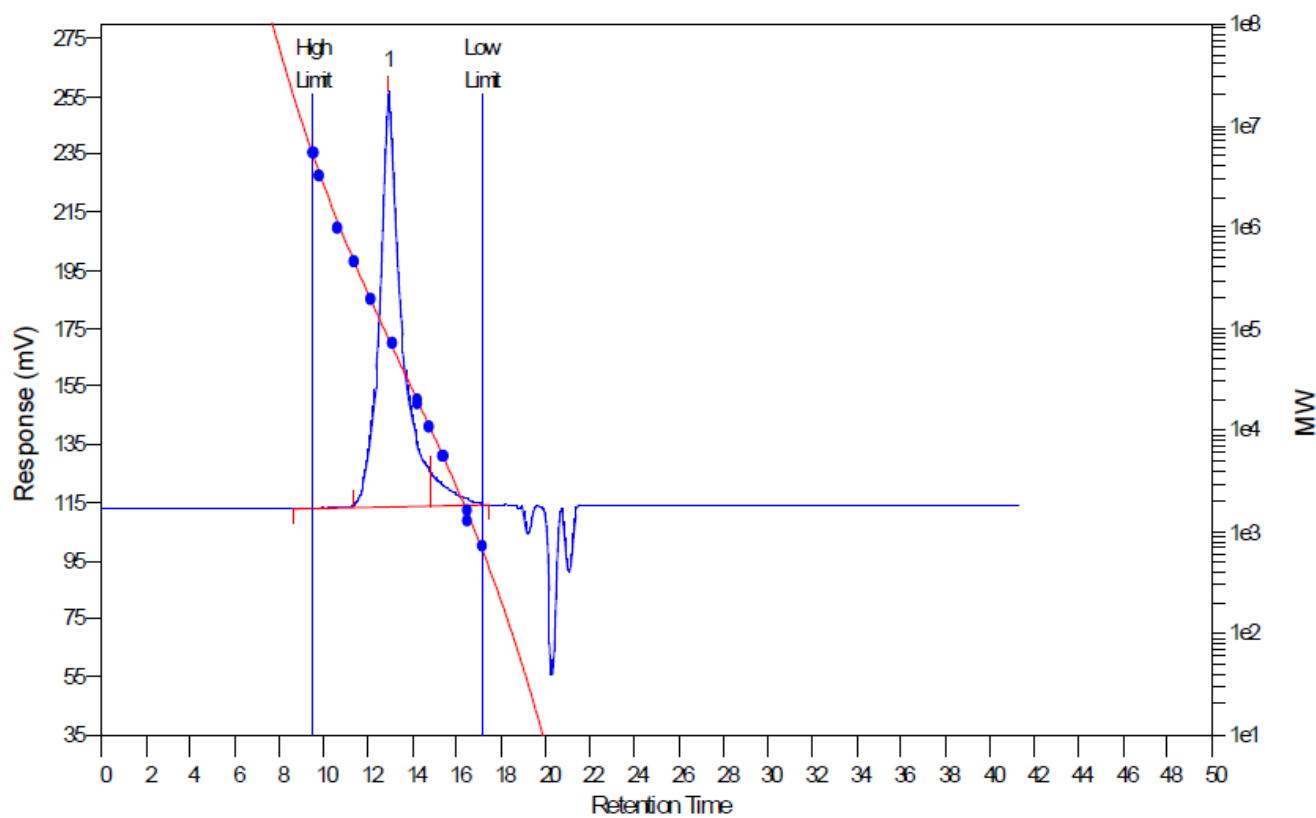

Figure S61. GPC curve of diblock PMS from run 21 of Table 2.

# SUPPORTING INFORMATION

## 7. CAM Analysis

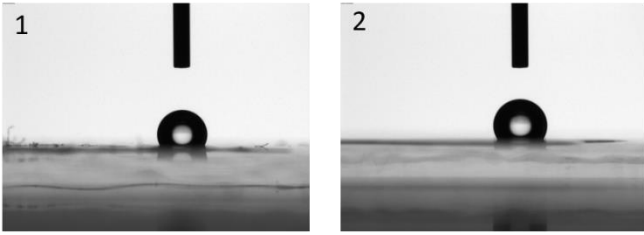

The CAM profiles of PI From run 7 Table 1

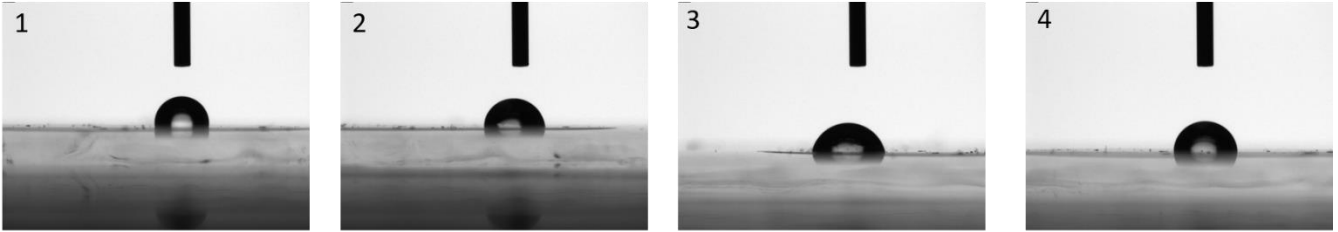

The CAM profiles of PMS From run 14 Table 2

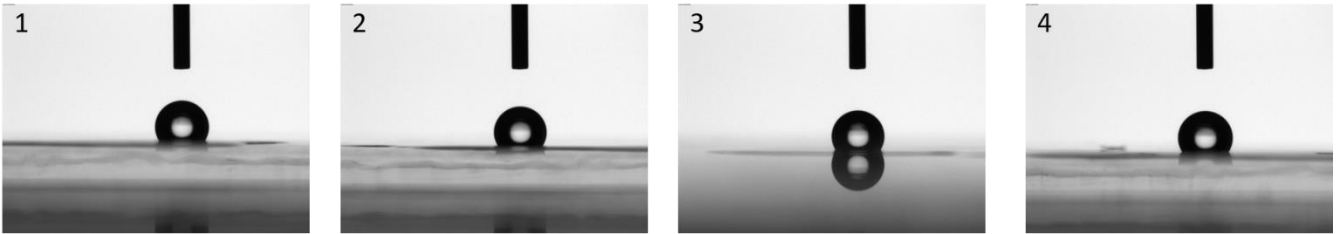

The CAM profiles of PMI From run 17 Table 2

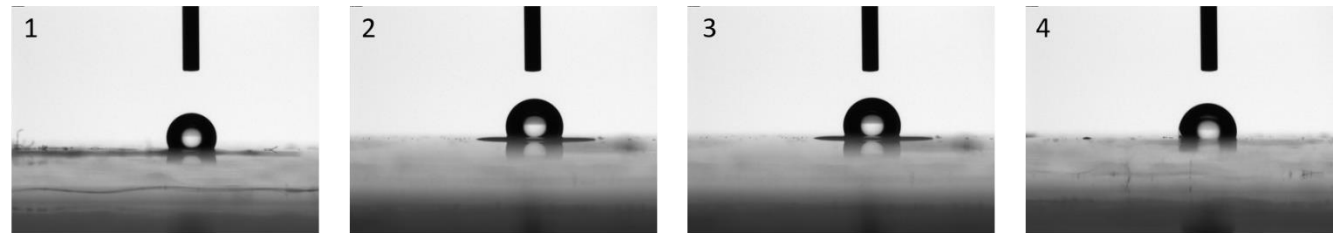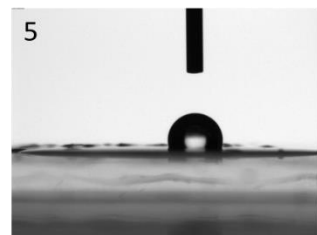

The CAM profiles of PMI From run 19 Table 2

## SUPPORTING INFORMATION

---

**Table T7 – Contact angles for tested samples**

| Sample        | Ø left | Ø right | Contact angle |
|---------------|--------|---------|---------------|
| Run 7         | 114,5  | 115,6   | 115,05        |
| "             | 116,1  | 112,4   | 114,25        |
| <b>Run7</b>   |        |         | <b>114,85</b> |
| Run 14        | 84,3   | 84,7    | 84,5          |
| "             | 84,1   | 92,1    | 88,1          |
| "             | 77,1   | 77,8    | 77,45         |
| "             | 82,9   | 86,6    | 84,75         |
| <b>Run 14</b> |        |         | <b>83,7</b>   |
| Run 17        | 125,6  | 125,8   | 125,7         |
| "             | 121    | 120,2   | 120,6         |
| "             | 121,4  | 120,7   | 121,05        |
| "             | 120,8  | 121,3   | 121,05        |
| <b>Run 17</b> |        |         | <b>122,1</b>  |
| Run 19        | 118,9  | 120,1   | 119,5         |
| "             | 113,7  | 109,2   | 111,45        |
| "             | 108    | 102     | 105           |
| "             | 101,2  | 110,5   | 105,85        |
| "             | 110,8  | 106,7   | 108,75        |
| <b>Run 19</b> |        |         | <b>110,11</b> |

## 8. SEM Analysis

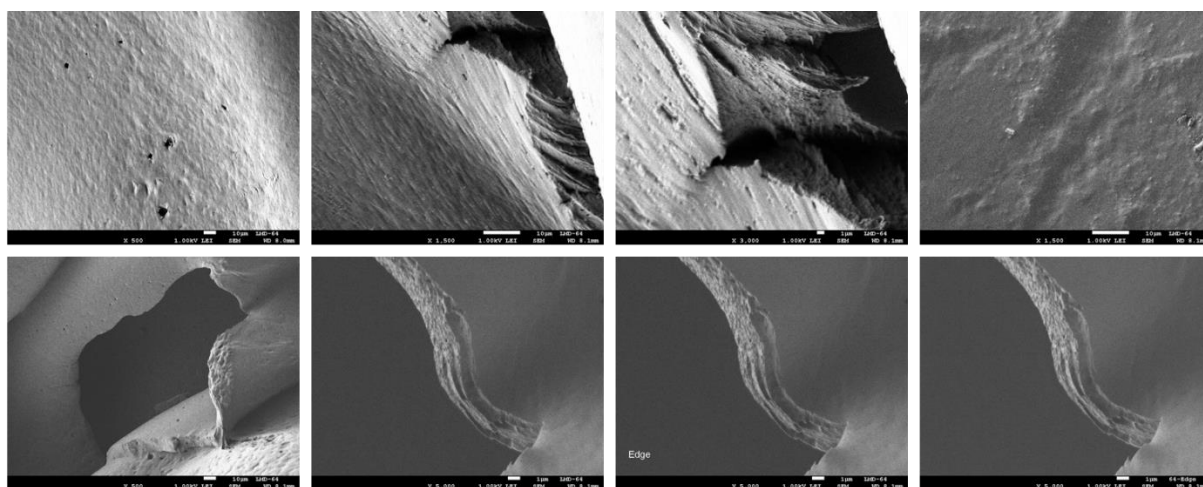

SEM image of PMS from run 14 Table 2

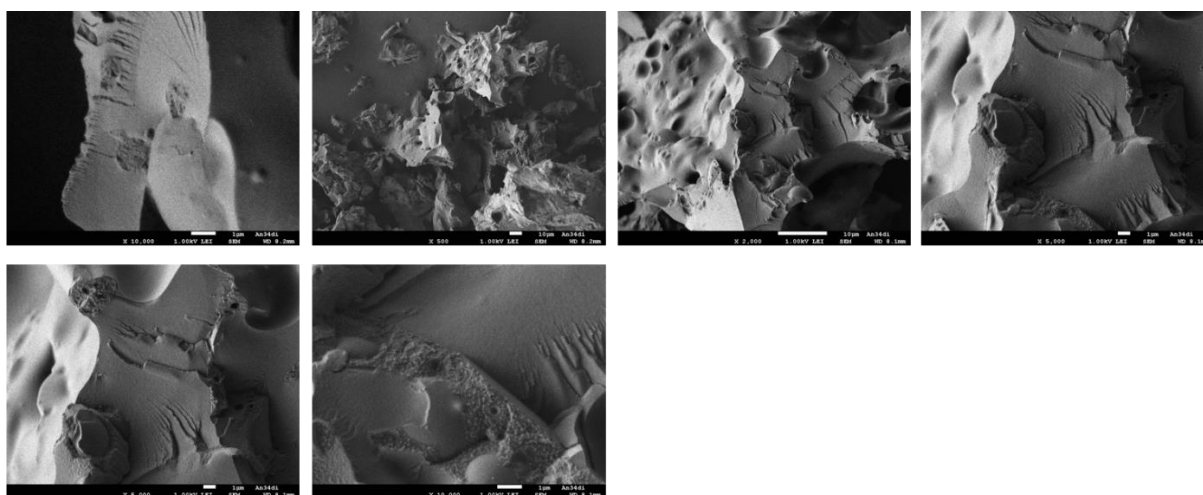

SEM image of PMS from run 21 Table 2

## 9. Kinetic studies

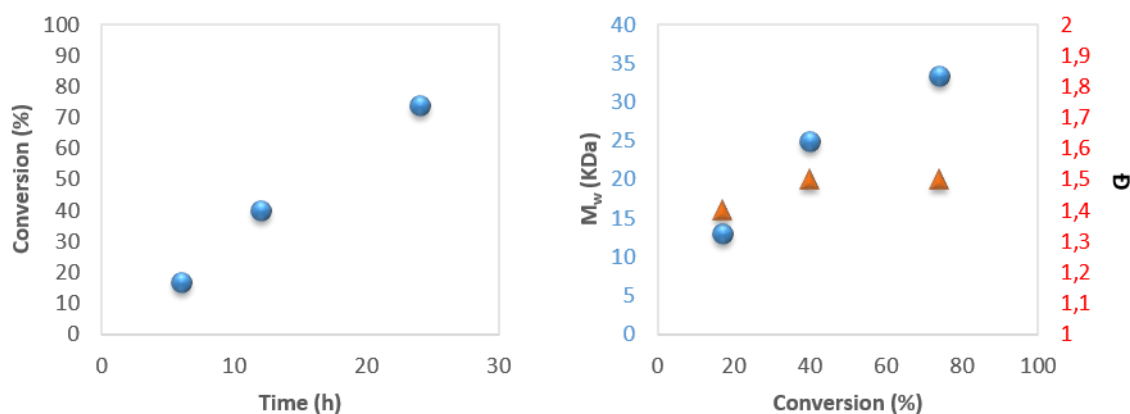

**Figure S61.** Conversion vs. time plot for isoprene polymerization (on left); plots of  $M_w$  (and Đ) vs conversion (on right)

Same experimental conditions of run 7 of **Table 1** (except for time)

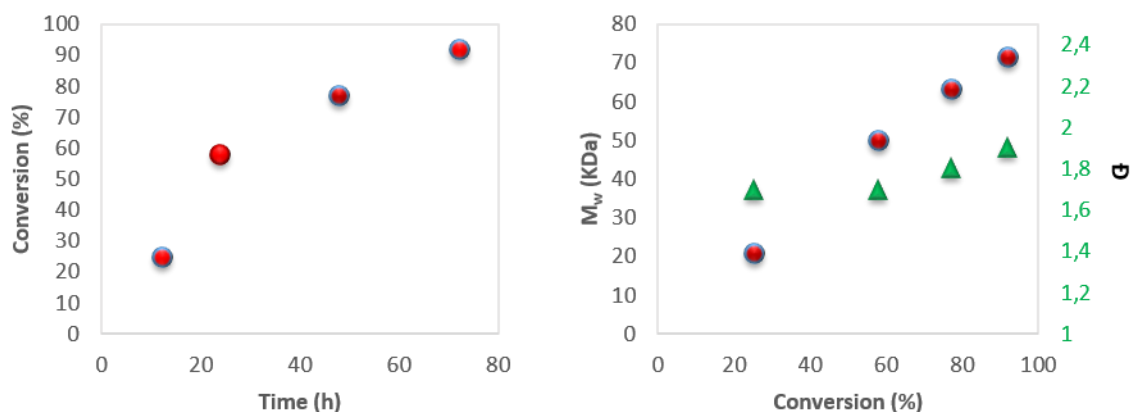

**Figure S62.** Conversion vs. time plot for myrcene polymerization (on left); plots of  $M_w$  (and Đ) vs conversion (on right)

Same experimental conditions of run 1 of **Table 1** (except for time)

## 10. References

- 1 M. I. Hulnik, I. V. Vasilenko, A. V. Radchenko, F. Peruch, F. Ganachaud and S. V. Kostjuk, *Polym. Chem.*, 2018, 9, 5690–5700.
- 2 M. Naddeo, A. Buonerba, E. Luciano, A. Grassi, A. Proto and C. Capacchione, *Polymer*, 2017, 131, 151–159.
- 3 X. Jia, X. Zhang and D. Gong, *J. Polym. Sci. Part A: Polym. Chem.*, 2018, 56, 2286–2293.
- 4 W. Li, J. Zhao, X. Zhang and D. Gong, *Ind. Eng. Chem. Res.*, 2019, 58, 2792–2800.
- 5 P. Sarkar and A. K. Bhowmick, *ACS Sustainable Chem. Eng.*, 2016, 4, 5462–5474.
- 6 C. Zhou, Z. Wei, X. Lei and Y. Li, *RSC Adv.*, 2016, 6, 63508–63514.

## 11. Author Contributions

Conceptualization, M.W., C.C., and D.H.L.; Methodology, M.W. and D.H.L.; Investigation, D.H.L., M.K.; Resources, M.W., C.C.; Data Curation, D.H.L.; Writing—Original Draft Preparation, D.H.L.; Writing—Review and Editing, M.W., C.C., and D.H.L.; Funding Acquisition, M.W., C.C.
